# Supplementary material for: Prevalence of Dementia and Cognitive Complaints in the Context of High Cognitive Reserve: A Population-Based Study
Source: PLoS One. 2015 Sep 21;10(9):e0138818. doi: 10.1371/journal.pone.0138818 (PMC4577122; doi:10.1371/journal.pone.0138818)
Supplement: S1 Dataset — (XLSX) [file pone.0138818.s001.xlsx]

## Sheet: #LN00556
IDMEMOVIE	gender	BAI	GdepS	death	dementia	Age	QPC Total score	dependency allowance	Disability pension	Disabled worker	Health status	Health status compared	Education	Lifestyle	Type of participation
MVIE08000173	FEMININ	.	.	0	0	81	.	Missing	Missing	Missing	Missing	Missing	missing	Missing	NON PARTICIPANT
MVIE08000274	FEMININ	.	.	0	0	72	.	Missing	Missing	Missing	Missing	Missing	missing	Missing	NON PARTICIPANT
MVIE08000375	FEMININ	.	.	0	0	80	.	Missing	Missing	Missing	Missing	Missing	missing	Missing	NON PARTICIPANT
MVIE08000476	FEMININ	.	.	0	0	67	.	Missing	Missing	Missing	Missing	Missing	missing	Missing	NON PARTICIPANT
MVIE08000577	FEMININ	2	2	0	0	70	0	No	No	No	Good	As good as	Secondary 2nd cycle	Single	FULL PARTICIPANT
MVIE08000678	FEMININ	.	.	0	0	68	0	No	No	No	Good	As good as	Secondary 1st cycle	Family cohabitation	PARTIAL PARTICIPANT
MVIE08000779	FEMININ	.	.	0	0	77	.	Missing	Missing	Missing	Missing	Missing	missing	Missing	NON PARTICIPANT
MVIE08000880	FEMININ	.	.	0	0	87	.	Missing	Missing	Missing	Missing	Missing	missing	Missing	NON PARTICIPANT
MVIE08000981	FEMININ	4	1	0	0	71	2	No	No	No	Intermediate	Better	Primary school	Single	FULL PARTICIPANT
MVIE08001082	FEMININ	.	.	0	0	69	.	Missing	Missing	Missing	Missing	Missing	missing	Missing	NON PARTICIPANT
MVIE08001183	FEMININ	19	1	0	0	84	1	No	No	No	Intermediate	Better	Secondary 1st cycle	Family cohabitation	FULL PARTICIPANT
MVIE08001284	FEMININ	3	0	0	0	67	0	No	Yes	No	Good	Better	Secondary 1st cycle	Couple	FULL PARTICIPANT
MVIE08001385	FEMININ	.	.	0	0	79	.	Missing	Missing	Missing	Missing	Missing	missing	Missing	NON PARTICIPANT
MVIE08001486	FEMININ	.	2	0	0	74	0	Missing	Missing	Missing	Missing	Missing	Higher education (short)	Couple	FULL PARTICIPANT
MVIE08001587	FEMININ	.	.	0	0	75	.	Missing	Missing	Missing	Missing	Missing	missing	Missing	NON PARTICIPANT
MVIE08001688	FEMININ	.	.	1	0	75	.	Missing	Missing	Missing	Missing	Missing	missing	Missing	PARTIAL PARTICIPANT
MVIE08001789	FEMININ	.	.	0	0	76	.	Missing	Missing	Missing	Missing	Missing	missing	Missing	NON PARTICIPANT
MVIE08001890	FEMININ	24	5	0	0	67	4	No	No	No	Good	As good as	Primary school	Family cohabitation	FULL PARTICIPANT
MVIE08001991	FEMININ	.	.	0	0	66	.	Missing	Missing	Missing	Missing	Missing	missing	Missing	NON PARTICIPANT
MVIE08002092	FEMININ	.	.	0	0	66	.	Missing	Missing	Missing	Missing	Missing	missing	Missing	NON PARTICIPANT
MVIE08002193	FEMININ	.	.	0	0	95	.	Missing	Missing	Missing	Missing	Missing	missing	Missing	NON PARTICIPANT
MVIE08002294	FEMININ	10	0	0	0	69	0	No	No	No	Very good	Better	Primary school	Couple	FULL PARTICIPANT
MVIE08002395	FEMININ	.	.	0	0	68	.	Missing	Missing	Missing	Missing	Missing	missing	Missing	NON PARTICIPANT
MVIE08002496	FEMININ	.	.	0	0	82	.	Missing	Missing	Missing	Missing	Missing	missing	Missing	NON PARTICIPANT
MVIE08002500	FEMININ	.	.	0	0	71	.	Missing	Missing	Missing	Missing	Missing	missing	Missing	NON PARTICIPANT
MVIE08002601	FEMININ	.	.	0	0	67	.	Missing	Missing	Missing	Missing	Missing	missing	Missing	NON PARTICIPANT
MVIE08002702	FEMININ	.	.	0	0	67	.	Missing	Missing	Missing	Missing	Missing	missing	Missing	NON PARTICIPANT
MVIE08002803	FEMININ	.	.	0	0	83	.	Missing	Missing	Missing	Missing	Missing	missing	Missing	NON PARTICIPANT
MVIE08002904	FEMININ	.	.	0	0	71	.	Missing	Missing	Missing	Missing	Missing	missing	Missing	NON PARTICIPANT
MVIE08003005	FEMININ	.	.	0	0	67	.	Missing	Missing	Missing	Missing	Missing	missing	Missing	NON PARTICIPANT
MVIE08003106	FEMININ	4	0	0	0	66	0	No	No	No	Good	Better	Secondary 1st cycle	Couple	FULL PARTICIPANT
MVIE08003207	FEMININ	.	.	0	0	66	2	No	Yes	No	Bad	Worse	Secondary 1st cycle	Family cohabitation	PARTIAL PARTICIPANT
MVIE08003308	FEMININ	.	.	0	0	78	.	Missing	Missing	Missing	Missing	Missing	missing	Missing	NON PARTICIPANT
MVIE08003409	FEMININ	.	.	0	0	73	.	Missing	Missing	Missing	Missing	Missing	missing	Missing	NON PARTICIPANT
MVIE08003510	FEMININ	3	1	0	0	75	2	No	No	No	Very good	Better	Secondary 1st cycle	Single	FULL PARTICIPANT
MVIE08003611	FEMININ	.	.	0	0	66	1	No	No	No	Good	Better	Secondary 1st cycle	Single	PARTIAL PARTICIPANT
MVIE08003712	FEMININ	.	.	0	0	86	.	Missing	Missing	Missing	Missing	Missing	missing	Missing	NON PARTICIPANT
MVIE08003813	FEMININ	.	.	0	0	70	.	Missing	Missing	Missing	Missing	Missing	missing	Missing	NON PARTICIPANT
MVIE08003914	FEMININ	.	7	0	0	66	2	No	No	No	Missing	Missing	Primary school	Family cohabitation	FULL PARTICIPANT
MVIE08004015	FEMININ	.	.	0	0	75	.	Missing	Missing	Missing	Missing	Missing	missing	Missing	NON PARTICIPANT
MVIE08004116	FEMININ	.	.	0	0	66	.	Missing	Missing	Missing	Missing	Missing	missing	Missing	NON PARTICIPANT
MVIE08004217	FEMININ	.	.	0	0	66	.	Missing	Missing	Missing	Missing	Missing	missing	Missing	NON PARTICIPANT
MVIE08004318	FEMININ	.	.	0	0	71	.	Missing	Missing	Missing	Missing	Missing	missing	Missing	NON PARTICIPANT
MVIE08004419	FEMININ	0	1	0	0	72	0	No	No	No	Good	As good as	Secondary 1st cycle	Family cohabitation	FULL PARTICIPANT
MVIE08004520	FEMININ	.	.	0	1	76	.	Missing	Missing	Missing	Missing	Missing	missing	Missing	PARTIAL PARTICIPANT
MVIE08004621	FEMININ	.	.	0	0	88	.	Missing	Missing	Missing	Missing	Missing	missing	Missing	NON PARTICIPANT
MVIE08004722	FEMININ	.	.	0	0	76	3	No	No	No	Intermediate	As good as	Secondary 2nd cycle	Couple	PARTIAL PARTICIPANT
MVIE08004823	FEMININ	.	.	0	0	76	.	Missing	Missing	Missing	Missing	Missing	missing	Missing	NON PARTICIPANT
MVIE08004924	FEMININ	.	.	0	0	78	1	No	No	No	Intermediate	As good as	Primary school	Single	PARTIAL PARTICIPANT
MVIE08005025	FEMININ	.	.	0	0	66	2	No	No	No	Good	Better	Secondary 1st cycle	Couple	PARTIAL PARTICIPANT
MVIE08005126	FEMININ	5	1	0	0	79	2	No	No	No	Good	As good as	Primary school	Family cohabitation	FULL PARTICIPANT
MVIE08005227	FEMININ	.	.	0	0	78	.	Missing	Missing	Missing	Missing	Missing	missing	Missing	NON PARTICIPANT
MVIE08005328	FEMININ	.	.	0	0	67	.	Missing	Missing	Missing	Missing	Missing	missing	Missing	NON PARTICIPANT
MVIE08005429	FEMININ	.	.	0	0	81	3	No	No	No	Intermediate	As good as	Secondary 1st cycle	Single	PARTIAL PARTICIPANT
MVIE08005530	FEMININ	.	.	0	0	77	.	Missing	Missing	Missing	Missing	Missing	missing	Missing	NON PARTICIPANT
MVIE08005631	FEMININ	.	.	0	0	66	.	Missing	Missing	Missing	Missing	Missing	missing	Missing	NON PARTICIPANT
MVIE08005732	FEMININ	.	.	0	0	78	0	No	No	No	Intermediate	As good as	Primary school	Couple	PARTIAL PARTICIPANT
MVIE08005833	FEMININ	.	.	0	0	73	.	Missing	Missing	Missing	Missing	Missing	missing	Missing	NON PARTICIPANT
MVIE08005934	FEMININ	.	.	0	0	74	.	Missing	Missing	Missing	Missing	Missing	missing	Missing	NON PARTICIPANT
MVIE08006035	FEMININ	.	.	0	0	76	.	Missing	Missing	Missing	Missing	Missing	missing	Missing	NON PARTICIPANT
MVIE08006136	FEMININ	.	.	0	0	82	.	Missing	Missing	Missing	Missing	Missing	missing	Missing	NON PARTICIPANT
MVIE08006237	FEMININ	.	.	0	0	76	.	Missing	Missing	Missing	Missing	Missing	missing	Missing	NON PARTICIPANT
MVIE08006338	FEMININ	.	.	0	0	73	.	Missing	Missing	Missing	Missing	Missing	missing	Missing	NON PARTICIPANT
MVIE08006439	FEMININ	.	.	0	0	76	.	Missing	Missing	Missing	Missing	Missing	missing	Missing	NON PARTICIPANT
MVIE08006540	FEMININ	.	.	0	0	69	.	Missing	Missing	Missing	Missing	Missing	missing	Missing	NON PARTICIPANT
MVIE08006641	FEMININ	.	.	0	0	72	.	Missing	Missing	Missing	Missing	Missing	missing	Missing	NON PARTICIPANT
MVIE08006742	FEMININ	.	.	0	0	84	.	Missing	Missing	Missing	Missing	Missing	missing	Missing	NON PARTICIPANT
MVIE08006843	FEMININ	.	.	1	0	81	.	Missing	Missing	Missing	Missing	Missing	missing	Missing	NON PARTICIPANT
MVIE08006944	FEMININ	.	.	0	0	89	.	Missing	Missing	Missing	Missing	Missing	missing	Missing	NON PARTICIPANT
MVIE08007045	FEMININ	.	.	0	0	66	.	Missing	Missing	Missing	Missing	Missing	missing	Missing	NON PARTICIPANT
MVIE08007146	FEMININ	.	.	0	0	70	.	Missing	Missing	Missing	Missing	Missing	missing	Missing	NON PARTICIPANT
MVIE08007247	FEMININ	.	.	0	1	70	.	Missing	Missing	Missing	Missing	Missing	missing	Missing	PARTIAL PARTICIPANT
MVIE08007348	FEMININ	.	.	0	0	73	.	Missing	Missing	Missing	Missing	Missing	missing	Missing	NON PARTICIPANT
MVIE08007449	FEMININ	7	0	0	0	76	0	No	No	No	Very good	Better	Secondary 2nd cycle	Single	FULL PARTICIPANT
MVIE08007550	FEMININ	.	.	0	0	66	.	Missing	Missing	Missing	Missing	Missing	missing	Missing	NON PARTICIPANT
MVIE08007651	FEMININ	.	.	0	0	84	.	Missing	Missing	Missing	Missing	Missing	missing	Missing	NON PARTICIPANT
MVIE08007752	FEMININ	.	.	0	0	81	.	Missing	Missing	Missing	Missing	Missing	missing	Missing	NON PARTICIPANT
MVIE08007853	FEMININ	.	.	0	0	88	.	Missing	Missing	Missing	Missing	Missing	missing	Missing	NON PARTICIPANT
MVIE08007954	FEMININ	3	5	0	0	72	3	No	No	No	Intermediate	Better	Primary school	Single	FULL PARTICIPANT
MVIE08008055	FEMININ	.	.	0	0	82	.	Missing	Missing	Missing	Missing	Missing	missing	Missing	NON PARTICIPANT
MVIE08008156	FEMININ	.	.	0	0	77	.	Missing	Missing	Missing	Missing	Missing	missing	Missing	NON PARTICIPANT
MVIE08008257	FEMININ	.	.	0	0	79	.	Missing	Missing	Missing	Missing	Missing	missing	Missing	NON PARTICIPANT
MVIE08008358	FEMININ	.	.	0	0	70	.	Missing	Missing	Missing	Missing	Missing	missing	Missing	NON PARTICIPANT
MVIE08008459	FEMININ	.	.	1	0	85	.	Missing	Missing	Missing	Missing	Missing	missing	Missing	PARTIAL PARTICIPANT
MVIE08008560	FEMININ	.	.	0	0	67	.	Missing	Missing	Missing	Missing	Missing	missing	Missing	NON PARTICIPANT
MVIE08008661	FEMININ	.	.	0	0	67	.	Missing	Missing	Missing	Missing	Missing	missing	Missing	NON PARTICIPANT
MVIE08008762	FEMININ	.	.	0	0	85	.	Missing	Missing	Missing	Missing	Missing	missing	Missing	NON PARTICIPANT
MVIE08008863	FEMININ	.	.	0	0	69	.	Missing	Missing	Missing	Missing	Missing	missing	Missing	NON PARTICIPANT
MVIE08008964	FEMININ	.	.	0	0	72	.	Missing	Missing	Missing	Missing	Missing	missing	Missing	NON PARTICIPANT
MVIE08009065	FEMININ	.	.	0	0	84	.	Missing	Missing	Missing	Missing	Missing	missing	Missing	NON PARTICIPANT
MVIE08009166	FEMININ	5	1	0	0	68	1	No	No	No	Good	As good as	Secondary 1st cycle	Couple	FULL PARTICIPANT
MVIE08009267	FEMININ	.	.	0	0	72	1	No	No	No	Good	As good as	Primary school	Family cohabitation	PARTIAL PARTICIPANT
MVIE08009368	FEMININ	.	.	0	0	77	0	No	No	No	Good	As good as	Secondary 2nd cycle	Single	PARTIAL PARTICIPANT
MVIE08009469	FEMININ	13	0	0	0	71	0	No	No	No	Intermediate	As good as	Secondary 1st cycle	Single	FULL PARTICIPANT
MVIE08009570	FEMININ	.	.	0	0	72	0	No	No	No	Good	As good as	Primary school	Single	PARTIAL PARTICIPANT
MVIE08009671	FEMININ	.	.	0	0	84	.	Missing	Missing	Missing	Missing	Missing	missing	Missing	NON PARTICIPANT
MVIE08009772	FEMININ	0	1	0	0	67	5	No	No	No	Good	Better	Secondary 1st cycle	Couple	FULL PARTICIPANT
MVIE08009873	FEMININ	.	.	0	0	85	.	Missing	Missing	Missing	Missing	Missing	missing	Missing	NON PARTICIPANT
MVIE08009974	FEMININ	.	.	0	0	70	.	Missing	Missing	Missing	Missing	Missing	missing	Missing	NON PARTICIPANT
MVIE08010075	FEMININ	.	.	0	0	83	.	Missing	Missing	Missing	Missing	Missing	missing	Missing	NON PARTICIPANT
MVIE08010176	FEMININ	.	.	0	0	79	1	Yes	No	No	Good	Missing	Secondary 1st cycle	Family cohabitation	PARTIAL PARTICIPANT
MVIE08010277	FEMININ	.	.	0	0	93	.	Missing	Missing	Missing	Missing	Missing	missing	Missing	NON PARTICIPANT
MVIE08010378	FEMININ	.	.	0	0	82	.	Missing	Missing	Missing	Missing	Missing	missing	Missing	NON PARTICIPANT
MVIE08010479	FEMININ	13	2	0	0	67	0	No	No	No	Intermediate	As good as	Higher education (short)	Couple	FULL PARTICIPANT
MVIE08010580	FEMININ	.	.	1	0	81	.	Missing	Missing	Missing	Missing	Missing	missing	Missing	NON PARTICIPANT
MVIE08010681	FEMININ	.	.	0	0	66	0	No	No	No	Good	Do not know	Primary school	Couple	PARTIAL PARTICIPANT
MVIE08010782	FEMININ	2	2	0	0	73	1	Yes	No	No	Good	Better	Higher education (short)	Couple	FULL PARTICIPANT
MVIE08010883	FEMININ	4	1	0	0	72	1	No	No	No	Good	As good as	Secondary 1st cycle	Couple	FULL PARTICIPANT
MVIE08010984	FEMININ	12	.	0	0	73	0	No	No	No	Bad	Worse	Secondary 1st cycle	Single	FULL PARTICIPANT
MVIE08011085	FEMININ	3	2	0	0	74	1	No	No	No	Good	As good as	Secondary 1st cycle	Couple	FULL PARTICIPANT
MVIE08011186	FEMININ	11	3	0	0	81	3	No	No	No	Good	Better	Higher education (short)	Single	FULL PARTICIPANT
MVIE08011287	FEMININ	.	.	0	0	83	2	No	No	No	Bad	Do not know	Primary school	Single	PARTIAL PARTICIPANT
MVIE08011388	FEMININ	.	.	0	0	78	.	Missing	Missing	Missing	Missing	Missing	missing	Missing	NON PARTICIPANT
MVIE08011489	FEMININ	.	.	0	0	81	.	Missing	Missing	Missing	Missing	Missing	missing	Missing	NON PARTICIPANT
MVIE08011590	MASCULIN	.	.	0	0	79	.	Missing	Missing	Missing	Missing	Missing	missing	Missing	NON PARTICIPANT
MVIE08011691	MASCULIN	.	.	0	0	73	.	Missing	Missing	Missing	Missing	Missing	missing	Missing	NON PARTICIPANT
MVIE08011792	MASCULIN	5	1	0	0	71	0	No	No	No	Good	As good as	Higher education - University	Couple	FULL PARTICIPANT
MVIE08011893	MASCULIN	.	.	0	0	75	.	Missing	Missing	Missing	Missing	Missing	missing	Missing	NON PARTICIPANT
MVIE08011994	MASCULIN	.	.	0	0	74	.	Missing	Missing	Missing	Missing	Missing	missing	Missing	NON PARTICIPANT
MVIE08012095	MASCULIN	.	.	0	0	75	.	Missing	Missing	Missing	Missing	Missing	missing	Missing	NON PARTICIPANT
MVIE08012196	MASCULIN	.	.	0	0	66	.	Missing	Missing	Missing	Missing	Missing	missing	Missing	NON PARTICIPANT
MVIE08012200	MASCULIN	.	.	0	0	73	.	Missing	Missing	Missing	Missing	Missing	missing	Missing	NON PARTICIPANT
MVIE08012301	MASCULIN	15	2	0	0	69	2	No	Yes	No	Intermediate	Better	Primary school	Couple	FULL PARTICIPANT
MVIE08012402	MASCULIN	.	.	0	0	69	.	Missing	Missing	Missing	Missing	Missing	missing	Missing	NON PARTICIPANT
MVIE08012503	MASCULIN	.	.	0	0	72	.	Missing	Missing	Missing	Missing	Missing	missing	Missing	NON PARTICIPANT
MVIE08012604	MASCULIN	.	.	1	0	87	.	Missing	Missing	Missing	Missing	Missing	missing	Missing	NON PARTICIPANT
MVIE08012705	MASCULIN	.	.	0	0	80	.	Missing	Missing	Missing	Missing	Missing	missing	Missing	NON PARTICIPANT
MVIE08012806	MASCULIN	0	5	0	0	77	0	No	No	No	Good	As good as	Secondary 1st cycle	Couple	FULL PARTICIPANT
MVIE08012907	MASCULIN	.	.	0	0	66	.	Missing	Missing	Missing	Missing	Missing	missing	Missing	NON PARTICIPANT
MVIE08013008	MASCULIN	.	3	0	0	73	2	No	No	No	Missing	Missing	Secondary 1st cycle	Couple	FULL PARTICIPANT
MVIE08013109	MASCULIN	.	.	0	0	82	.	Missing	Missing	Missing	Missing	Missing	missing	Missing	NON PARTICIPANT
MVIE08013210	MASCULIN	.	.	0	0	79	.	Missing	Missing	Missing	Missing	Missing	missing	Missing	NON PARTICIPANT
MVIE08013311	MASCULIN	1	0	0	0	73	2	No	No	No	Good	Better	Secondary 1st cycle	Couple	FULL PARTICIPANT
MVIE08013412	MASCULIN	5	1	0	0	67	0	Yes	Yes	Yes	Intermediate	As good as	Secondary 1st cycle	Couple	FULL PARTICIPANT
MVIE08013513	MASCULIN	1	4	1	0	71	1	No	No	No	Intermediate	Worse	Higher education (short)	Couple	FULL PARTICIPANT
MVIE08013614	MASCULIN	.	.	0	0	70	.	Missing	Missing	Missing	Missing	Missing	missing	Missing	NON PARTICIPANT
MVIE08013715	MASCULIN	6	0	0	0	67	0	No	No	No	Good	As good as	Higher education - University	Couple	FULL PARTICIPANT
MVIE08013816	MASCULIN	.	.	0	0	68	.	Missing	Missing	Missing	Missing	Missing	missing	Missing	NON PARTICIPANT
MVIE08013917	MASCULIN	13	.	0	0	70	2	No	No	No	Bad	Better	Higher education (short)	Couple	FULL PARTICIPANT
MVIE08014018	MASCULIN	.	.	0	0	66	.	Missing	Missing	Missing	Missing	Missing	missing	Missing	NON PARTICIPANT
MVIE08014119	MASCULIN	.	.	0	0	73	.	Missing	Missing	Missing	Missing	Missing	missing	Missing	NON PARTICIPANT
MVIE08014220	MASCULIN	2	3	0	0	80	1	No	No	No	Intermediate	Do not know	Secondary 1st cycle	Single	FULL PARTICIPANT
MVIE08014321	MASCULIN	.	.	0	0	78	.	Missing	Missing	Missing	Missing	Missing	missing	Missing	NON PARTICIPANT
MVIE08014422	MASCULIN	.	.	0	0	73	.	Missing	Missing	Missing	Missing	Missing	missing	Missing	NON PARTICIPANT
MVIE08014523	MASCULIN	.	.	0	0	80	.	Missing	Missing	Missing	Missing	Missing	missing	Missing	NON PARTICIPANT
MVIE08014624	MASCULIN	2	1	0	0	67	3	No	No	No	Good	As good as	Secondary 1st cycle	Couple	FULL PARTICIPANT
MVIE08014725	MASCULIN	.	.	0	0	66	.	Missing	Missing	Missing	Missing	Missing	missing	Missing	NON PARTICIPANT
MVIE08014826	MASCULIN	.	.	0	0	78	.	Missing	Missing	Missing	Missing	Missing	missing	Missing	NON PARTICIPANT
MVIE08014927	MASCULIN	.	.	0	0	74	0	No	No	No	Missing	Missing	Secondary 1st cycle	Couple	FULL PARTICIPANT
MVIE08015028	MASCULIN	.	.	0	0	66	.	Missing	Missing	Missing	Missing	Missing	missing	Missing	NON PARTICIPANT
MVIE08015129	MASCULIN	.	.	0	0	69	.	Missing	Missing	Missing	Missing	Missing	missing	Missing	NON PARTICIPANT
MVIE08015230	MASCULIN	3	2	0	0	74	5	No	No	No	Good	As good as	Secondary 1st cycle	Couple	FULL PARTICIPANT
MVIE08015331	MASCULIN	12	1	0	0	80	4	No	No	No	Good	Better	Higher education - University	Couple	FULL PARTICIPANT
MVIE08015432	MASCULIN	.	.	0	0	79	.	Missing	Missing	Missing	Missing	Missing	missing	Missing	NON PARTICIPANT
MVIE08015533	MASCULIN	.	.	0	1	91	.	Missing	Missing	Missing	Missing	Missing	missing	Missing	NON PARTICIPANT
MVIE08015634	MASCULIN	.	.	0	1	67	.	Missing	Missing	Missing	Missing	Missing	missing	Missing	PARTIAL PARTICIPANT
MVIE08015735	MASCULIN	.	.	0	0	70	.	Missing	Missing	Missing	Missing	Missing	missing	Missing	NON PARTICIPANT
MVIE08015836	MASCULIN	.	.	0	0	73	.	Missing	Missing	Missing	Missing	Missing	missing	Missing	NON PARTICIPANT
MVIE08015937	MASCULIN	.	.	0	0	78	.	Missing	Missing	Missing	Missing	Missing	missing	Missing	NON PARTICIPANT
MVIE08016038	MASCULIN	.	.	0	0	83	.	Missing	Missing	Missing	Missing	Missing	missing	Missing	NON PARTICIPANT
MVIE08016139	MASCULIN	.	.	0	0	79	.	No	No	No	Missing	Missing	Secondary 1st cycle	Couple	FULL PARTICIPANT
MVIE08016240	MASCULIN	.	.	1	0	78	.	Missing	Missing	Missing	Missing	Missing	missing	Missing	PARTIAL PARTICIPANT
MVIE08016341	MASCULIN	.	.	1	0	84	.	Missing	Missing	Missing	Missing	Missing	missing	Missing	NON PARTICIPANT
MVIE08016442	MASCULIN	.	.	0	0	68	.	Missing	Missing	Missing	Missing	Missing	missing	Missing	NON PARTICIPANT
MVIE08016543	MASCULIN	.	.	0	0	68	.	Missing	Missing	Missing	Missing	Missing	missing	Missing	NON PARTICIPANT
MVIE08016644	MASCULIN	.	.	0	0	77	.	Missing	Missing	Missing	Missing	Missing	missing	Missing	NON PARTICIPANT
MVIE08016745	MASCULIN	.	.	0	0	73	.	Missing	Missing	Missing	Missing	Missing	missing	Missing	NON PARTICIPANT
MVIE08016846	MASCULIN	3	2	0	0	75	2	No	No	No	Good	Better	Secondary 2nd cycle	Couple	FULL PARTICIPANT
MVIE08016947	MASCULIN	.	.	0	0	70	0	No	Yes	No	Intermediate	Do not know	Primary school	Couple	PARTIAL PARTICIPANT
MVIE08017048	MASCULIN	.	.	0	0	75	.	Missing	Missing	Missing	Missing	Missing	missing	Missing	NON PARTICIPANT
MVIE08017149	MASCULIN	1	0	0	0	77	1	No	No	No	Very good	As good as	Primary school	Couple	FULL PARTICIPANT
MVIE08017250	MASCULIN	.	.	0	0	70	.	Missing	Missing	Missing	Missing	Missing	missing	Missing	NON PARTICIPANT
MVIE08017351	MASCULIN	.	.	0	0	69	1	No	No	No	Good	As good as	Secondary 2nd cycle	Couple	PARTIAL PARTICIPANT
MVIE08017452	MASCULIN	.	.	0	0	70	0	No	No	No	Intermediate	Do not know	Secondary 1st cycle	Couple	PARTIAL PARTICIPANT
MVIE08017553	MASCULIN	.	.	0	0	78	.	Missing	Missing	Missing	Missing	Missing	missing	Missing	NON PARTICIPANT
MVIE08017654	MASCULIN	.	0	0	0	68	0	Missing	Missing	Missing	Missing	Missing	Secondary 1st cycle	Couple	FULL PARTICIPANT
MVIE08017755	MASCULIN	.	.	0	0	74	.	Missing	Missing	Missing	Missing	Missing	missing	Missing	NON PARTICIPANT
MVIE08017856	MASCULIN	.	.	0	0	80	2	No	No	No	Bad	Worse	Primary school	Couple	FULL PARTICIPANT
MVIE08017957	MASCULIN	.	.	0	0	74	.	Missing	Missing	Missing	Missing	Missing	missing	Missing	NON PARTICIPANT
MVIE08018058	MASCULIN	.	.	0	0	81	.	Missing	Missing	Missing	Missing	Missing	missing	Missing	NON PARTICIPANT
MVIE08018159	MASCULIN	.	.	0	0	72	.	Missing	Missing	Missing	Missing	Missing	missing	Missing	NON PARTICIPANT
MVIE08018260	MASCULIN	.	.	1	0	74	.	Missing	Missing	Missing	Missing	Missing	missing	Missing	NON PARTICIPANT
MVIE08018361	MASCULIN	.	.	0	0	73	.	Missing	Missing	Missing	Missing	Missing	missing	Missing	NON PARTICIPANT
MVIE08018462	MASCULIN	.	.	0	0	70	.	Missing	Missing	Missing	Missing	Missing	missing	Missing	NON PARTICIPANT
MVIE08018563	MASCULIN	.	.	0	0	69	.	Missing	Missing	Missing	Missing	Missing	missing	Missing	NON PARTICIPANT
MVIE08018664	MASCULIN	.	.	0	0	70	.	Missing	Missing	Missing	Missing	Missing	missing	Missing	NON PARTICIPANT
MVIE08018765	MASCULIN	.	.	0	0	80	.	Missing	Missing	Missing	Missing	Missing	missing	Missing	NON PARTICIPANT
MVIE08018866	MASCULIN	.	.	0	1	71	.	Missing	Missing	Missing	Missing	Missing	missing	Missing	NON PARTICIPANT
MVIE08018967	MASCULIN	.	.	0	0	84	0	Yes	No	No	Good	As good as	Higher education - University	Family cohabitation	PARTIAL PARTICIPANT
MVIE08019068	MASCULIN	.	.	0	0	72	.	Missing	Missing	Missing	Missing	Missing	missing	Missing	NON PARTICIPANT
MVIE08019169	MASCULIN	8	0	1	0	66	0	No	No	No	Good	As good as	Secondary 1st cycle	Couple	FULL PARTICIPANT
MVIE08019270	MASCULIN	.	.	0	0	81	1	No	No	No	Intermediate	As good as	Secondary 1st cycle	Family cohabitation	PARTIAL PARTICIPANT
MVIE08019371	MASCULIN	.	.	0	0	81	.	No	No	No	Missing	Missing	Primary school	Couple	FULL PARTICIPANT
MVIE08019472	MASCULIN	.	.	0	0	80	.	Missing	Missing	Missing	Missing	Missing	missing	Missing	NON PARTICIPANT
MVIE08019573	MASCULIN	.	.	0	0	67	.	Missing	Missing	Missing	Missing	Missing	missing	Missing	NON PARTICIPANT
MVIE08019674	MASCULIN	7	1	0	0	76	2	No	No	No	Very good	Better	Higher education - University	Couple	FULL PARTICIPANT
MVIE08019775	MASCULIN	4	1	0	0	69	1	No	No	No	Good	As good as	Secondary 2nd cycle	Couple	FULL PARTICIPANT
MVIE08019876	MASCULIN	.	.	0	0	74	.	Missing	Missing	Missing	Missing	Missing	missing	Missing	NON PARTICIPANT
MVIE08019977	MASCULIN	10	1	0	0	66	2	No	No	No	Good	As good as	Higher education - University	Couple	FULL PARTICIPANT
MVIE08020078	MASCULIN	8	2	0	0	76	0	No	No	No	Intermediate	As good as	Secondary 1st cycle	Couple	FULL PARTICIPANT
MVIE08020179	FEMININ	.	.	0	0	92	.	Missing	Missing	Missing	Missing	Missing	missing	Missing	NON PARTICIPANT
MVIE08020280	FEMININ	.	.	0	0	81	.	Missing	Missing	Missing	Missing	Missing	missing	Missing	NON PARTICIPANT
MVIE08020381	FEMININ	.	.	0	0	75	.	Missing	Missing	Missing	Missing	Missing	missing	Missing	NON PARTICIPANT
MVIE08020482	FEMININ	.	.	0	0	71	.	Missing	Missing	Missing	Missing	Missing	missing	Missing	NON PARTICIPANT
MVIE08020583	FEMININ	.	.	1	0	96	.	Missing	Missing	Missing	Missing	Missing	missing	Missing	PARTIAL PARTICIPANT
MVIE08020684	FEMININ	.	.	0	0	82	.	Missing	Missing	Missing	Missing	Missing	missing	Missing	NON PARTICIPANT
MVIE08020785	FEMININ	7	5	0	0	67	3	No	No	No	Intermediate	Worse	Secondary 2nd cycle	Couple	FULL PARTICIPANT
MVIE08020886	FEMININ	.	.	0	0	76	.	Missing	Missing	Missing	Missing	Missing	missing	Missing	NON PARTICIPANT
MVIE08020987	FEMININ	6	3	0	0	71	0	No	No	No	Good	Better	Secondary 1st cycle	Couple	FULL PARTICIPANT
MVIE08021088	FEMININ	.	.	0	0	68	.	Missing	Missing	Missing	Missing	Missing	missing	Missing	NON PARTICIPANT
MVIE08021189	FEMININ	.	.	0	0	75	.	Missing	Missing	Missing	Missing	Missing	missing	Missing	NON PARTICIPANT
MVIE08021290	FEMININ	.	.	0	0	78	.	Missing	Missing	Missing	Missing	Missing	missing	Missing	NON PARTICIPANT
MVIE08021391	FEMININ	.	.	0	0	85	.	Missing	Missing	Missing	Missing	Missing	missing	Missing	NON PARTICIPANT
MVIE08021492	FEMININ	.	.	1	0	80	.	Missing	Missing	Missing	Missing	Missing	missing	Missing	NON PARTICIPANT
MVIE08021593	FEMININ	.	.	0	0	68	.	Missing	Missing	Missing	Missing	Missing	missing	Missing	NON PARTICIPANT
MVIE08021694	FEMININ	.	.	0	0	77	.	Missing	Missing	Missing	Missing	Missing	missing	Missing	NON PARTICIPANT
MVIE08021795	FEMININ	.	.	0	0	76	2	No	Yes	Do not know	Intermediate	Missing	Primary school	Single	PARTIAL PARTICIPANT
MVIE08021896	FEMININ	1	2	0	0	80	2	No	No	No	Very good	Better	Secondary 1st cycle	Single	FULL PARTICIPANT
MVIE08021900	FEMININ	.	.	0	0	80	.	Missing	Missing	Missing	Missing	Missing	missing	Missing	NON PARTICIPANT
MVIE08022001	FEMININ	.	.	0	0	87	.	Missing	Missing	Missing	Missing	Missing	missing	Missing	NON PARTICIPANT
MVIE08022102	FEMININ	.	.	0	0	80	1	No	No	No	Very good	As good as	No schooling	Single	PARTIAL PARTICIPANT
MVIE08022203	FEMININ	.	.	0	0	70	.	Missing	Missing	Missing	Missing	Missing	missing	Missing	NON PARTICIPANT
MVIE08022304	FEMININ	10	1	0	0	66	2	No	No	No	Good	As good as	Secondary 1st cycle	Couple	FULL PARTICIPANT
MVIE08022405	FEMININ	.	.	0	0	83	.	Missing	Missing	Missing	Missing	Missing	missing	Missing	NON PARTICIPANT
MVIE08022506	FEMININ	.	.	0	0	91	.	Missing	Missing	Missing	Missing	Missing	missing	Missing	NON PARTICIPANT
MVIE08022607	FEMININ	.	.	0	0	84	.	Missing	Missing	Missing	Missing	Missing	missing	Missing	NON PARTICIPANT
MVIE08022708	FEMININ	4	3	0	0	71	5	No	No	No	Good	Better	Secondary 1st cycle	Single	FULL PARTICIPANT
MVIE08022809	FEMININ	.	.	0	0	86	.	Missing	Missing	Missing	Missing	Missing	missing	Missing	NON PARTICIPANT
MVIE08022910	FEMININ	.	.	0	0	87	.	Missing	Missing	Missing	Missing	Missing	missing	Missing	NON PARTICIPANT
MVIE08023011	FEMININ	.	.	0	0	81	.	Missing	Missing	Missing	Missing	Missing	missing	Missing	NON PARTICIPANT
MVIE08023112	FEMININ	.	.	0	0	69	.	Missing	Missing	Missing	Missing	Missing	missing	Missing	NON PARTICIPANT
MVIE08023213	FEMININ	.	.	0	0	80	.	Missing	Missing	Missing	Missing	Missing	missing	Missing	NON PARTICIPANT
MVIE08023314	FEMININ	.	.	0	0	71	.	Missing	Missing	Missing	Missing	Missing	missing	Missing	NON PARTICIPANT
MVIE08023415	FEMININ	2	1	0	0	75	1	No	No	No	Very good	As good as	Secondary 1st cycle	Single	FULL PARTICIPANT
MVIE08023516	FEMININ	.	.	0	0	83	.	Missing	Missing	Missing	Missing	Missing	missing	Missing	NON PARTICIPANT
MVIE08023617	FEMININ	.	.	1	1	87	.	Missing	Missing	Missing	Missing	Missing	missing	Missing	NON PARTICIPANT
MVIE08023718	FEMININ	.	.	0	0	85	.	Missing	Missing	Missing	Missing	Missing	missing	Missing	NON PARTICIPANT
MVIE08023819	FEMININ	.	.	0	0	67	.	Missing	Missing	Missing	Missing	Missing	missing	Missing	NON PARTICIPANT
MVIE08023920	FEMININ	.	.	0	0	80	.	Missing	Missing	Missing	Missing	Missing	missing	Missing	NON PARTICIPANT
MVIE08024021	FEMININ	.	.	0	0	77	10	No	No	No	Intermediate	As good as	Primary school	Couple	PARTIAL PARTICIPANT
MVIE08024122	FEMININ	.	.	0	0	78	1	No	No	No	Good	Do not know	Secondary 1st cycle	Single	PARTIAL PARTICIPANT
MVIE08024223	FEMININ	.	.	0	0	80	.	Missing	Missing	Missing	Missing	Missing	missing	Missing	NON PARTICIPANT
MVIE08024324	FEMININ	.	.	0	0	75	.	Missing	Missing	Missing	Missing	Missing	missing	Missing	NON PARTICIPANT
MVIE08024425	FEMININ	7	1	0	0	68	4	No	Yes	No	Good	Better	Primary school	Couple	FULL PARTICIPANT
MVIE08024526	FEMININ	.	.	0	0	78	.	Missing	Missing	Missing	Missing	Missing	missing	Missing	NON PARTICIPANT
MVIE08024627	FEMININ	.	.	0	0	80	.	Missing	Missing	Missing	Missing	Missing	missing	Missing	NON PARTICIPANT
MVIE08024728	FEMININ	.	.	1	0	95	.	Missing	Missing	Missing	Missing	Missing	missing	Missing	NON PARTICIPANT
MVIE08024829	FEMININ	.	.	1	0	67	.	Missing	Missing	Missing	Missing	Missing	missing	Missing	NON PARTICIPANT
MVIE08024930	FEMININ	.	.	0	0	69	.	Missing	Missing	Missing	Missing	Missing	missing	Missing	NON PARTICIPANT
MVIE08025031	FEMININ	.	.	0	0	75	.	Missing	Missing	Missing	Missing	Missing	missing	Missing	NON PARTICIPANT
MVIE08025132	FEMININ	.	.	0	0	81	.	Missing	Missing	Missing	Missing	Missing	missing	Missing	NON PARTICIPANT
MVIE08025233	FEMININ	.	.	0	0	77	.	Missing	Missing	Missing	Missing	Missing	missing	Missing	NON PARTICIPANT
MVIE08025334	FEMININ	.	.	0	0	66	.	Missing	Missing	Missing	Missing	Missing	missing	Missing	NON PARTICIPANT
MVIE08025435	FEMININ	.	.	0	0	69	.	Missing	Missing	Missing	Missing	Missing	missing	Missing	NON PARTICIPANT
MVIE08025536	FEMININ	11	1	0	0	87	0	No	No	No	Good	As good as	Secondary 1st cycle	Single	FULL PARTICIPANT
MVIE08025637	FEMININ	.	.	0	0	68	.	Missing	Missing	Missing	Missing	Missing	missing	Missing	NON PARTICIPANT
MVIE08025738	FEMININ	.	.	0	0	84	.	Missing	Missing	Missing	Missing	Missing	missing	Missing	NON PARTICIPANT
MVIE08025839	FEMININ	.	.	0	0	72	.	Missing	Missing	Missing	Missing	Missing	missing	Missing	NON PARTICIPANT
MVIE08025940	FEMININ	.	.	0	0	82	.	Missing	Missing	Missing	Missing	Missing	missing	Missing	NON PARTICIPANT
MVIE08026041	FEMININ	.	.	0	1	80	.	Missing	Missing	Missing	Missing	Missing	missing	Missing	PARTIAL PARTICIPANT
MVIE08026142	FEMININ	.	.	0	0	71	.	Missing	Missing	Missing	Missing	Missing	missing	Missing	NON PARTICIPANT
MVIE08026243	FEMININ	0	3	0	0	71	1	No	No	No	Good	Better	Secondary 1st cycle	Couple	FULL PARTICIPANT
MVIE08026344	FEMININ	.	.	0	0	84	.	Missing	Missing	Missing	Missing	Missing	missing	Missing	NON PARTICIPANT
MVIE08026445	FEMININ	.	.	0	0	67	.	Missing	Missing	Missing	Missing	Missing	missing	Missing	NON PARTICIPANT
MVIE08026546	FEMININ	.	.	0	0	75	.	Missing	Missing	Missing	Missing	Missing	missing	Missing	NON PARTICIPANT
MVIE08026647	FEMININ	.	.	0	0	70	.	Missing	Missing	Missing	Missing	Missing	missing	Missing	NON PARTICIPANT
MVIE08026748	FEMININ	.	.	0	0	76	.	Missing	Missing	Missing	Missing	Missing	missing	Missing	NON PARTICIPANT
MVIE08026849	FEMININ	2	1	0	1	85	5	No	No	No	Good	As good as	Primary school	Non-family cohabitation	FULL PARTICIPANT
MVIE08026950	FEMININ	.	.	0	0	67	.	Missing	Missing	Missing	Missing	Missing	missing	Missing	NON PARTICIPANT
MVIE08027051	FEMININ	.	.	0	0	81	.	Missing	Missing	Missing	Missing	Missing	missing	Missing	NON PARTICIPANT
MVIE08027152	FEMININ	.	.	0	0	82	.	Missing	Missing	Missing	Missing	Missing	missing	Missing	NON PARTICIPANT
MVIE08027253	FEMININ	.	.	0	0	71	.	Missing	Missing	Missing	Missing	Missing	missing	Missing	NON PARTICIPANT
MVIE08027354	FEMININ	.	.	0	0	77	.	Missing	Missing	Missing	Missing	Missing	missing	Missing	NON PARTICIPANT
MVIE08027455	FEMININ	.	.	0	0	89	.	Missing	Missing	Missing	Missing	Missing	missing	Missing	NON PARTICIPANT
MVIE08027556	FEMININ	6	4	0	0	67	2	No	No	No	Intermediate	Better	Higher education (short)	Couple	FULL PARTICIPANT
MVIE08027657	FEMININ	1	4	0	0	71	0	No	Yes	Yes	Intermediate	Worse	Secondary 1st cycle	Family cohabitation	FULL PARTICIPANT
MVIE08027758	FEMININ	.	.	0	0	83	.	Missing	Missing	Missing	Missing	Missing	missing	Missing	NON PARTICIPANT
MVIE08027859	FEMININ	7	2	0	0	71	4	No	No	No	Intermediate	As good as	Secondary 1st cycle	Couple	FULL PARTICIPANT
MVIE08027960	FEMININ	.	.	0	0	67	.	Missing	Missing	Missing	Missing	Missing	missing	Missing	NON PARTICIPANT
MVIE08028061	FEMININ	.	.	0	0	69	.	Missing	Missing	Missing	Missing	Missing	missing	Missing	NON PARTICIPANT
MVIE08028162	FEMININ	.	.	0	0	73	.	Missing	Missing	Missing	Missing	Missing	missing	Missing	NON PARTICIPANT
MVIE08028263	FEMININ	.	.	0	0	71	.	Missing	Missing	Missing	Missing	Missing	missing	Missing	NON PARTICIPANT
MVIE08028364	FEMININ	.	.	1	0	93	.	Missing	Missing	Missing	Missing	Missing	missing	Missing	NON PARTICIPANT
MVIE08028465	FEMININ	.	.	0	0	80	.	Missing	Missing	Missing	Missing	Missing	missing	Missing	NON PARTICIPANT
MVIE08028566	FEMININ	.	.	0	0	70	.	Missing	Missing	Missing	Missing	Missing	missing	Missing	NON PARTICIPANT
MVIE08028667	FEMININ	.	.	0	0	72	.	Missing	Missing	Missing	Missing	Missing	missing	Missing	NON PARTICIPANT
MVIE08028768	FEMININ	.	.	0	0	70	.	Missing	Missing	Missing	Missing	Missing	missing	Missing	NON PARTICIPANT
MVIE08028869	FEMININ	.	.	0	0	80	.	Missing	Missing	Missing	Missing	Missing	missing	Missing	NON PARTICIPANT
MVIE08028970	FEMININ	.	.	0	0	74	.	Missing	Missing	Missing	Missing	Missing	missing	Missing	NON PARTICIPANT
MVIE08029071	FEMININ	.	.	0	0	82	.	Missing	Missing	Missing	Missing	Missing	missing	Missing	NON PARTICIPANT
MVIE08029172	FEMININ	.	.	0	1	78	.	Missing	Missing	Missing	Missing	Missing	missing	Missing	NON PARTICIPANT
MVIE08029273	FEMININ	.	.	0	1	67	.	Missing	Missing	Missing	Missing	Missing	missing	Missing	NON PARTICIPANT
MVIE08029374	FEMININ	.	.	1	0	92	.	Missing	Missing	Missing	Missing	Missing	missing	Missing	NON PARTICIPANT
MVIE08029475	FEMININ	.	.	0	0	91	.	Missing	Missing	Missing	Missing	Missing	missing	Missing	NON PARTICIPANT
MVIE08029576	FEMININ	1	2	0	0	79	0	No	No	No	Good	Better	Higher education (short)	Single	FULL PARTICIPANT
MVIE08029677	FEMININ	.	.	0	0	68	.	Missing	Missing	Missing	Missing	Missing	missing	Missing	NON PARTICIPANT
MVIE08029778	FEMININ	.	3	0	0	80	1	No	No	No	Missing	Missing	Secondary 2nd cycle	Family cohabitation	FULL PARTICIPANT
MVIE08029879	FEMININ	.	.	0	0	74	.	Missing	Missing	Missing	Missing	Missing	missing	Missing	NON PARTICIPANT
MVIE08029980	FEMININ	.	.	0	0	78	.	No	No	No	Missing	Missing	Secondary 1st cycle	Single	FULL PARTICIPANT
MVIE08030081	FEMININ	.	.	0	0	75	.	Missing	Missing	Missing	Missing	Missing	missing	Missing	NON PARTICIPANT
MVIE08030182	FEMININ	.	.	1	0	82	.	Missing	Missing	Missing	Missing	Missing	missing	Missing	NON PARTICIPANT
MVIE08030283	FEMININ	.	.	0	0	87	.	Missing	Missing	Missing	Missing	Missing	missing	Missing	NON PARTICIPANT
MVIE08030384	FEMININ	.	.	0	0	77	0	No	No	No	Intermediate	Better	Primary school	Single	PARTIAL PARTICIPANT
MVIE08030485	FEMININ	.	.	0	0	76	.	Missing	Missing	Missing	Missing	Missing	missing	Missing	NON PARTICIPANT
MVIE08030586	FEMININ	.	.	0	0	88	.	Missing	Missing	Missing	Missing	Missing	missing	Missing	NON PARTICIPANT
MVIE08030687	FEMININ	.	.	0	0	71	.	Missing	Missing	Missing	Missing	Missing	missing	Missing	NON PARTICIPANT
MVIE08030788	FEMININ	.	.	0	0	79	.	Missing	Missing	Missing	Missing	Missing	missing	Missing	NON PARTICIPANT
MVIE08030889	FEMININ	.	.	0	0	69	.	Missing	Missing	Missing	Missing	Missing	missing	Missing	NON PARTICIPANT
MVIE08030990	FEMININ	.	.	0	0	70	.	Missing	Missing	Missing	Missing	Missing	missing	Missing	NON PARTICIPANT
MVIE08031091	FEMININ	.	.	0	0	67	.	Missing	Missing	Missing	Missing	Missing	missing	Missing	NON PARTICIPANT
MVIE08031192	FEMININ	.	.	0	0	81	.	Missing	Missing	Missing	Missing	Missing	missing	Missing	NON PARTICIPANT
MVIE08031293	FEMININ	.	.	0	0	76	.	Missing	Missing	Missing	Missing	Missing	missing	Missing	NON PARTICIPANT
MVIE08031394	FEMININ	.	.	0	0	66	.	Missing	Missing	Missing	Missing	Missing	missing	Missing	NON PARTICIPANT
MVIE08031495	FEMININ	.	.	1	0	69	.	Missing	Missing	Missing	Missing	Missing	missing	Missing	NON PARTICIPANT
MVIE08031596	FEMININ	13	5	0	0	75	5	No	No	No	Intermediate	Worse	Secondary 1st cycle	Couple	FULL PARTICIPANT
MVIE08031600	FEMININ	.	.	0	0	80	.	Missing	Missing	Missing	Missing	Missing	missing	Missing	NON PARTICIPANT
MVIE08031701	FEMININ	.	.	0	0	78	.	Missing	Missing	Missing	Missing	Missing	missing	Missing	NON PARTICIPANT
MVIE08031802	FEMININ	3	4	0	0	81	0	No	No	No	Very good	Better	Secondary 1st cycle	Single	FULL PARTICIPANT
MVIE08031903	FEMININ	.	.	0	0	72	2	No	No	No	Good	Better	Secondary 2nd cycle	Single	PARTIAL PARTICIPANT
MVIE08032004	FEMININ	.	.	0	0	78	.	Missing	Missing	Missing	Missing	Missing	missing	Missing	NON PARTICIPANT
MVIE08032105	FEMININ	.	.	0	0	77	.	Missing	Missing	Missing	Missing	Missing	missing	Missing	NON PARTICIPANT
MVIE08032206	FEMININ	8	1	0	0	76	3	No	No	No	Good	Better	Primary school	Couple	FULL PARTICIPANT
MVIE08032307	FEMININ	.	.	1	0	97	.	Missing	Missing	Missing	Missing	Missing	missing	Missing	NON PARTICIPANT
MVIE08032408	FEMININ	.	.	0	0	68	.	Missing	Missing	Missing	Missing	Missing	missing	Missing	NON PARTICIPANT
MVIE08032509	FEMININ	.	.	0	1	94	.	Missing	Missing	Missing	Missing	Missing	missing	Missing	NON PARTICIPANT
MVIE08032610	MASCULIN	4	4	0	0	84	0	Yes	No	No	Missing	Missing	Secondary 1st cycle	Single	FULL PARTICIPANT
MVIE08032711	MASCULIN	2	1	0	0	67	1	No	No	No	Intermediate	As good as	Secondary 2nd cycle	Couple	FULL PARTICIPANT
MVIE08032812	MASCULIN	.	.	0	0	68	0	No	No	No	Good	As good as	Secondary 1st cycle	Family cohabitation	PARTIAL PARTICIPANT
MVIE08032913	MASCULIN	1	1	0	0	74	1	No	No	No	Good	Better	Secondary 1st cycle	Couple	FULL PARTICIPANT
MVIE08033014	MASCULIN	.	.	0	0	76	6	Yes	No	No	Good	As good as	Primary school	Couple	PARTIAL PARTICIPANT
MVIE08033115	MASCULIN	.	.	0	0	70	.	Missing	Missing	Missing	Missing	Missing	missing	Missing	NON PARTICIPANT
MVIE08033216	MASCULIN	.	.	0	0	68	.	Missing	Missing	Missing	Missing	Missing	missing	Missing	NON PARTICIPANT
MVIE08033317	MASCULIN	.	.	0	0	68	6	No	Yes	No	Good	Missing	Secondary 1st cycle	Couple	PARTIAL PARTICIPANT
MVIE08033418	MASCULIN	.	.	1	0	74	.	Missing	Missing	Missing	Missing	Missing	missing	Missing	PARTIAL PARTICIPANT
MVIE08033519	MASCULIN	.	.	0	0	74	.	Missing	Missing	Missing	Missing	Missing	missing	Missing	NON PARTICIPANT
MVIE08033620	MASCULIN	.	.	0	0	67	.	Missing	Missing	Missing	Missing	Missing	missing	Missing	NON PARTICIPANT
MVIE08033721	MASCULIN	.	.	0	0	66	.	Missing	Missing	Missing	Missing	Missing	missing	Missing	NON PARTICIPANT
MVIE08033822	MASCULIN	2	0	0	0	69	1	No	No	No	Very good	Better	Secondary 1st cycle	Couple	FULL PARTICIPANT
MVIE08033923	MASCULIN	.	.	0	0	68	.	Missing	Missing	Missing	Missing	Missing	missing	Missing	NON PARTICIPANT
MVIE08034024	MASCULIN	.	.	0	0	83	.	Missing	Missing	Missing	Missing	Missing	missing	Missing	NON PARTICIPANT
MVIE08034125	MASCULIN	.	.	0	0	71	.	Missing	Missing	Missing	Missing	Missing	missing	Missing	NON PARTICIPANT
MVIE08034226	MASCULIN	.	.	1	1	83	.	Yes	No	No	Intermediate	Do not know	Primary school	Couple	FULL PARTICIPANT
MVIE08034327	MASCULIN	.	.	0	0	66	1	No	No	No	Good	As good as	Secondary 2nd cycle	Single	PARTIAL PARTICIPANT
MVIE08034428	MASCULIN	2	1	0	0	72	1	No	No	No	Good	Better	Primary school	Single	FULL PARTICIPANT
MVIE08034529	MASCULIN	7	2	0	0	66	0	No	No	No	Good	Better	Higher education - University	Couple	FULL PARTICIPANT
MVIE08034630	MASCULIN	.	.	0	0	79	.	Missing	Missing	Missing	Missing	Missing	missing	Missing	NON PARTICIPANT
MVIE08034731	MASCULIN	.	.	0	0	84	.	Missing	Missing	Missing	Missing	Missing	missing	Missing	NON PARTICIPANT
MVIE08034832	MASCULIN	.	.	0	0	67	.	Missing	Missing	Missing	Missing	Missing	missing	Missing	NON PARTICIPANT
MVIE08034933	MASCULIN	.	.	0	0	78	.	Missing	Missing	Missing	Missing	Missing	missing	Missing	NON PARTICIPANT
MVIE08035034	MASCULIN	2	3	0	0	75	2	No	No	No	Intermediate	Better	Secondary 2nd cycle	Couple	FULL PARTICIPANT
MVIE08035135	MASCULIN	.	.	0	0	79	5	Yes	No	No	Intermediate	Worse	Primary school	Couple	PARTIAL PARTICIPANT
MVIE08035236	MASCULIN	.	.	0	0	77	1	Yes	No	No	Intermediate	As good as	Secondary 1st cycle	Single	PARTIAL PARTICIPANT
MVIE08035337	MASCULIN	.	.	1	0	69	.	Missing	Missing	Missing	Missing	Missing	missing	Missing	NON PARTICIPANT
MVIE08035438	MASCULIN	.	.	1	0	85	.	Missing	Missing	Missing	Missing	Missing	missing	Missing	NON PARTICIPANT
MVIE08035539	MASCULIN	.	.	0	0	90	.	Missing	Missing	Missing	Missing	Missing	missing	Missing	NON PARTICIPANT
MVIE08035640	MASCULIN	.	.	0	0	79	.	Missing	Missing	Missing	Missing	Missing	missing	Missing	NON PARTICIPANT
MVIE08035741	MASCULIN	.	.	0	0	77	.	Missing	Missing	Missing	Missing	Missing	missing	Missing	NON PARTICIPANT
MVIE08035842	MASCULIN	1	0	0	0	73	0	No	No	No	Good	Better	Higher education - University	Couple	FULL PARTICIPANT
MVIE08035943	MASCULIN	.	.	0	0	79	.	Missing	Missing	Missing	Missing	Missing	missing	Missing	NON PARTICIPANT
MVIE08036044	MASCULIN	.	.	0	0	72	.	Missing	Missing	Missing	Missing	Missing	missing	Missing	NON PARTICIPANT
MVIE08036145	MASCULIN	.	.	0	0	81	0	No	Yes	No	Very good	Better	Primary school	Family cohabitation	PARTIAL PARTICIPANT
MVIE08036246	MASCULIN	.	.	0	0	66	.	Missing	Missing	Missing	Missing	Missing	missing	Missing	NON PARTICIPANT
MVIE08036347	MASCULIN	.	.	0	0	78	0	No	No	No	Intermediate	Do not know	Primary school	Couple	PARTIAL PARTICIPANT
MVIE08036448	MASCULIN	8	2	0	0	77	3	No	Yes	No	Intermediate	Better	Higher education (short)	Couple	FULL PARTICIPANT
MVIE08036549	MASCULIN	4	6	0	1	88	4	No	Yes	No	Good	As good as	Primary school	Couple	FULL PARTICIPANT
MVIE08036650	MASCULIN	.	.	1	0	87	.	Missing	Missing	Missing	Missing	Missing	missing	Missing	NON PARTICIPANT
MVIE08036751	MASCULIN	.	.	0	0	71	.	Missing	Missing	Missing	Missing	Missing	missing	Missing	NON PARTICIPANT
MVIE08036852	MASCULIN	.	.	0	0	78	.	Missing	Missing	Missing	Missing	Missing	missing	Missing	NON PARTICIPANT
MVIE08036953	MASCULIN	.	.	0	0	89	.	Missing	Missing	Missing	Missing	Missing	missing	Missing	NON PARTICIPANT
MVIE08037054	MASCULIN	.	.	0	0	70	.	Missing	Missing	Missing	Missing	Missing	missing	Missing	NON PARTICIPANT
MVIE08037155	MASCULIN	.	.	0	0	74	.	Missing	Missing	Missing	Missing	Missing	missing	Missing	NON PARTICIPANT
MVIE08037256	MASCULIN	.	.	1	0	87	.	Missing	Missing	Missing	Missing	Missing	missing	Missing	NON PARTICIPANT
MVIE08037357	MASCULIN	.	.	0	0	71	.	Missing	Missing	Missing	Missing	Missing	missing	Missing	NON PARTICIPANT
MVIE08037458	MASCULIN	.	.	0	0	73	.	Missing	Missing	Missing	Missing	Missing	missing	Missing	NON PARTICIPANT
MVIE08037559	MASCULIN	.	.	0	0	73	.	Missing	Missing	Missing	Missing	Missing	missing	Missing	NON PARTICIPANT
MVIE08037660	MASCULIN	.	.	0	0	68	.	Missing	Missing	Missing	Missing	Missing	missing	Missing	NON PARTICIPANT
MVIE08037761	MASCULIN	.	.	0	1	78	.	Missing	Missing	Missing	Missing	Missing	missing	Missing	NON PARTICIPANT
MVIE08037862	MASCULIN	.	.	0	0	77	0	No	Yes	No	Intermediate	As good as	Primary school	Couple	PARTIAL PARTICIPANT
MVIE08037963	MASCULIN	.	.	0	0	74	.	Missing	Missing	Missing	Missing	Missing	missing	Missing	NON PARTICIPANT
MVIE08038064	MASCULIN	.	.	0	1	66	.	Missing	Missing	Missing	Missing	Missing	missing	Missing	NON PARTICIPANT
MVIE08038165	MASCULIN	22	2	0	0	68	2	No	No	No	Intermediate	As good as	Higher education (short)	Couple	FULL PARTICIPANT
MVIE08038266	MASCULIN	.	.	0	0	73	.	Missing	Missing	Missing	Missing	Missing	missing	Missing	NON PARTICIPANT
MVIE08038367	MASCULIN	.	.	0	0	66	.	Missing	Missing	Missing	Missing	Missing	missing	Missing	NON PARTICIPANT
MVIE08038468	MASCULIN	0	0	0	0	74	0	No	No	No	Good	Better	Higher education - University	Couple	FULL PARTICIPANT
MVIE08038569	MASCULIN	.	.	0	0	70	.	Missing	Missing	Missing	Missing	Missing	missing	Missing	NON PARTICIPANT
MVIE08038670	MASCULIN	.	.	0	0	71	.	Missing	Missing	Missing	Missing	Missing	missing	Missing	NON PARTICIPANT
MVIE08038771	MASCULIN	2	3	0	0	76	0	No	No	No	Good	As good as	Primary school	Couple	FULL PARTICIPANT
MVIE08038872	MASCULIN	.	.	0	0	66	.	Missing	Missing	Missing	Missing	Missing	missing	Missing	NON PARTICIPANT
MVIE08038973	MASCULIN	1	2	0	0	79	2	No	No	No	Good	As good as	Primary school	Couple	FULL PARTICIPANT
MVIE08039074	MASCULIN	.	.	0	0	67	.	Missing	Missing	Missing	Missing	Missing	missing	Missing	NON PARTICIPANT
MVIE08039175	MASCULIN	0	0	0	0	67	0	No	No	No	Very good	As good as	Secondary 2nd cycle	Couple	FULL PARTICIPANT
MVIE08039276	MASCULIN	.	.	0	0	67	.	Missing	Missing	Missing	Missing	Missing	missing	Missing	NON PARTICIPANT
MVIE08039377	MASCULIN	.	.	1	0	89	.	Missing	Missing	Missing	Missing	Missing	missing	Missing	NON PARTICIPANT
MVIE08039478	MASCULIN	.	.	0	0	76	2	No	No	No	Good	Do not know	Secondary 1st cycle	Family cohabitation	PARTIAL PARTICIPANT
MVIE08039579	MASCULIN	.	.	0	0	82	.	Missing	Missing	Missing	Missing	Missing	missing	Missing	NON PARTICIPANT
MVIE08039680	MASCULIN	.	.	0	0	79	0	No	No	No	Good	As good as	Primary school	Couple	PARTIAL PARTICIPANT
MVIE08039781	MASCULIN	.	.	0	0	85	2	No	No	No	Intermediate	Better	Secondary 2nd cycle	Couple	PARTIAL PARTICIPANT
MVIE08039882	MASCULIN	.	.	0	0	78	.	Missing	Missing	Missing	Missing	Missing	missing	Missing	NON PARTICIPANT
MVIE08039983	MASCULIN	.	.	0	0	77	.	Missing	Missing	Missing	Missing	Missing	missing	Missing	NON PARTICIPANT
MVIE08040084	MASCULIN	.	.	0	0	80	.	Missing	Missing	Missing	Missing	Missing	missing	Missing	NON PARTICIPANT
MVIE08040185	FEMININ	.	.	0	0	99	.	Missing	Missing	Missing	Missing	Missing	missing	Missing	NON PARTICIPANT
MVIE08040286	FEMININ	.	.	0	0	67	.	Missing	Missing	Missing	Missing	Missing	missing	Missing	NON PARTICIPANT
MVIE08040387	FEMININ	.	.	0	0	87	.	Missing	Missing	Missing	Missing	Missing	missing	Missing	NON PARTICIPANT
MVIE08040488	FEMININ	.	.	0	0	91	.	Missing	Missing	Missing	Missing	Missing	missing	Missing	NON PARTICIPANT
MVIE08040589	FEMININ	.	.	0	0	75	.	Missing	Missing	Missing	Missing	Missing	missing	Missing	NON PARTICIPANT
MVIE08040690	FEMININ	.	.	0	0	77	.	Missing	Missing	Missing	Missing	Missing	missing	Missing	NON PARTICIPANT
MVIE08040791	FEMININ	.	.	0	0	75	.	Missing	Missing	Missing	Missing	Missing	missing	Missing	NON PARTICIPANT
MVIE08040892	FEMININ	.	.	0	0	91	.	Missing	Missing	Missing	Missing	Missing	missing	Missing	NON PARTICIPANT
MVIE08040993	FEMININ	.	.	0	1	84	.	Missing	Missing	Missing	Missing	Missing	missing	Missing	NON PARTICIPANT
MVIE08041094	FEMININ	.	.	0	0	68	.	Missing	Missing	Missing	Missing	Missing	missing	Missing	NON PARTICIPANT
MVIE08041195	FEMININ	0	2	0	0	66	1	No	No	No	Good	As good as	Higher education (short)	Single	FULL PARTICIPANT
MVIE08041296	FEMININ	.	.	0	1	88	.	Missing	Missing	Missing	Missing	Missing	missing	Missing	NON PARTICIPANT
MVIE08041300	FEMININ	.	.	0	0	69	.	Missing	Missing	Missing	Missing	Missing	missing	Missing	NON PARTICIPANT
MVIE08041401	FEMININ	.	.	0	0	76	.	Missing	Missing	Missing	Missing	Missing	missing	Missing	NON PARTICIPANT
MVIE08041502	FEMININ	.	.	0	0	81	.	Missing	Missing	Missing	Missing	Missing	missing	Missing	NON PARTICIPANT
MVIE08041603	FEMININ	.	.	0	0	86	.	Missing	Missing	Missing	Missing	Missing	missing	Missing	NON PARTICIPANT
MVIE08041704	FEMININ	.	.	0	0	79	.	Missing	Missing	Missing	Missing	Missing	missing	Missing	NON PARTICIPANT
MVIE08041805	FEMININ	.	.	0	0	82	.	Missing	Missing	Missing	Missing	Missing	missing	Missing	NON PARTICIPANT
MVIE08041906	FEMININ	.	.	0	0	75	.	Missing	Missing	Missing	Missing	Missing	missing	Missing	NON PARTICIPANT
MVIE08042007	FEMININ	.	.	0	0	80	.	Missing	Missing	Missing	Missing	Missing	missing	Missing	NON PARTICIPANT
MVIE08042108	FEMININ	8	3	0	1	75	4	No	No	No	Good	Better	Primary school	Couple	FULL PARTICIPANT
MVIE08042209	FEMININ	.	.	0	0	76	.	Missing	Missing	Missing	Missing	Missing	missing	Missing	NON PARTICIPANT
MVIE08042310	FEMININ	.	.	0	0	73	.	Missing	Missing	Missing	Missing	Missing	missing	Missing	NON PARTICIPANT
MVIE08042411	FEMININ	.	.	0	0	66	.	Missing	Missing	Missing	Missing	Missing	missing	Missing	NON PARTICIPANT
MVIE08042512	FEMININ	.	.	0	0	73	0	No	No	No	Intermediate	Do not know	No schooling	Family cohabitation	PARTIAL PARTICIPANT
MVIE08042613	FEMININ	2	2	0	0	67	0	No	Yes	No	Good	As good as	Secondary 1st cycle	Couple	FULL PARTICIPANT
MVIE08042714	FEMININ	.	.	0	0	82	.	Missing	Missing	Missing	Missing	Missing	missing	Missing	NON PARTICIPANT
MVIE08042815	FEMININ	.	.	0	0	76	4	No	No	No	Intermediate	As good as	No schooling	Couple	PARTIAL PARTICIPANT
MVIE08042916	FEMININ	.	.	0	0	79	.	Missing	Missing	Missing	Missing	Missing	missing	Missing	NON PARTICIPANT
MVIE08043017	FEMININ	.	.	0	0	89	.	Missing	Missing	Missing	Missing	Missing	missing	Missing	NON PARTICIPANT
MVIE08043118	FEMININ	2	2	0	0	67	4	No	No	No	Good	Better	Higher education - University	Couple	FULL PARTICIPANT
MVIE08043219	FEMININ	.	.	0	1	92	.	Missing	Missing	Missing	Missing	Missing	missing	Missing	NON PARTICIPANT
MVIE08043320	FEMININ	.	.	0	0	69	.	Missing	Missing	Missing	Missing	Missing	missing	Missing	NON PARTICIPANT
MVIE08043421	FEMININ	.	.	0	0	82	2	Do not know	No	No	Intermediate	Do not know	Secondary 2nd cycle	Couple	PARTIAL PARTICIPANT
MVIE08043522	FEMININ	.	.	0	0	79	.	Missing	Missing	Missing	Missing	Missing	missing	Missing	NON PARTICIPANT
MVIE08043623	FEMININ	10	2	0	0	79	1	Yes	No	No	Good	As good as	Primary school	Couple	FULL PARTICIPANT
MVIE08043724	FEMININ	7	3	0	0	81	3	No	No	No	Intermediate	As good as	Primary school	Family cohabitation	FULL PARTICIPANT
MVIE08043825	FEMININ	.	.	0	0	74	0	No	No	No	Bad	As good as	Primary school	Family cohabitation	PARTIAL PARTICIPANT
MVIE08043926	FEMININ	.	.	0	0	76	.	Missing	Missing	Missing	Missing	Missing	missing	Missing	NON PARTICIPANT
MVIE08044027	FEMININ	.	.	0	0	85	.	Missing	Missing	Missing	Missing	Missing	missing	Missing	NON PARTICIPANT
MVIE08044128	FEMININ	.	.	0	0	88	.	Missing	Missing	Missing	Missing	Missing	missing	Missing	NON PARTICIPANT
MVIE08044229	FEMININ	.	.	0	0	83	.	Missing	Missing	Missing	Missing	Missing	missing	Missing	NON PARTICIPANT
MVIE08044330	FEMININ	1	0	0	0	73	0	No	No	No	Missing	Missing	Secondary 1st cycle	Couple	FULL PARTICIPANT
MVIE08044431	FEMININ	.	.	0	0	82	0	Yes	No	No	Good	Better	Secondary 2nd cycle	Single	PARTIAL PARTICIPANT
MVIE08044532	FEMININ	7	3	0	0	77	3	No	No	No	Good	Better	Secondary 1st cycle	Family cohabitation	FULL PARTICIPANT
MVIE08044633	FEMININ	.	.	0	0	84	.	Missing	Missing	Missing	Missing	Missing	missing	Missing	NON PARTICIPANT
MVIE08044734	FEMININ	.	.	0	0	81	.	Missing	Missing	Missing	Missing	Missing	missing	Missing	NON PARTICIPANT
MVIE08044835	FEMININ	.	.	0	0	79	0	No	No	No	Good	Do not know	Primary school	Single	PARTIAL PARTICIPANT
MVIE08044936	FEMININ	.	.	1	0	87	.	Missing	Missing	Missing	Missing	Missing	missing	Missing	NON PARTICIPANT
MVIE08045037	FEMININ	.	.	0	1	70	0	No	No	No	Intermediate	As good as	Secondary 1st cycle	Single	PARTIAL PARTICIPANT
MVIE08045138	FEMININ	.	.	0	0	89	.	Missing	Missing	Missing	Missing	Missing	missing	Missing	NON PARTICIPANT
MVIE08045239	FEMININ	.	.	0	0	82	.	Missing	Missing	Missing	Missing	Missing	missing	Missing	NON PARTICIPANT
MVIE08045340	FEMININ	.	.	0	0	69	1	Do not know	Yes	Yes	Very good	Worse	Secondary 1st cycle	Couple	PARTIAL PARTICIPANT
MVIE08045441	FEMININ	.	.	0	0	69	.	Missing	Missing	Missing	Missing	Missing	missing	Missing	NON PARTICIPANT
MVIE08045542	FEMININ	9	1	0	0	69	0	No	No	No	Intermediate	Better	Secondary 1st cycle	Family cohabitation	FULL PARTICIPANT
MVIE08045643	FEMININ	.	.	0	1	84	.	Missing	Missing	Missing	Missing	Missing	missing	Missing	NON PARTICIPANT
MVIE08045744	FEMININ	14	4	0	0	80	1	Yes	No	No	Good	As good as	Secondary 2nd cycle	Single	FULL PARTICIPANT
MVIE08045845	FEMININ	5	1	0	0	67	0	No	No	No	Good	As good as	Secondary 2nd cycle	Couple	FULL PARTICIPANT
MVIE08045946	FEMININ	7	0	0	0	68	0	Yes	Yes	Yes	Good	Better	Secondary 2nd cycle	Couple	FULL PARTICIPANT
MVIE08046047	FEMININ	2	2	0	0	70	0	No	No	No	Good	Better	Secondary 1st cycle	Single	FULL PARTICIPANT
MVIE08046148	FEMININ	.	.	0	0	88	2	No	No	No	Very good	Better	Secondary 2nd cycle	Single	PARTIAL PARTICIPANT
MVIE08046249	FEMININ	.	.	0	0	77	.	Missing	Missing	Missing	Missing	Missing	missing	Missing	NON PARTICIPANT
MVIE08046350	FEMININ	.	.	0	0	74	.	Missing	Missing	Missing	Missing	Missing	missing	Missing	NON PARTICIPANT
MVIE08046451	FEMININ	.	.	0	0	75	.	Missing	Missing	Missing	Missing	Missing	missing	Missing	NON PARTICIPANT
MVIE08046552	FEMININ	.	.	0	0	70	.	Missing	Missing	Missing	Missing	Missing	missing	Missing	NON PARTICIPANT
MVIE08046653	FEMININ	.	.	0	0	73	0	No	No	No	Good	Better	Primary school	Family cohabitation	PARTIAL PARTICIPANT
MVIE08046754	FEMININ	.	.	0	0	69	.	Missing	Missing	Missing	Missing	Missing	missing	Missing	NON PARTICIPANT
MVIE08046855	FEMININ	.	.	0	0	82	0	No	No	No	Very good	Do not know	Secondary 1st cycle	Single	PARTIAL PARTICIPANT
MVIE08046956	FEMININ	.	.	0	0	67	2	No	Yes	No	Good	Missing	Secondary 1st cycle	Couple	PARTIAL PARTICIPANT
MVIE08047057	FEMININ	.	.	0	0	85	0	No	No	No	Intermediate	Better	Primary school	Single	PARTIAL PARTICIPANT
MVIE08047158	FEMININ	.	.	0	0	70	.	Missing	Missing	Missing	Missing	Missing	missing	Missing	NON PARTICIPANT
MVIE08047259	FEMININ	.	.	0	0	80	1	No	No	No	Good	As good as	Primary school	Couple	PARTIAL PARTICIPANT
MVIE08047360	FEMININ	.	.	0	0	72	.	Missing	Missing	Missing	Missing	Missing	missing	Missing	NON PARTICIPANT
MVIE08047461	FEMININ	9	2	0	0	84	0	No	No	No	Intermediate	Better	Secondary 1st cycle	Single	FULL PARTICIPANT
MVIE08047562	FEMININ	9	2	0	0	82	1	No	No	No	Good	Better	Secondary 1st cycle	Non-family cohabitation	FULL PARTICIPANT
MVIE08047663	FEMININ	.	.	0	0	75	.	Missing	Missing	Missing	Missing	Missing	missing	Missing	NON PARTICIPANT
MVIE08047764	FEMININ	.	.	0	0	77	.	Missing	Missing	Missing	Missing	Missing	missing	Missing	NON PARTICIPANT
MVIE08047865	FEMININ	.	.	0	0	78	.	Missing	Missing	Missing	Missing	Missing	missing	Missing	NON PARTICIPANT
MVIE08047966	FEMININ	.	.	0	0	70	.	Missing	Missing	Missing	Missing	Missing	missing	Missing	NON PARTICIPANT
MVIE08048067	FEMININ	.	.	0	0	73	.	Missing	Missing	Missing	Missing	Missing	missing	Missing	NON PARTICIPANT
MVIE08048168	FEMININ	.	.	0	0	75	.	Missing	Missing	Missing	Missing	Missing	missing	Missing	NON PARTICIPANT
MVIE08048269	FEMININ	.	.	0	0	66	.	Missing	Missing	Missing	Missing	Missing	missing	Missing	NON PARTICIPANT
MVIE08048370	FEMININ	.	.	0	0	80	.	Missing	Missing	Missing	Missing	Missing	missing	Missing	NON PARTICIPANT
MVIE08048471	FEMININ	.	.	0	0	79	.	Missing	Missing	Missing	Missing	Missing	missing	Missing	NON PARTICIPANT
MVIE08048572	FEMININ	.	.	0	0	71	.	Missing	Missing	Missing	Missing	Missing	missing	Missing	NON PARTICIPANT
MVIE08048673	FEMININ	.	.	0	1	90	.	Missing	Missing	Missing	Missing	Missing	missing	Missing	NON PARTICIPANT
MVIE08048774	FEMININ	.	.	0	0	77	4	No	Yes	No	Good	As good as	Primary school	Single	PARTIAL PARTICIPANT
MVIE08048875	FEMININ	8	1	0	0	73	2	No	No	No	Good	Better	Secondary 1st cycle	Couple	FULL PARTICIPANT
MVIE08048976	FEMININ	.	.	0	0	89	.	Missing	Missing	Missing	Missing	Missing	missing	Missing	NON PARTICIPANT
MVIE08049077	FEMININ	.	.	0	0	79	.	Missing	Missing	Missing	Missing	Missing	missing	Missing	NON PARTICIPANT
MVIE08049178	FEMININ	4	8	0	0	79	2	No	No	No	Intermediate	Better	Secondary 1st cycle	Couple	FULL PARTICIPANT
MVIE08049279	FEMININ	.	.	1	0	92	.	Missing	Missing	Missing	Missing	Missing	missing	Missing	NON PARTICIPANT
MVIE08049380	FEMININ	.	.	0	0	67	.	Missing	Missing	Missing	Missing	Missing	missing	Missing	NON PARTICIPANT
MVIE08049481	FEMININ	1	1	0	0	80	1	No	No	No	Good	Better	Secondary 2nd cycle	Non-family cohabitation	FULL PARTICIPANT
MVIE08049582	FEMININ	.	.	0	0	72	.	Missing	Missing	Missing	Missing	Missing	missing	Missing	NON PARTICIPANT
MVIE08049683	FEMININ	.	.	0	0	72	.	Missing	Missing	Missing	Missing	Missing	missing	Missing	NON PARTICIPANT
MVIE08049784	FEMININ	.	.	0	0	78	0	No	No	No	Good	Better	Primary school	Couple	PARTIAL PARTICIPANT
MVIE08049885	FEMININ	.	.	0	0	78	.	Missing	Missing	Missing	Missing	Missing	missing	Missing	NON PARTICIPANT
MVIE08049986	FEMININ	.	.	0	0	81	.	Missing	Missing	Missing	Missing	Missing	missing	Missing	NON PARTICIPANT
MVIE08050087	FEMININ	.	.	0	0	68	0	No	No	No	Intermediate	As good as	Primary school	Couple	PARTIAL PARTICIPANT
MVIE08050188	FEMININ	.	.	0	0	78	.	Missing	Missing	Missing	Missing	Missing	missing	Missing	NON PARTICIPANT
MVIE08050289	FEMININ	.	.	0	0	78	.	Missing	Missing	Missing	Missing	Missing	missing	Missing	NON PARTICIPANT
MVIE08050390	FEMININ	2	2	0	0	69	0	No	No	No	Good	As good as	Secondary 1st cycle	Couple	FULL PARTICIPANT
MVIE08050491	FEMININ	4	2	0	0	82	1	Yes	No	No	Intermediate	As good as	Secondary 1st cycle	Single	FULL PARTICIPANT
MVIE08050592	FEMININ	.	.	0	0	67	.	Missing	Missing	Missing	Missing	Missing	missing	Missing	NON PARTICIPANT
MVIE08050693	FEMININ	.	.	0	0	66	.	Missing	Missing	Missing	Missing	Missing	missing	Missing	NON PARTICIPANT
MVIE08050794	FEMININ	.	.	1	0	81	.	Missing	Missing	Missing	Missing	Missing	missing	Missing	NON PARTICIPANT
MVIE08050895	FEMININ	.	.	0	0	75	.	Missing	Missing	Missing	Missing	Missing	missing	Missing	NON PARTICIPANT
MVIE08050996	FEMININ	2	3	0	0	79	5	No	No	No	Good	Better	Secondary 1st cycle	Couple	FULL PARTICIPANT
MVIE08051000	FEMININ	.	.	0	0	83	.	Missing	Missing	Missing	Missing	Missing	missing	Missing	NON PARTICIPANT
MVIE08051101	FEMININ	.	.	0	0	70	.	Missing	Missing	Missing	Missing	Missing	missing	Missing	NON PARTICIPANT
MVIE08051202	FEMININ	.	.	0	0	75	.	Missing	Missing	Missing	Missing	Missing	missing	Missing	NON PARTICIPANT
MVIE08051303	FEMININ	13	9	0	0	72	7	Yes	Yes	Yes	Bad	Worse	Secondary 1st cycle	Couple	FULL PARTICIPANT
MVIE08051404	FEMININ	.	.	0	0	66	.	Missing	Missing	Missing	Missing	Missing	missing	Missing	NON PARTICIPANT
MVIE08051505	FEMININ	.	.	0	0	73	.	Missing	Missing	Missing	Missing	Missing	missing	Missing	NON PARTICIPANT
MVIE08051606	FEMININ	.	.	0	0	71	.	Missing	Missing	Missing	Missing	Missing	missing	Missing	NON PARTICIPANT
MVIE08051707	MASCULIN	.	.	1	0	94	.	Missing	Missing	Missing	Missing	Missing	missing	Missing	NON PARTICIPANT
MVIE08051808	MASCULIN	4	.	1	0	74	2	No	No	No	Good	Better	Secondary 2nd cycle	Single	FULL PARTICIPANT
MVIE08051909	MASCULIN	.	.	0	0	72	.	Missing	Missing	Missing	Missing	Missing	missing	Missing	NON PARTICIPANT
MVIE08052010	MASCULIN	.	.	0	0	71	.	Missing	Missing	Missing	Missing	Missing	missing	Missing	NON PARTICIPANT
MVIE08052111	MASCULIN	.	.	0	0	68	.	Missing	Missing	Missing	Missing	Missing	missing	Missing	NON PARTICIPANT
MVIE08052212	MASCULIN	.	.	0	0	69	.	Missing	Missing	Missing	Missing	Missing	missing	Missing	NON PARTICIPANT
MVIE08052313	MASCULIN	10	2	0	0	83	0	No	No	No	Intermediate	As good as	Secondary 2nd cycle	Couple	FULL PARTICIPANT
MVIE08052414	MASCULIN	.	.	0	0	74	.	Missing	Missing	Missing	Missing	Missing	missing	Missing	NON PARTICIPANT
MVIE08052515	MASCULIN	.	.	1	0	83	.	Missing	Missing	Missing	Missing	Missing	missing	Missing	NON PARTICIPANT
MVIE08052616	MASCULIN	.	.	0	0	74	.	Missing	Missing	Missing	Missing	Missing	missing	Missing	NON PARTICIPANT
MVIE08052717	MASCULIN	.	.	0	0	70	.	Missing	Missing	Missing	Missing	Missing	missing	Missing	NON PARTICIPANT
MVIE08052818	MASCULIN	.	.	0	0	71	0	No	No	No	Good	Do not know	Secondary 1st cycle	Couple	PARTIAL PARTICIPANT
MVIE08052919	MASCULIN	.	.	0	0	77	.	Missing	Missing	Missing	Missing	Missing	missing	Missing	NON PARTICIPANT
MVIE08053020	MASCULIN	0	3	1	0	82	3	No	No	No	Good	Better	Primary school	Family cohabitation	FULL PARTICIPANT
MVIE08053121	MASCULIN	.	.	0	0	69	.	Missing	Missing	Missing	Missing	Missing	missing	Missing	NON PARTICIPANT
MVIE08053222	MASCULIN	.	.	0	0	69	0	No	No	No	Good	As good as	No schooling	Couple	PARTIAL PARTICIPANT
MVIE08053323	MASCULIN	.	.	0	0	88	.	Missing	Missing	Missing	Missing	Missing	missing	Missing	NON PARTICIPANT
MVIE08053424	MASCULIN	.	.	0	0	68	.	Missing	Missing	Missing	Missing	Missing	missing	Missing	NON PARTICIPANT
MVIE08053525	MASCULIN	.	.	0	0	82	.	Missing	Missing	Missing	Missing	Missing	missing	Missing	NON PARTICIPANT
MVIE08053626	MASCULIN	.	.	0	0	73	.	Missing	Missing	Missing	Missing	Missing	missing	Missing	NON PARTICIPANT
MVIE08053727	MASCULIN	.	.	0	0	71	.	Missing	Missing	Missing	Missing	Missing	missing	Missing	NON PARTICIPANT
MVIE08053828	MASCULIN	.	.	1	0	71	.	Missing	Missing	Missing	Missing	Missing	missing	Missing	NON PARTICIPANT
MVIE08053929	MASCULIN	.	.	0	0	67	.	Missing	Missing	Missing	Missing	Missing	missing	Missing	NON PARTICIPANT
MVIE08054030	MASCULIN	.	.	0	0	68	.	Missing	Missing	Missing	Missing	Missing	missing	Missing	NON PARTICIPANT
MVIE08054131	MASCULIN	.	.	0	0	77	.	Missing	Missing	Missing	Missing	Missing	missing	Missing	NON PARTICIPANT
MVIE08054232	MASCULIN	.	.	0	0	77	.	Missing	Missing	Missing	Missing	Missing	missing	Missing	NON PARTICIPANT
MVIE08054333	MASCULIN	.	.	0	0	75	4	No	No	No	Very good	As good as	Primary school	Couple	PARTIAL PARTICIPANT
MVIE08054434	MASCULIN	.	.	0	0	77	.	Missing	Missing	Missing	Missing	Missing	missing	Missing	NON PARTICIPANT
MVIE08054535	MASCULIN	.	.	1	0	83	.	Missing	Missing	Missing	Missing	Missing	missing	Missing	NON PARTICIPANT
MVIE08054636	MASCULIN	.	.	0	0	74	.	Missing	Missing	Missing	Missing	Missing	missing	Missing	NON PARTICIPANT
MVIE08054737	MASCULIN	.	.	0	0	75	.	Missing	Missing	Missing	Missing	Missing	missing	Missing	NON PARTICIPANT
MVIE08054838	MASCULIN	.	.	0	0	69	.	Missing	Missing	Missing	Missing	Missing	missing	Missing	NON PARTICIPANT
MVIE08054939	MASCULIN	.	.	0	0	78	.	Missing	Missing	Missing	Missing	Missing	missing	Missing	NON PARTICIPANT
MVIE08055040	MASCULIN	.	.	0	0	86	.	Missing	Missing	Missing	Missing	Missing	missing	Missing	NON PARTICIPANT
MVIE08055141	MASCULIN	.	.	1	0	75	.	Missing	Missing	Missing	Missing	Missing	missing	Missing	NON PARTICIPANT
MVIE08055242	MASCULIN	.	.	0	0	69	.	Missing	Missing	Missing	Missing	Missing	missing	Missing	NON PARTICIPANT
MVIE08055343	MASCULIN	.	.	0	0	74	0	No	No	No	Very good	Better	Secondary 2nd cycle	Couple	PARTIAL PARTICIPANT
MVIE08055444	MASCULIN	.	.	0	1	81	5	No	No	No	Intermediate	As good as	Primary school	Family cohabitation	FULL PARTICIPANT
MVIE08055545	MASCULIN	.	.	0	0	86	.	Missing	Missing	Missing	Missing	Missing	missing	Missing	NON PARTICIPANT
MVIE08055646	MASCULIN	.	.	0	0	79	.	Missing	Missing	Missing	Missing	Missing	missing	Missing	NON PARTICIPANT
MVIE08055747	MASCULIN	.	.	0	0	86	.	Missing	Missing	Missing	Missing	Missing	missing	Missing	NON PARTICIPANT
MVIE08055848	MASCULIN	.	.	0	0	76	.	Missing	Missing	Missing	Missing	Missing	missing	Missing	NON PARTICIPANT
MVIE08055949	MASCULIN	.	.	0	0	79	.	Missing	Missing	Missing	Missing	Missing	missing	Missing	NON PARTICIPANT
MVIE08056050	MASCULIN	.	.	0	0	73	.	Missing	Missing	Missing	Missing	Missing	missing	Missing	NON PARTICIPANT
MVIE08056151	MASCULIN	.	.	0	0	74	.	Missing	Missing	Missing	Missing	Missing	missing	Missing	NON PARTICIPANT
MVIE08056252	MASCULIN	.	.	0	0	71	.	Missing	Missing	Missing	Missing	Missing	missing	Missing	NON PARTICIPANT
MVIE08056353	MASCULIN	.	.	0	0	66	0	No	No	No	Good	Better	Higher education - University	Couple	PARTIAL PARTICIPANT
MVIE08056454	MASCULIN	.	.	0	0	74	.	Missing	Missing	Missing	Missing	Missing	missing	Missing	NON PARTICIPANT
MVIE08056555	MASCULIN	.	.	0	0	75	.	Missing	Missing	Missing	Missing	Missing	missing	Missing	NON PARTICIPANT
MVIE08056656	MASCULIN	.	.	0	0	77	.	Missing	Missing	Missing	Missing	Missing	missing	Missing	NON PARTICIPANT
MVIE08056757	MASCULIN	.	.	0	0	74	.	Missing	Missing	Missing	Missing	Missing	missing	Missing	NON PARTICIPANT
MVIE08056858	MASCULIN	6	0	0	0	67	1	No	No	No	Good	As good as	Higher education - University	Couple	FULL PARTICIPANT
MVIE08056959	MASCULIN	.	.	0	0	78	.	Missing	Missing	Missing	Missing	Missing	missing	Missing	NON PARTICIPANT
MVIE08057060	MASCULIN	.	.	0	0	70	.	Missing	Missing	Missing	Missing	Missing	missing	Missing	NON PARTICIPANT
MVIE08057161	MASCULIN	.	.	0	0	69	.	Missing	Missing	Missing	Missing	Missing	missing	Missing	NON PARTICIPANT
MVIE08057262	MASCULIN	.	.	0	0	66	.	Missing	Missing	Missing	Missing	Missing	missing	Missing	NON PARTICIPANT
MVIE08057363	MASCULIN	.	.	0	0	77	.	Missing	Missing	Missing	Missing	Missing	missing	Missing	NON PARTICIPANT
MVIE08057464	MASCULIN	.	.	0	0	68	.	Missing	Missing	Missing	Missing	Missing	missing	Missing	NON PARTICIPANT
MVIE08057565	MASCULIN	.	.	1	0	88	.	Missing	Missing	Missing	Missing	Missing	missing	Missing	NON PARTICIPANT
MVIE08057666	MASCULIN	.	.	0	0	70	.	Missing	Missing	Missing	Missing	Missing	missing	Missing	NON PARTICIPANT
MVIE08057767	MASCULIN	2	1	0	0	77	2	No	No	No	Good	As good as	Primary school	Couple	FULL PARTICIPANT
MVIE08057868	MASCULIN	.	.	1	0	72	.	Missing	Missing	Missing	Missing	Missing	missing	Missing	NON PARTICIPANT
MVIE08057969	MASCULIN	.	.	0	1	69	.	Missing	Missing	Missing	Missing	Missing	missing	Missing	NON PARTICIPANT
MVIE08058070	MASCULIN	.	.	0	0	79	.	Missing	Missing	Missing	Missing	Missing	missing	Missing	NON PARTICIPANT
MVIE08058171	MASCULIN	1	0	0	0	78	0	No	No	No	Intermediate	Better	Secondary 2nd cycle	Couple	FULL PARTICIPANT
MVIE08058272	MASCULIN	.	.	0	0	72	.	Missing	Missing	Missing	Missing	Missing	missing	Missing	NON PARTICIPANT
MVIE08058373	MASCULIN	.	.	0	0	79	.	Missing	Missing	Missing	Missing	Missing	missing	Missing	NON PARTICIPANT
MVIE08058474	MASCULIN	.	.	0	0	82	.	Missing	Missing	Missing	Missing	Missing	missing	Missing	NON PARTICIPANT
MVIE08058575	MASCULIN	.	.	0	0	79	.	Missing	Missing	Missing	Missing	Missing	missing	Missing	NON PARTICIPANT
MVIE08058676	MASCULIN	.	.	0	0	84	.	Missing	Missing	Missing	Missing	Missing	missing	Missing	NON PARTICIPANT
MVIE08058777	MASCULIN	2	0	0	0	70	1	No	No	No	Good	As good as	Higher education - University	Couple	FULL PARTICIPANT
MVIE08058878	MASCULIN	5	3	0	0	81	2	No	No	No	Good	As good as	Higher education - University	Couple	FULL PARTICIPANT
MVIE08058979	MASCULIN	1	1	0	0	80	0	No	No	No	Good	As good as	Primary school	Couple	FULL PARTICIPANT
MVIE08059080	MASCULIN	0	0	0	0	71	0	No	No	No	Very good	Better	Higher education - University	Couple	FULL PARTICIPANT
MVIE08059181	MASCULIN	2	4	0	0	89	1	Yes	Yes	No	Good	As good as	Secondary 1st cycle	Non-family cohabitation	FULL PARTICIPANT
MVIE08059282	MASCULIN	.	.	0	0	86	.	Missing	Missing	Missing	Missing	Missing	missing	Missing	NON PARTICIPANT
MVIE08059383	MASCULIN	.	.	0	0	73	.	Missing	Missing	Missing	Missing	Missing	missing	Missing	NON PARTICIPANT
MVIE08059484	MASCULIN	.	.	0	0	75	.	Missing	Missing	Missing	Missing	Missing	missing	Missing	NON PARTICIPANT
MVIE08059585	MASCULIN	.	.	0	0	67	.	Missing	Missing	Missing	Missing	Missing	missing	Missing	NON PARTICIPANT
MVIE08059686	MASCULIN	.	.	1	0	78	.	Missing	Missing	Missing	Missing	Missing	missing	Missing	PARTIAL PARTICIPANT
MVIE08059787	MASCULIN	.	.	1	0	91	.	Missing	Missing	Missing	Missing	Missing	missing	Missing	NON PARTICIPANT
MVIE08059888	MASCULIN	.	.	0	0	70	.	Missing	Missing	Missing	Missing	Missing	missing	Missing	NON PARTICIPANT
MVIE08059989	MASCULIN	.	.	0	0	73	.	Missing	Missing	Missing	Missing	Missing	missing	Missing	NON PARTICIPANT
MVIE08060090	FEMININ	.	.	0	0	72	.	Missing	Missing	Missing	Missing	Missing	missing	Missing	NON PARTICIPANT
MVIE08060191	FEMININ	.	.	0	0	80	.	Missing	Missing	Missing	Missing	Missing	missing	Missing	NON PARTICIPANT
MVIE08060292	FEMININ	2	0	0	0	74	3	Yes	Yes	No	Good	Better	Primary school	Couple	FULL PARTICIPANT
MVIE08060393	FEMININ	.	.	0	0	68	.	Missing	Missing	Missing	Missing	Missing	missing	Missing	NON PARTICIPANT
MVIE08060494	FEMININ	.	.	0	0	86	.	Missing	Missing	Missing	Missing	Missing	missing	Missing	NON PARTICIPANT
MVIE08060595	FEMININ	.	.	0	0	83	.	Missing	Missing	Missing	Missing	Missing	missing	Missing	NON PARTICIPANT
MVIE08060696	FEMININ	.	.	0	0	73	.	Missing	Missing	Missing	Missing	Missing	missing	Missing	NON PARTICIPANT
MVIE08060700	FEMININ	.	.	0	0	79	.	Missing	Missing	Missing	Missing	Missing	missing	Missing	NON PARTICIPANT
MVIE08060801	FEMININ	.	.	0	1	89	.	Missing	Missing	Missing	Missing	Missing	missing	Missing	NON PARTICIPANT
MVIE08060902	FEMININ	.	.	0	0	74	.	Missing	Missing	Missing	Missing	Missing	missing	Missing	NON PARTICIPANT
MVIE08061003	FEMININ	.	.	0	0	83	.	Missing	Missing	Missing	Missing	Missing	missing	Missing	NON PARTICIPANT
MVIE08061104	FEMININ	.	.	0	0	75	.	Missing	Missing	Missing	Missing	Missing	missing	Missing	NON PARTICIPANT
MVIE08061205	FEMININ	.	.	0	0	66	.	Missing	Missing	Missing	Missing	Missing	missing	Missing	NON PARTICIPANT
MVIE08061306	FEMININ	.	.	0	0	89	.	Missing	Missing	Missing	Missing	Missing	missing	Missing	NON PARTICIPANT
MVIE08061407	FEMININ	.	.	0	0	87	.	Missing	Missing	Missing	Missing	Missing	missing	Missing	NON PARTICIPANT
MVIE08061508	FEMININ	2	7	0	0	76	1	No	No	No	Very good	Better	Secondary 1st cycle	Single	FULL PARTICIPANT
MVIE08061609	FEMININ	.	.	0	1	85	.	Missing	Missing	Missing	Missing	Missing	missing	Missing	NON PARTICIPANT
MVIE08061710	FEMININ	.	.	0	0	80	.	Missing	Missing	Missing	Missing	Missing	missing	Missing	NON PARTICIPANT
MVIE08061811	FEMININ	.	.	0	0	75	.	Missing	Missing	Missing	Missing	Missing	missing	Missing	NON PARTICIPANT
MVIE08061912	FEMININ	.	.	1	0	71	.	Missing	Missing	Missing	Missing	Missing	missing	Missing	NON PARTICIPANT
MVIE08062013	FEMININ	.	.	0	0	84	.	Missing	Missing	Missing	Missing	Missing	missing	Missing	NON PARTICIPANT
MVIE08062114	FEMININ	.	.	0	0	75	5	No	No	No	Intermediate	As good as	Primary school	Couple	PARTIAL PARTICIPANT
MVIE08062215	FEMININ	.	.	0	0	75	.	Missing	Missing	Missing	Missing	Missing	missing	Missing	NON PARTICIPANT
MVIE08062316	FEMININ	.	.	0	0	86	.	Missing	Missing	Missing	Missing	Missing	missing	Missing	NON PARTICIPANT
MVIE08062417	FEMININ	.	.	0	0	70	.	Missing	Missing	Missing	Missing	Missing	missing	Missing	NON PARTICIPANT
MVIE08062518	FEMININ	0	6	0	0	76	3	Yes	No	No	Intermediate	As good as	Secondary 1st cycle	Couple	FULL PARTICIPANT
MVIE08062619	FEMININ	.	.	0	0	72	.	Missing	Missing	Missing	Missing	Missing	missing	Missing	NON PARTICIPANT
MVIE08062720	FEMININ	.	.	1	0	83	.	Missing	Missing	Missing	Missing	Missing	missing	Missing	NON PARTICIPANT
MVIE08062821	FEMININ	.	.	0	0	77	.	Missing	Missing	Missing	Missing	Missing	missing	Missing	NON PARTICIPANT
MVIE08062922	FEMININ	4	10	0	0	70	4	Yes	Yes	No	Bad	Do not know	Secondary 1st cycle	Couple	FULL PARTICIPANT
MVIE08063023	FEMININ	1	1	0	0	69	0	No	No	No	Good	Better	Secondary 1st cycle	Single	FULL PARTICIPANT
MVIE08063124	FEMININ	.	.	1	0	79	.	Missing	Missing	Missing	Missing	Missing	missing	Missing	NON PARTICIPANT
MVIE08063225	FEMININ	.	.	0	0	86	.	Missing	Missing	Missing	Missing	Missing	missing	Missing	NON PARTICIPANT
MVIE08063326	FEMININ	.	.	0	0	77	.	Missing	Missing	Missing	Missing	Missing	missing	Missing	NON PARTICIPANT
MVIE08063427	FEMININ	.	.	0	0	81	.	Missing	Missing	Missing	Missing	Missing	missing	Missing	NON PARTICIPANT
MVIE08063528	FEMININ	.	.	0	0	74	.	Missing	Missing	Missing	Missing	Missing	missing	Missing	NON PARTICIPANT
MVIE08063629	FEMININ	1	4	0	0	86	0	No	No	No	Good	As good as	Secondary 1st cycle	Single	FULL PARTICIPANT
MVIE08063730	FEMININ	.	.	0	0	75	.	Missing	Missing	Missing	Missing	Missing	missing	Missing	NON PARTICIPANT
MVIE08063831	FEMININ	.	.	0	0	90	.	Missing	Missing	Missing	Missing	Missing	missing	Missing	NON PARTICIPANT
MVIE08063932	FEMININ	.	.	0	0	72	.	Missing	Missing	Missing	Missing	Missing	missing	Missing	NON PARTICIPANT
MVIE08064033	FEMININ	.	.	0	0	74	.	Missing	Missing	Missing	Missing	Missing	missing	Missing	NON PARTICIPANT
MVIE08064134	FEMININ	.	.	0	0	75	0	No	No	No	Good	Do not know	Primary school	Couple	PARTIAL PARTICIPANT
MVIE08064235	FEMININ	.	.	0	0	85	0	Yes	No	No	Intermediate	Better	Secondary 1st cycle	Couple	PARTIAL PARTICIPANT
MVIE08064336	FEMININ	6	3	0	0	76	4	No	No	No	Intermediate	As good as	Primary school	Family cohabitation	FULL PARTICIPANT
MVIE08064437	FEMININ	.	.	0	0	72	.	Missing	Missing	Missing	Missing	Missing	missing	Missing	NON PARTICIPANT
MVIE08064538	FEMININ	.	.	0	0	77	.	Missing	Missing	Missing	Missing	Missing	missing	Missing	NON PARTICIPANT
MVIE08064639	FEMININ	.	.	0	0	71	.	Missing	Missing	Missing	Missing	Missing	missing	Missing	NON PARTICIPANT
MVIE08064740	FEMININ	.	.	0	0	74	.	Missing	Missing	Missing	Missing	Missing	missing	Missing	NON PARTICIPANT
MVIE08064841	FEMININ	.	.	0	0	70	.	Missing	Missing	Missing	Missing	Missing	missing	Missing	NON PARTICIPANT
MVIE08064942	FEMININ	.	.	0	0	82	.	Missing	Missing	Missing	Missing	Missing	missing	Missing	NON PARTICIPANT
MVIE08065043	FEMININ	.	.	0	0	88	.	Missing	Missing	Missing	Missing	Missing	missing	Missing	NON PARTICIPANT
MVIE08065144	FEMININ	.	.	0	0	67	.	Missing	Missing	Missing	Missing	Missing	missing	Missing	NON PARTICIPANT
MVIE08065245	FEMININ	.	.	0	0	69	.	Missing	Missing	Missing	Missing	Missing	missing	Missing	NON PARTICIPANT
MVIE08065346	FEMININ	.	.	0	0	87	.	Missing	Missing	Missing	Missing	Missing	missing	Missing	NON PARTICIPANT
MVIE08065447	FEMININ	.	.	0	0	68	.	Missing	Missing	Missing	Missing	Missing	missing	Missing	NON PARTICIPANT
MVIE08065548	FEMININ	12	6	0	0	76	0	Yes	No	No	Good	Better	Primary school	Couple	FULL PARTICIPANT
MVIE08065649	FEMININ	.	.	0	0	69	.	Missing	Missing	Missing	Missing	Missing	missing	Missing	NON PARTICIPANT
MVIE08065750	FEMININ	.	.	0	0	73	1	No	No	No	Do not know	Do not know	Primary school	Couple	PARTIAL PARTICIPANT
MVIE08065851	FEMININ	.	.	0	0	70	.	Missing	Missing	Missing	Missing	Missing	missing	Missing	NON PARTICIPANT
MVIE08065952	FEMININ	5	2	0	0	78	1	No	No	No	Good	As good as	Secondary 1st cycle	Single	FULL PARTICIPANT
MVIE08066053	FEMININ	.	.	0	0	68	0	No	No	No	Very good	As good as	Secondary 1st cycle	Family cohabitation	PARTIAL PARTICIPANT
MVIE08066154	FEMININ	.	.	0	0	83	.	Missing	Missing	Missing	Missing	Missing	missing	Missing	NON PARTICIPANT
MVIE08066255	FEMININ	.	.	0	0	77	2	No	No	No	Missing	Missing	Primary school	Couple	FULL PARTICIPANT
MVIE08066356	FEMININ	.	.	0	0	77	.	Missing	Missing	Missing	Missing	Missing	missing	Missing	NON PARTICIPANT
MVIE08066457	FEMININ	.	.	0	0	82	.	Missing	Missing	Missing	Missing	Missing	missing	Missing	NON PARTICIPANT
MVIE08066558	FEMININ	.	.	0	0	76	.	Missing	Missing	Missing	Missing	Missing	missing	Missing	NON PARTICIPANT
MVIE08066659	FEMININ	.	.	0	0	71	0	No	No	No	Good	As good as	Secondary 1st cycle	Single	PARTIAL PARTICIPANT
MVIE08066760	FEMININ	.	.	0	1	87	.	Missing	Missing	Missing	Missing	Missing	missing	Missing	NON PARTICIPANT
MVIE08066861	FEMININ	.	.	0	0	85	.	Missing	Missing	Missing	Missing	Missing	missing	Missing	NON PARTICIPANT
MVIE08066962	FEMININ	.	.	1	0	85	.	Missing	Missing	Missing	Missing	Missing	missing	Missing	NON PARTICIPANT
MVIE08067063	FEMININ	.	.	0	0	74	.	Missing	Missing	Missing	Missing	Missing	missing	Missing	NON PARTICIPANT
MVIE08067164	FEMININ	.	.	0	0	76	0	No	No	No	Very good	Better	Primary school	Couple	FULL PARTICIPANT
MVIE08067265	FEMININ	.	.	0	0	71	.	Missing	Missing	Missing	Missing	Missing	missing	Missing	NON PARTICIPANT
MVIE08067366	FEMININ	4	3	0	0	74	3	Yes	No	No	Good	As good as	Secondary 1st cycle	Couple	FULL PARTICIPANT
MVIE08067467	FEMININ	.	.	0	1	78	.	Missing	Missing	Missing	Missing	Missing	missing	Missing	NON PARTICIPANT
MVIE08067568	FEMININ	.	.	0	0	91	.	Missing	Missing	Missing	Missing	Missing	missing	Missing	NON PARTICIPANT
MVIE08067669	FEMININ	2	1	0	0	68	1	No	No	No	Good	Better	Secondary 1st cycle	Couple	FULL PARTICIPANT
MVIE08067770	FEMININ	.	2	0	0	69	0	Yes	No	No	Missing	Missing	Secondary 2nd cycle	Couple	FULL PARTICIPANT
MVIE08067871	FEMININ	0	3	0	0	77	1	No	No	No	Good	As good as	Secondary 1st cycle	Single	FULL PARTICIPANT
MVIE08067972	FEMININ	.	.	0	0	83	.	Missing	Missing	Missing	Missing	Missing	missing	Missing	NON PARTICIPANT
MVIE08068073	FEMININ	.	.	0	0	82	.	Missing	Missing	Missing	Missing	Missing	missing	Missing	NON PARTICIPANT
MVIE08068174	FEMININ	7	7	0	0	76	0	Yes	No	No	Very bad	Worse	Secondary 1st cycle	Single	FULL PARTICIPANT
MVIE08068275	FEMININ	.	.	0	0	82	.	Missing	Missing	Missing	Missing	Missing	missing	Missing	NON PARTICIPANT
MVIE08068376	FEMININ	18	5	0	0	66	1	No	No	No	Good	Better	Secondary 2nd cycle	Single	FULL PARTICIPANT
MVIE08068477	FEMININ	.	.	0	0	72	0	No	No	No	Good	Better	Secondary 2nd cycle	Family cohabitation	PARTIAL PARTICIPANT
MVIE08068578	FEMININ	.	.	0	0	74	.	Missing	Missing	Missing	Missing	Missing	missing	Missing	NON PARTICIPANT
MVIE08068679	FEMININ	6	3	0	0	72	3	No	No	No	Good	As good as	Secondary 1st cycle	Couple	FULL PARTICIPANT
MVIE08068780	FEMININ	3	7	0	0	69	5	No	Yes	No	Bad	As good as	Primary school	Couple	FULL PARTICIPANT
MVIE08068881	FEMININ	.	.	0	1	86	.	Missing	Missing	Missing	Missing	Missing	missing	Missing	NON PARTICIPANT
MVIE08068982	FEMININ	.	.	0	0	90	.	Missing	Missing	Missing	Missing	Missing	missing	Missing	NON PARTICIPANT
MVIE08069083	FEMININ	.	.	0	0	66	.	Missing	Missing	Missing	Missing	Missing	missing	Missing	NON PARTICIPANT
MVIE08069184	FEMININ	.	.	0	0	77	.	Missing	Missing	Missing	Missing	Missing	missing	Missing	NON PARTICIPANT
MVIE08069285	FEMININ	4	2	0	0	71	0	No	Yes	No	Good	As good as	Primary school	Family cohabitation	FULL PARTICIPANT
MVIE08069386	FEMININ	.	.	0	0	80	.	Missing	Missing	Missing	Missing	Missing	missing	Missing	NON PARTICIPANT
MVIE08069487	FEMININ	0	1	0	0	77	0	No	No	No	Very good	Better	Secondary 1st cycle	Single	FULL PARTICIPANT
MVIE08069588	FEMININ	.	.	0	1	80	.	Missing	Missing	Missing	Missing	Missing	missing	Missing	NON PARTICIPANT
MVIE08069689	FEMININ	.	.	0	0	82	.	Missing	Missing	Missing	Missing	Missing	missing	Missing	NON PARTICIPANT
MVIE08069790	FEMININ	.	.	1	0	104	.	Missing	Missing	Missing	Missing	Missing	missing	Missing	NON PARTICIPANT
MVIE08069891	FEMININ	.	.	0	0	84	.	Missing	Missing	Missing	Missing	Missing	missing	Missing	NON PARTICIPANT
MVIE08069992	FEMININ	.	.	0	0	66	.	Missing	Missing	Missing	Missing	Missing	missing	Missing	NON PARTICIPANT
MVIE08070093	FEMININ	.	.	0	0	70	.	Missing	Missing	Missing	Missing	Missing	missing	Missing	NON PARTICIPANT
MVIE08070194	FEMININ	.	.	0	0	81	.	Missing	Missing	Missing	Missing	Missing	missing	Missing	NON PARTICIPANT
MVIE08070295	FEMININ	2	2	0	0	67	1	No	No	No	Intermediate	Better	Secondary 1st cycle	Couple	FULL PARTICIPANT
MVIE08070396	FEMININ	.	.	0	0	67	.	Missing	Missing	Missing	Missing	Missing	missing	Missing	NON PARTICIPANT
MVIE08070400	FEMININ	1	2	0	0	68	0	No	No	No	Intermediate	Worse	Higher education (short)	Single	FULL PARTICIPANT
MVIE08070501	FEMININ	.	.	0	0	67	0	No	No	No	Very bad	As good as	Primary school	Couple	PARTIAL PARTICIPANT
MVIE08070602	FEMININ	.	.	0	0	80	.	Missing	Missing	Missing	Missing	Missing	missing	Missing	NON PARTICIPANT
MVIE08070703	FEMININ	.	.	0	0	70	.	Missing	Missing	Missing	Missing	Missing	missing	Missing	NON PARTICIPANT
MVIE08070804	FEMININ	.	.	0	0	75	2	No	No	No	Good	Do not know	Secondary 1st cycle	Single	PARTIAL PARTICIPANT
MVIE08070905	FEMININ	9	0	0	0	66	1	No	No	No	Good	Better	Higher education (short)	Single	FULL PARTICIPANT
MVIE08071006	FEMININ	.	.	0	0	66	.	Missing	Missing	Missing	Missing	Missing	missing	Missing	NON PARTICIPANT
MVIE08071107	FEMININ	.	.	0	0	82	.	Missing	Missing	Missing	Missing	Missing	missing	Missing	NON PARTICIPANT
MVIE08071208	FEMININ	.	.	0	0	76	.	Missing	Missing	Missing	Missing	Missing	missing	Missing	NON PARTICIPANT
MVIE08071309	FEMININ	.	.	0	0	69	.	Missing	Missing	Missing	Missing	Missing	missing	Missing	NON PARTICIPANT
MVIE08071410	FEMININ	3	2	0	1	71	7	No	No	No	Intermediate	Better	Higher education (short)	Single	FULL PARTICIPANT
MVIE08071511	FEMININ	.	.	0	0	94	.	Missing	Missing	Missing	Missing	Missing	missing	Missing	NON PARTICIPANT
MVIE08071612	FEMININ	8	4	0	0	75	1	No	No	No	Intermediate	Better	Primary school	Couple	FULL PARTICIPANT
MVIE08071713	FEMININ	2	3	0	0	79	2	No	No	No	Intermediate	Worse	Higher education (short)	Single	FULL PARTICIPANT
MVIE08071814	FEMININ	.	.	0	0	68	.	Missing	Missing	Missing	Missing	Missing	missing	Missing	NON PARTICIPANT
MVIE08071915	FEMININ	.	.	0	0	90	.	Missing	Missing	Missing	Missing	Missing	missing	Missing	NON PARTICIPANT
MVIE08072016	MASCULIN	.	.	0	0	69	.	Missing	Missing	Missing	Missing	Missing	missing	Missing	NON PARTICIPANT
MVIE08072117	MASCULIN	.	.	1	0	67	.	Missing	Missing	Missing	Missing	Missing	missing	Missing	NON PARTICIPANT
MVIE08072218	MASCULIN	.	.	0	0	78	.	Missing	Missing	Missing	Missing	Missing	missing	Missing	NON PARTICIPANT
MVIE08072319	MASCULIN	.	.	0	0	83	.	Missing	Missing	Missing	Missing	Missing	missing	Missing	NON PARTICIPANT
MVIE08072420	MASCULIN	.	.	0	0	77	.	Missing	Missing	Missing	Missing	Missing	missing	Missing	NON PARTICIPANT
MVIE08072521	MASCULIN	.	.	0	0	69	.	Missing	Missing	Missing	Missing	Missing	missing	Missing	NON PARTICIPANT
MVIE08072622	MASCULIN	2	1	0	0	71	2	No	No	No	Good	Better	Secondary 1st cycle	Couple	FULL PARTICIPANT
MVIE08072723	MASCULIN	.	.	0	0	79	0	No	No	No	Intermediate	Do not know	Primary school	Couple	PARTIAL PARTICIPANT
MVIE08072824	MASCULIN	.	.	0	0	75	7	No	No	No	Bad	Worse	Secondary 1st cycle	Couple	PARTIAL PARTICIPANT
MVIE08072925	MASCULIN	.	.	0	0	82	.	Missing	Missing	Missing	Missing	Missing	missing	Missing	NON PARTICIPANT
MVIE08073026	MASCULIN	.	.	0	0	68	.	Missing	Missing	Missing	Missing	Missing	missing	Missing	NON PARTICIPANT
MVIE08073127	MASCULIN	.	.	0	0	81	8	Yes	No	No	Good	Better	Primary school	Couple	PARTIAL PARTICIPANT
MVIE08073228	MASCULIN	.	.	0	0	80	.	Missing	Missing	Missing	Missing	Missing	missing	Missing	NON PARTICIPANT
MVIE08073329	MASCULIN	.	.	0	1	84	.	Missing	Missing	Missing	Missing	Missing	missing	Missing	NON PARTICIPANT
MVIE08073430	MASCULIN	.	.	0	0	84	.	Missing	Missing	Missing	Missing	Missing	missing	Missing	NON PARTICIPANT
MVIE08073531	MASCULIN	.	.	0	0	70	.	Missing	Missing	Missing	Missing	Missing	missing	Missing	NON PARTICIPANT
MVIE08073632	MASCULIN	.	.	0	0	71	1	No	Yes	No	Intermediate	As good as	Secondary 2nd cycle	Couple	PARTIAL PARTICIPANT
MVIE08073733	MASCULIN	.	.	0	0	66	.	Missing	Missing	Missing	Missing	Missing	missing	Missing	NON PARTICIPANT
MVIE08073834	MASCULIN	.	.	0	0	81	.	Missing	Missing	Missing	Missing	Missing	missing	Missing	NON PARTICIPANT
MVIE08073935	MASCULIN	5	1	0	0	70	4	No	No	No	Good	As good as	Higher education (short)	Couple	FULL PARTICIPANT
MVIE08074036	MASCULIN	.	.	1	0	77	.	Missing	Missing	Missing	Missing	Missing	missing	Missing	NON PARTICIPANT
MVIE08074137	MASCULIN	.	.	0	0	77	.	Missing	Missing	Missing	Missing	Missing	missing	Missing	NON PARTICIPANT
MVIE08074238	MASCULIN	19	2	0	0	86	3	No	No	No	Intermediate	Better	Secondary 1st cycle	Couple	FULL PARTICIPANT
MVIE08074339	MASCULIN	.	.	0	0	75	.	Missing	Missing	Missing	Missing	Missing	missing	Missing	NON PARTICIPANT
MVIE08074440	MASCULIN	.	.	0	0	78	.	Missing	Missing	Missing	Missing	Missing	missing	Missing	NON PARTICIPANT
MVIE08074541	MASCULIN	4	0	0	0	68	0	No	Yes	No	Good	As good as	Primary school	Couple	FULL PARTICIPANT
MVIE08074642	MASCULIN	.	.	0	0	76	.	Missing	Missing	Missing	Missing	Missing	missing	Missing	NON PARTICIPANT
MVIE08074743	MASCULIN	3	1	0	0	83	0	No	No	No	Good	Better	Higher education (short)	Single	FULL PARTICIPANT
MVIE08074844	MASCULIN	.	.	0	0	75	.	Missing	Missing	Missing	Missing	Missing	missing	Missing	NON PARTICIPANT
MVIE08074945	MASCULIN	.	.	0	0	66	.	Missing	Missing	Missing	Missing	Missing	missing	Missing	NON PARTICIPANT
MVIE08075046	MASCULIN	.	.	0	0	74	.	Missing	Missing	Missing	Missing	Missing	missing	Missing	NON PARTICIPANT
MVIE08075147	MASCULIN	.	.	0	0	80	.	Missing	Missing	Missing	Missing	Missing	missing	Missing	NON PARTICIPANT
MVIE08075248	MASCULIN	0	0	0	0	73	0	No	No	No	Very good	Better	Secondary 1st cycle	Couple	FULL PARTICIPANT
MVIE08075349	MASCULIN	.	.	0	0	73	.	Missing	Missing	Missing	Missing	Missing	missing	Missing	NON PARTICIPANT
MVIE08075450	MASCULIN	.	.	0	0	73	.	Missing	Missing	Missing	Missing	Missing	missing	Missing	NON PARTICIPANT
MVIE08075551	MASCULIN	.	.	0	0	70	.	Missing	Missing	Missing	Missing	Missing	missing	Missing	NON PARTICIPANT
MVIE08075652	MASCULIN	.	.	0	0	68	.	Missing	Missing	Missing	Missing	Missing	missing	Missing	NON PARTICIPANT
MVIE08075753	MASCULIN	3	8	0	0	75	3	Yes	No	No	Intermediate	Worse	Primary school	Couple	FULL PARTICIPANT
MVIE08075854	MASCULIN	.	.	0	0	73	.	Missing	Missing	Missing	Missing	Missing	missing	Missing	NON PARTICIPANT
MVIE08075955	MASCULIN	.	.	0	0	75	.	Missing	Missing	Missing	Missing	Missing	missing	Missing	NON PARTICIPANT
MVIE08076056	MASCULIN	.	.	0	0	66	3	No	No	No	Good	As good as	Higher education (short)	Couple	PARTIAL PARTICIPANT
MVIE08076157	MASCULIN	.	.	0	0	72	.	Missing	Missing	Missing	Missing	Missing	missing	Missing	NON PARTICIPANT
MVIE08076258	MASCULIN	7	1	0	0	71	0	No	No	No	Very good	Better	Higher education - University	Couple	FULL PARTICIPANT
MVIE08076359	MASCULIN	.	.	0	0	91	.	Missing	Missing	Missing	Missing	Missing	missing	Missing	NON PARTICIPANT
MVIE08076460	MASCULIN	.	.	0	0	77	.	Missing	Missing	Missing	Missing	Missing	missing	Missing	NON PARTICIPANT
MVIE08076561	MASCULIN	.	.	0	0	76	.	Missing	Missing	Missing	Missing	Missing	missing	Missing	NON PARTICIPANT
MVIE08076662	MASCULIN	.	.	0	0	67	2	Missing	Missing	Missing	Good	Better	Primary school	Missing	PARTIAL PARTICIPANT
MVIE08076763	MASCULIN	.	.	0	0	69	.	Missing	Missing	Missing	Missing	Missing	missing	Missing	NON PARTICIPANT
MVIE08076864	MASCULIN	.	.	0	0	70	.	Missing	Missing	Missing	Missing	Missing	missing	Missing	NON PARTICIPANT
MVIE08076965	MASCULIN	.	.	0	0	78	.	Missing	Missing	Missing	Missing	Missing	missing	Missing	NON PARTICIPANT
MVIE08077066	MASCULIN	.	.	0	1	71	.	No	No	No	Good	Do not know	Primary school	Couple	FULL PARTICIPANT
MVIE08077167	MASCULIN	.	2	0	0	76	2	No	No	No	Bad	Worse	Primary school	Family cohabitation	FULL PARTICIPANT
MVIE08077268	MASCULIN	.	.	0	1	79	.	Missing	Missing	Missing	Missing	Missing	missing	Missing	NON PARTICIPANT
MVIE08077369	MASCULIN	.	.	0	0	68	.	Missing	Missing	Missing	Missing	Missing	missing	Missing	NON PARTICIPANT
MVIE08077470	MASCULIN	.	.	0	0	72	.	Missing	Missing	Missing	Missing	Missing	missing	Missing	NON PARTICIPANT
MVIE08077571	MASCULIN	9	3	0	0	77	3	No	No	No	Good	Better	Secondary 1st cycle	Couple	FULL PARTICIPANT
MVIE08077672	MASCULIN	.	.	0	0	72	.	Missing	Missing	Missing	Missing	Missing	missing	Missing	NON PARTICIPANT
MVIE08077773	MASCULIN	.	.	0	0	70	.	Missing	Missing	Missing	Missing	Missing	missing	Missing	NON PARTICIPANT
MVIE08077874	MASCULIN	.	.	0	0	66	.	Missing	Missing	Missing	Missing	Missing	missing	Missing	NON PARTICIPANT
MVIE08077975	MASCULIN	.	.	0	0	68	.	Missing	Missing	Missing	Missing	Missing	missing	Missing	NON PARTICIPANT
MVIE08078076	MASCULIN	.	.	0	0	68	.	Missing	Missing	Missing	Missing	Missing	missing	Missing	NON PARTICIPANT
MVIE08078177	MASCULIN	.	.	0	0	69	.	Missing	Missing	Missing	Missing	Missing	missing	Missing	NON PARTICIPANT
MVIE08078278	MASCULIN	.	.	1	0	87	.	Missing	Missing	Missing	Missing	Missing	missing	Missing	NON PARTICIPANT
MVIE08078379	MASCULIN	.	.	0	0	74	.	Missing	Missing	Missing	Missing	Missing	missing	Missing	NON PARTICIPANT
MVIE08078480	MASCULIN	17	6	0	0	74	1	No	No	No	Good	Better	Secondary 2nd cycle	Couple	FULL PARTICIPANT
MVIE08078581	MASCULIN	.	.	0	0	89	.	Missing	Missing	Missing	Missing	Missing	missing	Missing	NON PARTICIPANT
MVIE08078682	MASCULIN	0	2	0	0	82	0	No	No	No	Intermediate	Better	Secondary 1st cycle	Single	FULL PARTICIPANT
MVIE08078783	MASCULIN	.	.	0	0	77	.	Missing	Missing	Missing	Missing	Missing	missing	Missing	NON PARTICIPANT
MVIE08078884	MASCULIN	.	.	0	0	68	.	Missing	Missing	Missing	Missing	Missing	missing	Missing	NON PARTICIPANT
MVIE08078985	MASCULIN	.	.	0	0	66	.	Missing	Missing	Missing	Missing	Missing	missing	Missing	NON PARTICIPANT
MVIE08079086	MASCULIN	.	2	1	0	91	0	No	No	No	Missing	Missing	Secondary 1st cycle	Single	FULL PARTICIPANT
MVIE08079187	MASCULIN	.	.	0	0	82	.	Missing	Missing	Missing	Missing	Missing	missing	Missing	NON PARTICIPANT
MVIE08079288	MASCULIN	5	3	0	0	71	1	No	No	No	Intermediate	As good as	Secondary 1st cycle	Couple	FULL PARTICIPANT
MVIE08079389	MASCULIN	.	.	0	0	68	.	Missing	Missing	Missing	Missing	Missing	missing	Missing	NON PARTICIPANT
MVIE08079490	MASCULIN	.	.	0	0	69	.	Missing	Missing	Missing	Missing	Missing	missing	Missing	NON PARTICIPANT
MVIE08079591	MASCULIN	.	.	0	0	74	2	No	Yes	No	Very good	Better	Primary school	Family cohabitation	PARTIAL PARTICIPANT
MVIE08079692	MASCULIN	.	.	0	0	72	.	Missing	Missing	Missing	Missing	Missing	missing	Missing	NON PARTICIPANT
MVIE08079793	MASCULIN	.	.	0	0	72	.	Missing	Missing	Missing	Missing	Missing	missing	Missing	NON PARTICIPANT
MVIE08079894	MASCULIN	.	.	0	0	68	.	Missing	Missing	Missing	Missing	Missing	missing	Missing	NON PARTICIPANT
MVIE08079995	MASCULIN	2	1	0	0	67	1	No	No	No	Very good	As good as	Higher education (short)	Couple	FULL PARTICIPANT
MVIE08080096	MASCULIN	0	2	0	0	69	2	No	No	No	Good	As good as	Primary school	Couple	FULL PARTICIPANT
MVIE08080100	FEMININ	.	.	0	0	71	.	Missing	Missing	Missing	Missing	Missing	missing	Missing	NON PARTICIPANT
MVIE08080201	FEMININ	4	11	0	0	67	2	No	No	No	Intermediate	As good as	Secondary 2nd cycle	Single	FULL PARTICIPANT
MVIE08080302	FEMININ	.	.	0	0	67	.	Missing	Missing	Missing	Missing	Missing	missing	Missing	NON PARTICIPANT
MVIE08080403	FEMININ	.	.	0	0	75	0	No	No	No	Very good	Better	Secondary 1st cycle	Family cohabitation	PARTIAL PARTICIPANT
MVIE08080504	FEMININ	.	.	0	0	73	0	No	No	No	Good	As good as	Secondary 1st cycle	Couple	PARTIAL PARTICIPANT
MVIE08080605	FEMININ	.	.	0	0	76	0	No	No	No	Good	As good as	Primary school	Couple	PARTIAL PARTICIPANT
MVIE08080706	FEMININ	.	.	0	0	74	2	No	No	No	Bad	Do not know	Secondary 2nd cycle	Single	PARTIAL PARTICIPANT
MVIE08080807	FEMININ	.	.	0	0	69	.	Missing	Missing	Missing	Missing	Missing	missing	Missing	NON PARTICIPANT
MVIE08080908	FEMININ	.	.	0	0	69	.	Missing	Missing	Missing	Missing	Missing	missing	Missing	NON PARTICIPANT
MVIE08081009	FEMININ	.	.	0	0	69	.	Missing	Missing	Missing	Missing	Missing	missing	Missing	NON PARTICIPANT
MVIE08081110	FEMININ	.	.	0	0	81	.	Missing	Missing	Missing	Missing	Missing	missing	Missing	NON PARTICIPANT
MVIE08081211	FEMININ	.	.	0	0	69	.	Missing	Missing	Missing	Missing	Missing	missing	Missing	NON PARTICIPANT
MVIE08081312	FEMININ	.	.	0	0	74	.	Missing	Missing	Missing	Missing	Missing	missing	Missing	NON PARTICIPANT
MVIE08081413	FEMININ	.	.	0	0	72	2	No	No	No	Intermediate	Better	No schooling	Single	PARTIAL PARTICIPANT
MVIE08081514	FEMININ	.	.	0	0	67	.	Missing	Missing	Missing	Missing	Missing	missing	Missing	NON PARTICIPANT
MVIE08081615	FEMININ	3	1	0	0	69	2	No	No	No	Good	As good as	Higher education (short)	Couple	FULL PARTICIPANT
MVIE08081716	FEMININ	.	.	0	0	68	.	Missing	Missing	Missing	Missing	Missing	missing	Missing	NON PARTICIPANT
MVIE08081817	FEMININ	.	.	0	0	77	.	Missing	Missing	Missing	Missing	Missing	missing	Missing	NON PARTICIPANT
MVIE08081918	FEMININ	.	.	0	0	84	.	Missing	Missing	Missing	Missing	Missing	missing	Missing	NON PARTICIPANT
MVIE08082019	FEMININ	.	.	1	0	72	.	Missing	Missing	Missing	Missing	Missing	missing	Missing	NON PARTICIPANT
MVIE08082120	FEMININ	.	.	0	0	76	3	No	Do not know	No	Good	Better	Primary school	Couple	PARTIAL PARTICIPANT
MVIE08082221	FEMININ	.	.	0	0	67	.	Missing	Missing	Missing	Missing	Missing	missing	Missing	NON PARTICIPANT
MVIE08082322	FEMININ	.	.	1	0	69	.	Missing	Missing	Missing	Missing	Missing	missing	Missing	NON PARTICIPANT
MVIE08082423	FEMININ	.	.	0	0	88	.	Missing	Missing	Missing	Missing	Missing	missing	Missing	NON PARTICIPANT
MVIE08082524	FEMININ	.	.	0	0	66	.	Missing	Missing	Missing	Missing	Missing	missing	Missing	NON PARTICIPANT
MVIE08082625	FEMININ	1	3	0	0	77	1	No	No	No	Good	As good as	Secondary 2nd cycle	Couple	FULL PARTICIPANT
MVIE08082726	FEMININ	9	1	0	0	71	1	No	No	No	Good	Better	Secondary 2nd cycle	Couple	FULL PARTICIPANT
MVIE08082827	FEMININ	.	.	0	0	73	2	No	No	No	Intermediate	As good as	Primary school	Single	PARTIAL PARTICIPANT
MVIE08082928	FEMININ	.	.	0	0	88	.	Missing	Missing	Missing	Missing	Missing	missing	Missing	NON PARTICIPANT
MVIE08083029	FEMININ	.	.	0	0	80	.	Missing	Missing	Missing	Missing	Missing	missing	Missing	NON PARTICIPANT
MVIE08083130	FEMININ	.	.	0	0	80	.	Missing	Missing	Missing	Missing	Missing	missing	Missing	NON PARTICIPANT
MVIE08083231	FEMININ	.	.	0	1	88	.	Missing	Missing	Missing	Missing	Missing	missing	Missing	NON PARTICIPANT
MVIE08083332	FEMININ	.	.	0	0	78	.	Missing	Missing	Missing	Missing	Missing	missing	Missing	NON PARTICIPANT
MVIE08083433	FEMININ	.	.	0	1	78	.	Missing	Missing	Missing	Missing	Missing	missing	Missing	PARTIAL PARTICIPANT
MVIE08083534	FEMININ	.	.	0	0	93	.	Missing	Missing	Missing	Missing	Missing	missing	Missing	NON PARTICIPANT
MVIE08083635	FEMININ	1	3	0	0	70	5	No	No	No	Good	Better	Secondary 2nd cycle	Single	FULL PARTICIPANT
MVIE08083736	FEMININ	.	.	0	0	86	.	Missing	Missing	Missing	Missing	Missing	missing	Missing	NON PARTICIPANT
MVIE08083837	FEMININ	.	.	0	0	69	.	Missing	Missing	Missing	Missing	Missing	missing	Missing	NON PARTICIPANT
MVIE08083938	FEMININ	5	3	0	0	85	1	No	No	No	Good	Better	Secondary 2nd cycle	Non-family cohabitation	FULL PARTICIPANT
MVIE08084039	FEMININ	.	.	0	0	89	.	Missing	Missing	Missing	Missing	Missing	missing	Missing	NON PARTICIPANT
MVIE08084140	FEMININ	.	.	0	0	92	.	Missing	Missing	Missing	Missing	Missing	missing	Missing	NON PARTICIPANT
MVIE08084241	FEMININ	.	.	0	1	80	.	Missing	Missing	Missing	Missing	Missing	missing	Missing	NON PARTICIPANT
MVIE08084342	FEMININ	.	.	0	0	89	.	Missing	Missing	Missing	Missing	Missing	missing	Missing	NON PARTICIPANT
MVIE08084443	FEMININ	.	.	0	0	90	.	Missing	Missing	Missing	Missing	Missing	missing	Missing	NON PARTICIPANT
MVIE08084544	FEMININ	.	.	0	0	75	2	No	No	No	Very good	Missing	Secondary 2nd cycle	Single	PARTIAL PARTICIPANT
MVIE08084645	FEMININ	3	1	0	0	71	0	No	No	No	Good	Better	Secondary 2nd cycle	Single	FULL PARTICIPANT
MVIE08084746	FEMININ	.	.	0	0	70	.	Missing	Missing	Missing	Missing	Missing	missing	Missing	NON PARTICIPANT
MVIE08084847	FEMININ	.	.	0	0	66	.	Missing	Missing	Missing	Missing	Missing	missing	Missing	NON PARTICIPANT
MVIE08084948	FEMININ	.	.	0	0	75	.	Missing	Missing	Missing	Missing	Missing	missing	Missing	NON PARTICIPANT
MVIE08085049	FEMININ	.	.	0	0	81	.	Missing	Missing	Missing	Missing	Missing	missing	Missing	NON PARTICIPANT
MVIE08085150	FEMININ	5	1	0	0	68	0	No	No	No	Good	Better	Primary school	Single	FULL PARTICIPANT
MVIE08085251	FEMININ	0	1	0	0	68	0	Yes	No	No	Good	As good as	Secondary 2nd cycle	Couple	FULL PARTICIPANT
MVIE08085352	FEMININ	.	.	0	0	79	.	Missing	Missing	Missing	Missing	Missing	missing	Missing	NON PARTICIPANT
MVIE08085453	FEMININ	.	.	0	0	69	.	No	No	No	Missing	Missing	Primary school	Couple	FULL PARTICIPANT
MVIE08085554	FEMININ	12	1	0	0	76	3	No	No	No	Good	Worse	Secondary 2nd cycle	Single	FULL PARTICIPANT
MVIE08085655	FEMININ	3	4	0	0	74	0	No	No	No	Good	As good as	Secondary 1st cycle	Single	FULL PARTICIPANT
MVIE08085756	FEMININ	.	.	0	0	73	.	Missing	Missing	Missing	Missing	Missing	missing	Missing	NON PARTICIPANT
MVIE08085857	FEMININ	.	.	0	0	66	.	Missing	Missing	Missing	Missing	Missing	missing	Missing	NON PARTICIPANT
MVIE08085958	FEMININ	.	.	0	0	77	.	Missing	Missing	Missing	Missing	Missing	missing	Missing	NON PARTICIPANT
MVIE08086059	FEMININ	.	.	0	0	77	.	Missing	Missing	Missing	Missing	Missing	missing	Missing	NON PARTICIPANT
MVIE08086160	FEMININ	.	.	0	1	83	.	Missing	Missing	Missing	Missing	Missing	missing	Missing	PARTIAL PARTICIPANT
MVIE08086261	FEMININ	1	1	0	0	71	2	No	No	No	Good	Better	Secondary 1st cycle	Couple	FULL PARTICIPANT
MVIE08086362	FEMININ	.	.	0	0	68	.	Missing	Missing	Missing	Missing	Missing	missing	Missing	NON PARTICIPANT
MVIE08086463	FEMININ	13	8	1	0	66	4	No	No	No	Very bad	Worse	Secondary 1st cycle	Couple	FULL PARTICIPANT
MVIE08086564	FEMININ	.	.	0	0	80	.	Missing	Missing	Missing	Missing	Missing	missing	Missing	NON PARTICIPANT
MVIE08086665	FEMININ	.	.	0	0	79	.	Missing	Missing	Missing	Missing	Missing	missing	Missing	NON PARTICIPANT
MVIE08086766	FEMININ	.	.	0	0	88	.	Missing	Missing	Missing	Missing	Missing	missing	Missing	NON PARTICIPANT
MVIE08086867	FEMININ	.	.	0	0	71	.	Missing	Missing	Missing	Missing	Missing	missing	Missing	NON PARTICIPANT
MVIE08086968	FEMININ	.	.	0	0	71	.	Missing	Missing	Missing	Missing	Missing	missing	Missing	NON PARTICIPANT
MVIE08087069	FEMININ	.	.	0	0	77	.	Missing	Missing	Missing	Missing	Missing	missing	Missing	NON PARTICIPANT
MVIE08087170	FEMININ	.	.	0	0	82	.	Missing	Missing	Missing	Missing	Missing	missing	Missing	NON PARTICIPANT
MVIE08087271	FEMININ	2	3	0	0	67	1	No	No	No	Bad	Better	Secondary 1st cycle	Couple	FULL PARTICIPANT
MVIE08087372	FEMININ	8	3	1	0	74	1	Yes	No	No	Intermediate	Better	Primary school	Couple	FULL PARTICIPANT
MVIE08087473	FEMININ	.	.	0	0	72	.	Missing	Missing	Missing	Missing	Missing	missing	Missing	NON PARTICIPANT
MVIE08087574	FEMININ	.	.	1	0	97	.	Missing	Missing	Missing	Missing	Missing	missing	Missing	NON PARTICIPANT
MVIE08087675	FEMININ	.	.	0	0	76	.	Missing	Missing	Missing	Missing	Missing	missing	Missing	NON PARTICIPANT
MVIE08087776	FEMININ	.	.	0	0	84	.	Missing	Missing	Missing	Missing	Missing	missing	Missing	NON PARTICIPANT
MVIE08087877	FEMININ	.	.	0	0	85	0	No	No	No	Bad	Better	Primary school	Family cohabitation	PARTIAL PARTICIPANT
MVIE08087978	FEMININ	.	.	0	0	74	4	No	No	No	Intermediate	Better	Secondary 1st cycle	Couple	PARTIAL PARTICIPANT
MVIE08088079	FEMININ	.	.	0	0	68	.	Missing	Missing	Missing	Missing	Missing	missing	Missing	NON PARTICIPANT
MVIE08088180	FEMININ	.	.	0	0	67	.	Missing	Missing	Missing	Missing	Missing	missing	Missing	NON PARTICIPANT
MVIE08088281	FEMININ	.	.	1	0	67	.	Missing	Missing	Missing	Missing	Missing	missing	Missing	NON PARTICIPANT
MVIE08088382	FEMININ	.	.	0	0	72	0	No	No	No	Intermediate	Better	Secondary 2nd cycle	Non-family cohabitation	PARTIAL PARTICIPANT
MVIE08088483	FEMININ	.	.	0	0	82	.	Missing	Missing	Missing	Missing	Missing	missing	Missing	NON PARTICIPANT
MVIE08088584	FEMININ	.	.	0	1	72	.	Missing	Missing	Missing	Missing	Missing	missing	Missing	NON PARTICIPANT
MVIE08088685	FEMININ	.	.	0	0	78	.	Missing	Missing	Missing	Missing	Missing	missing	Missing	NON PARTICIPANT
MVIE08088786	FEMININ	.	.	1	0	95	.	Missing	Missing	Missing	Missing	Missing	missing	Missing	NON PARTICIPANT
MVIE08088887	FEMININ	.	.	0	0	90	.	Missing	Missing	Missing	Missing	Missing	missing	Missing	NON PARTICIPANT
MVIE08088988	FEMININ	.	.	0	0	78	.	Missing	Missing	Missing	Missing	Missing	missing	Missing	NON PARTICIPANT
MVIE08089089	FEMININ	23	13	0	0	79	4	No	Yes	Yes	Intermediate	Better	Primary school	Single	FULL PARTICIPANT
MVIE08089190	FEMININ	12	1	0	0	73	4	No	No	No	Good	As good as	Secondary 1st cycle	Single	FULL PARTICIPANT
MVIE08089291	FEMININ	.	.	0	0	82	.	Missing	Missing	Missing	Missing	Missing	missing	Missing	NON PARTICIPANT
MVIE08089392	FEMININ	.	.	0	0	77	.	Missing	Missing	Missing	Missing	Missing	missing	Missing	NON PARTICIPANT
MVIE08089493	FEMININ	.	.	0	0	72	.	Missing	Missing	Missing	Missing	Missing	missing	Missing	NON PARTICIPANT
MVIE08089594	FEMININ	5	6	0	0	72	2	No	No	No	Intermediate	As good as	Secondary 1st cycle	Couple	FULL PARTICIPANT
MVIE08089695	FEMININ	.	.	0	1	85	.	Missing	Missing	Missing	Missing	Missing	missing	Missing	PARTIAL PARTICIPANT
MVIE08089796	FEMININ	.	.	0	0	89	.	Missing	Missing	Missing	Missing	Missing	missing	Missing	NON PARTICIPANT
MVIE08089800	FEMININ	.	.	0	0	70	.	Missing	Missing	Missing	Missing	Missing	missing	Missing	NON PARTICIPANT
MVIE08089901	FEMININ	.	.	0	0	81	.	Missing	Missing	Missing	Missing	Missing	missing	Missing	NON PARTICIPANT
MVIE08090002	FEMININ	.	.	0	0	72	.	No	No	No	Missing	Missing	Secondary 2nd cycle	Couple	FULL PARTICIPANT
MVIE08090103	FEMININ	.	.	0	0	68	.	Missing	Missing	Missing	Missing	Missing	missing	Missing	NON PARTICIPANT
MVIE08090204	FEMININ	.	.	0	0	89	.	Missing	Missing	Missing	Missing	Missing	missing	Missing	NON PARTICIPANT
MVIE08090305	FEMININ	.	.	0	0	78	.	Missing	Missing	Missing	Missing	Missing	missing	Missing	NON PARTICIPANT
MVIE08090406	FEMININ	27	6	0	0	74	3	No	No	No	Bad	Do not know	Secondary 1st cycle	Single	FULL PARTICIPANT
MVIE08090507	FEMININ	.	.	0	0	91	.	Missing	Missing	Missing	Missing	Missing	missing	Missing	NON PARTICIPANT
MVIE08090608	FEMININ	.	.	0	0	79	.	Missing	Missing	Missing	Missing	Missing	missing	Missing	NON PARTICIPANT
MVIE08090709	FEMININ	.	.	0	0	74	.	Missing	Missing	Missing	Missing	Missing	missing	Missing	NON PARTICIPANT
MVIE08090810	FEMININ	1	1	0	0	69	3	No	No	No	Good	Better	Primary school	Family cohabitation	FULL PARTICIPANT
MVIE08090911	FEMININ	.	.	0	0	84	.	Missing	Missing	Missing	Missing	Missing	missing	Missing	NON PARTICIPANT
MVIE08091012	FEMININ	.	.	0	0	68	.	Missing	Missing	Missing	Missing	Missing	missing	Missing	NON PARTICIPANT
MVIE08091113	FEMININ	.	.	0	0	89	.	Missing	Missing	Missing	Missing	Missing	missing	Missing	NON PARTICIPANT
MVIE08091214	FEMININ	.	.	0	0	82	.	Missing	Missing	Missing	Missing	Missing	missing	Missing	NON PARTICIPANT
MVIE08091315	FEMININ	.	.	0	0	66	.	Missing	Missing	Missing	Missing	Missing	missing	Missing	NON PARTICIPANT
MVIE08091416	FEMININ	.	.	0	0	68	.	Missing	Missing	Missing	Missing	Missing	missing	Missing	NON PARTICIPANT
MVIE08091517	FEMININ	.	.	0	0	66	.	Missing	Missing	Missing	Missing	Missing	missing	Missing	NON PARTICIPANT
MVIE08091618	FEMININ	.	.	0	0	77	.	Missing	Missing	Missing	Missing	Missing	missing	Missing	NON PARTICIPANT
MVIE08091719	FEMININ	.	.	0	0	70	.	Missing	Missing	Missing	Missing	Missing	missing	Missing	NON PARTICIPANT
MVIE08091820	FEMININ	3	2	0	0	70	0	No	Yes	Yes	Good	Better	Secondary 1st cycle	Single	FULL PARTICIPANT
MVIE08091921	MASCULIN	.	.	0	0	72	.	Missing	Missing	Missing	Missing	Missing	missing	Missing	NON PARTICIPANT
MVIE08092022	MASCULIN	12	3	0	1	81	0	Yes	No	No	Intermediate	As good as	Primary school	Family cohabitation	FULL PARTICIPANT
MVIE08092123	MASCULIN	.	.	0	0	74	1	No	Yes	No	Good	Better	Primary school	Couple	PARTIAL PARTICIPANT
MVIE08092224	MASCULIN	.	.	0	0	70	.	Missing	Missing	Missing	Missing	Missing	missing	Missing	NON PARTICIPANT
MVIE08092325	MASCULIN	.	.	0	0	80	.	Missing	Missing	Missing	Missing	Missing	missing	Missing	NON PARTICIPANT
MVIE08092426	MASCULIN	0	0	0	0	66	1	No	Yes	No	Good	Better	Secondary 1st cycle	Couple	FULL PARTICIPANT
MVIE08092527	MASCULIN	.	.	0	0	66	.	Missing	Missing	Missing	Missing	Missing	missing	Missing	NON PARTICIPANT
MVIE08092628	MASCULIN	.	.	1	0	68	.	Missing	Missing	Missing	Missing	Missing	missing	Missing	PARTIAL PARTICIPANT
MVIE08092729	MASCULIN	.	.	0	0	74	.	Missing	Missing	Missing	Missing	Missing	missing	Missing	NON PARTICIPANT
MVIE08092830	MASCULIN	.	.	0	0	79	.	Missing	Missing	Missing	Missing	Missing	missing	Missing	NON PARTICIPANT
MVIE08092931	MASCULIN	.	.	0	0	67	.	Missing	Missing	Missing	Missing	Missing	missing	Missing	NON PARTICIPANT
MVIE08093032	MASCULIN	.	.	0	0	68	.	Missing	Missing	Missing	Missing	Missing	missing	Missing	NON PARTICIPANT
MVIE08093133	MASCULIN	.	.	0	0	66	.	Missing	Missing	Missing	Missing	Missing	missing	Missing	NON PARTICIPANT
MVIE08093234	MASCULIN	.	.	0	0	89	.	Missing	Missing	Missing	Missing	Missing	missing	Missing	NON PARTICIPANT
MVIE08093335	MASCULIN	.	.	0	0	93	.	Missing	Missing	Missing	Missing	Missing	missing	Missing	NON PARTICIPANT
MVIE08093436	MASCULIN	.	.	0	0	75	.	Missing	Missing	Missing	Missing	Missing	missing	Missing	NON PARTICIPANT
MVIE08093537	MASCULIN	.	.	0	0	78	.	Missing	Missing	Missing	Missing	Missing	missing	Missing	NON PARTICIPANT
MVIE08093638	MASCULIN	.	.	0	0	71	.	Missing	Missing	Missing	Missing	Missing	missing	Missing	NON PARTICIPANT
MVIE08093739	MASCULIN	.	.	0	0	79	.	Missing	Missing	Missing	Missing	Missing	missing	Missing	NON PARTICIPANT
MVIE08093840	MASCULIN	.	.	0	0	66	.	Missing	Missing	Missing	Missing	Missing	missing	Missing	NON PARTICIPANT
MVIE08093941	MASCULIN	.	.	0	0	69	4	No	No	No	Good	Do not know	Secondary 2nd cycle	Couple	PARTIAL PARTICIPANT
MVIE08094042	MASCULIN	.	.	0	0	81	.	Missing	Missing	Missing	Missing	Missing	missing	Missing	NON PARTICIPANT
MVIE08094143	MASCULIN	.	.	0	0	79	.	Missing	Missing	Missing	Missing	Missing	missing	Missing	NON PARTICIPANT
MVIE08094244	MASCULIN	.	.	0	0	85	.	Missing	Missing	Missing	Missing	Missing	missing	Missing	NON PARTICIPANT
MVIE08094345	MASCULIN	.	.	0	0	66	.	Missing	Missing	Missing	Missing	Missing	missing	Missing	NON PARTICIPANT
MVIE08094446	MASCULIN	.	.	0	0	69	1	No	Yes	No	Good	As good as	Secondary 1st cycle	Couple	PARTIAL PARTICIPANT
MVIE08094547	MASCULIN	.	.	0	0	69	.	Missing	Missing	Missing	Missing	Missing	missing	Missing	NON PARTICIPANT
MVIE08094648	MASCULIN	.	.	0	0	67	0	No	No	No	Intermediate	Better	Secondary 1st cycle	Couple	PARTIAL PARTICIPANT
MVIE08094749	MASCULIN	.	.	0	0	81	.	Missing	Missing	Missing	Missing	Missing	missing	Missing	NON PARTICIPANT
MVIE08094850	MASCULIN	.	.	0	0	70	.	Missing	Missing	Missing	Missing	Missing	missing	Missing	NON PARTICIPANT
MVIE08094951	MASCULIN	3	5	0	0	83	3	Yes	Yes	No	Intermediate	Better	Secondary 1st cycle	Single	FULL PARTICIPANT
MVIE08095052	MASCULIN	.	.	1	0	82	.	Missing	Missing	Missing	Missing	Missing	missing	Missing	NON PARTICIPANT
MVIE08095153	MASCULIN	.	.	0	0	68	.	Missing	Missing	Missing	Missing	Missing	missing	Missing	NON PARTICIPANT
MVIE08095254	MASCULIN	0	1	0	0	72	1	No	No	No	Intermediate	As good as	Higher education (short)	Couple	FULL PARTICIPANT
MVIE08095355	MASCULIN	.	.	0	0	84	2	No	No	No	Missing	Missing	Higher education - University	Non-family cohabitation	FULL PARTICIPANT
MVIE08095456	MASCULIN	3	3	0	0	71	1	No	No	No	Good	Better	Secondary 1st cycle	Single	FULL PARTICIPANT
MVIE08095557	MASCULIN	.	.	0	0	78	.	Missing	Missing	Missing	Missing	Missing	missing	Missing	NON PARTICIPANT
MVIE08095658	MASCULIN	.	.	0	0	69	.	Missing	Missing	Missing	Missing	Missing	missing	Missing	NON PARTICIPANT
MVIE08095759	MASCULIN	.	.	0	0	80	.	Yes	No	No	Missing	Missing	Secondary 1st cycle	Couple	FULL PARTICIPANT
MVIE08095860	MASCULIN	.	.	0	0	76	.	Missing	Missing	Missing	Missing	Missing	missing	Missing	NON PARTICIPANT
MVIE08095961	MASCULIN	.	.	0	0	73	.	Missing	Missing	Missing	Missing	Missing	missing	Missing	NON PARTICIPANT
MVIE08096062	MASCULIN	.	.	0	0	72	.	Missing	Missing	Missing	Missing	Missing	missing	Missing	NON PARTICIPANT
MVIE08096163	MASCULIN	.	.	1	0	80	.	Missing	Missing	Missing	Missing	Missing	missing	Missing	PARTIAL PARTICIPANT
MVIE08096264	MASCULIN	.	.	0	0	73	.	Missing	Missing	Missing	Missing	Missing	missing	Missing	NON PARTICIPANT
MVIE08096365	MASCULIN	.	.	0	0	68	.	Missing	Missing	Missing	Missing	Missing	missing	Missing	NON PARTICIPANT
MVIE08096466	MASCULIN	.	.	0	0	72	.	Missing	Missing	Missing	Missing	Missing	missing	Missing	NON PARTICIPANT
MVIE08096567	MASCULIN	13	6	0	0	72	5	No	No	No	Intermediate	Better	Primary school	Couple	FULL PARTICIPANT
MVIE08096668	MASCULIN	.	.	0	0	74	5	No	No	No	Intermediate	Do not know	No schooling	Couple	PARTIAL PARTICIPANT
MVIE08096769	MASCULIN	.	.	0	0	67	.	Missing	Missing	Missing	Missing	Missing	missing	Missing	NON PARTICIPANT
MVIE08096870	MASCULIN	.	.	0	0	80	.	Missing	Missing	Missing	Missing	Missing	missing	Missing	NON PARTICIPANT
MVIE08096971	MASCULIN	14	2	0	0	80	4	No	No	No	Intermediate	As good as	Higher education - University	Couple	FULL PARTICIPANT
MVIE08097072	MASCULIN	.	.	0	1	75	.	Missing	Missing	Missing	Missing	Missing	missing	Missing	PARTIAL PARTICIPANT
MVIE08097173	MASCULIN	.	.	0	0	78	2	No	No	No	Good	As good as	Secondary 2nd cycle	Couple	PARTIAL PARTICIPANT
MVIE08097274	MASCULIN	.	.	1	0	83	3	No	No	No	Missing	Missing	Secondary 1st cycle	Couple	FULL PARTICIPANT
MVIE08097375	MASCULIN	.	.	0	0	75	.	Missing	Missing	Missing	Missing	Missing	missing	Missing	NON PARTICIPANT
MVIE08097476	MASCULIN	.	.	0	0	76	.	Missing	Missing	Missing	Missing	Missing	missing	Missing	NON PARTICIPANT
MVIE08097577	MASCULIN	1	2	0	0	74	3	No	No	No	Intermediate	As good as	Secondary 1st cycle	Couple	FULL PARTICIPANT
MVIE08097678	MASCULIN	.	.	1	0	68	.	Missing	Missing	Missing	Missing	Missing	missing	Missing	NON PARTICIPANT
MVIE08097779	MASCULIN	.	.	0	0	72	.	Missing	Missing	Missing	Missing	Missing	missing	Missing	NON PARTICIPANT
MVIE08097880	MASCULIN	.	.	0	0	71	.	Missing	Missing	Missing	Missing	Missing	missing	Missing	NON PARTICIPANT
MVIE08097981	MASCULIN	8	5	0	0	69	0	No	No	No	Good	Better	Secondary 1st cycle	Couple	FULL PARTICIPANT
MVIE08098082	MASCULIN	3	2	0	0	68	2	No	No	No	Good	Better	Secondary 2nd cycle	Single	FULL PARTICIPANT
MVIE08098183	MASCULIN	.	.	0	0	74	.	Missing	Missing	Missing	Missing	Missing	missing	Missing	NON PARTICIPANT
MVIE08098284	MASCULIN	0	0	0	0	69	0	No	No	No	Very good	Better	Higher education (short)	Family cohabitation	FULL PARTICIPANT
MVIE08098385	MASCULIN	.	.	0	0	88	.	Missing	Missing	Missing	Missing	Missing	missing	Missing	NON PARTICIPANT
MVIE08098486	MASCULIN	.	.	0	0	67	.	Missing	Missing	Missing	Missing	Missing	missing	Missing	NON PARTICIPANT
MVIE08098587	MASCULIN	.	.	1	0	80	.	Missing	Missing	Missing	Missing	Missing	missing	Missing	NON PARTICIPANT
MVIE08098688	MASCULIN	.	.	0	0	72	.	Missing	Missing	Missing	Missing	Missing	missing	Missing	NON PARTICIPANT
MVIE08098789	MASCULIN	.	.	0	0	75	.	Missing	Missing	Missing	Missing	Missing	missing	Missing	NON PARTICIPANT
MVIE08098890	MASCULIN	.	.	0	0	84	.	Missing	Missing	Missing	Missing	Missing	missing	Missing	NON PARTICIPANT
MVIE08098991	MASCULIN	.	.	0	0	80	.	Missing	Missing	Missing	Missing	Missing	missing	Missing	NON PARTICIPANT
MVIE08099092	MASCULIN	6	2	0	0	77	2	No	No	No	Good	As good as	Secondary 1st cycle	Couple	FULL PARTICIPANT
MVIE08099193	MASCULIN	.	.	0	0	81	.	Missing	Missing	Missing	Missing	Missing	missing	Missing	NON PARTICIPANT
MVIE08099294	MASCULIN	.	.	0	0	66	.	Missing	Missing	Missing	Missing	Missing	missing	Missing	NON PARTICIPANT
MVIE08099395	MASCULIN	.	.	0	0	76	3	No	No	No	Intermediate	Do not know	Primary school	Couple	PARTIAL PARTICIPANT
MVIE08099496	MASCULIN	1	1	0	0	73	4	No	No	No	Intermediate	Better	Secondary 1st cycle	Couple	FULL PARTICIPANT
MVIE08099500	MASCULIN	.	.	0	0	73	.	Missing	Missing	Missing	Missing	Missing	missing	Missing	NON PARTICIPANT
MVIE08099601	MASCULIN	2	4	0	0	82	4	No	Yes	No	Intermediate	Worse	Secondary 2nd cycle	Couple	FULL PARTICIPANT
MVIE08099702	MASCULIN	.	.	0	0	68	.	Missing	Missing	Missing	Missing	Missing	missing	Missing	NON PARTICIPANT
MVIE08099803	MASCULIN	.	.	0	0	67	.	Missing	Missing	Missing	Missing	Missing	missing	Missing	NON PARTICIPANT
MVIE08099904	MASCULIN	.	.	0	0	81	.	Missing	Missing	Missing	Missing	Missing	missing	Missing	NON PARTICIPANT
MVIE08100005	MASCULIN	2	0	0	0	75	0	No	No	No	Good	Better	Secondary 2nd cycle	Couple	FULL PARTICIPANT
MVIE08100106	FEMININ	.	.	0	0	68	.	Missing	Missing	Missing	Missing	Missing	missing	Missing	NON PARTICIPANT
MVIE08100207	FEMININ	.	.	0	0	77	.	Missing	Missing	Missing	Missing	Missing	missing	Missing	NON PARTICIPANT
MVIE08100308	FEMININ	.	.	0	0	79	.	Missing	Missing	Missing	Missing	Missing	missing	Missing	NON PARTICIPANT
MVIE08100409	FEMININ	.	.	0	0	81	.	Missing	Missing	Missing	Missing	Missing	missing	Missing	NON PARTICIPANT
MVIE08100510	FEMININ	.	.	0	0	72	.	Missing	Missing	Missing	Missing	Missing	missing	Missing	NON PARTICIPANT
MVIE08100611	FEMININ	.	.	0	0	74	.	Missing	Missing	Missing	Missing	Missing	missing	Missing	NON PARTICIPANT
MVIE08100712	FEMININ	10	5	0	0	73	6	No	Yes	No	Good	Better	Secondary 1st cycle	Single	FULL PARTICIPANT
MVIE08100813	FEMININ	.	.	0	0	69	.	Missing	Missing	Missing	Missing	Missing	missing	Missing	NON PARTICIPANT
MVIE08100914	FEMININ	.	.	0	0	85	.	Missing	Missing	Missing	Missing	Missing	missing	Missing	NON PARTICIPANT
MVIE08101015	FEMININ	.	.	0	0	68	.	Missing	Missing	Missing	Missing	Missing	missing	Missing	NON PARTICIPANT
MVIE08101116	FEMININ	.	.	0	0	78	0	Yes	No	No	Intermediate	As good as	Secondary 1st cycle	Single	PARTIAL PARTICIPANT
MVIE08101217	FEMININ	.	.	0	0	81	.	Missing	Missing	Missing	Missing	Missing	missing	Missing	NON PARTICIPANT
MVIE08101318	FEMININ	.	.	0	0	89	.	Missing	Missing	Missing	Missing	Missing	missing	Missing	NON PARTICIPANT
MVIE08101419	FEMININ	.	4	0	0	89	2	No	No	No	Missing	Missing	Secondary 1st cycle	Non-family cohabitation	FULL PARTICIPANT
MVIE08101520	FEMININ	0	1	0	0	74	1	No	No	No	Good	Better	Primary school	Couple	FULL PARTICIPANT
MVIE08101621	FEMININ	6	6	0	0	85	1	No	No	No	Missing	Missing	Secondary 2nd cycle	Single	FULL PARTICIPANT
MVIE08101722	FEMININ	.	.	1	0	84	.	Missing	Missing	Missing	Missing	Missing	missing	Missing	NON PARTICIPANT
MVIE08101823	FEMININ	.	.	0	0	82	.	Missing	Missing	Missing	Missing	Missing	missing	Missing	NON PARTICIPANT
MVIE08101924	FEMININ	.	.	0	0	71	.	Missing	Missing	Missing	Missing	Missing	missing	Missing	NON PARTICIPANT
MVIE08102025	FEMININ	.	.	0	0	71	.	Missing	Missing	Missing	Missing	Missing	missing	Missing	NON PARTICIPANT
MVIE08102126	FEMININ	.	.	0	0	71	.	Missing	Missing	Missing	Missing	Missing	missing	Missing	NON PARTICIPANT
MVIE08102227	FEMININ	.	.	0	0	76	.	Missing	Missing	Missing	Missing	Missing	missing	Missing	NON PARTICIPANT
MVIE08102328	FEMININ	.	.	0	0	68	.	Missing	Missing	Missing	Missing	Missing	missing	Missing	NON PARTICIPANT
MVIE08102429	FEMININ	.	.	0	0	74	.	Missing	Missing	Missing	Missing	Missing	missing	Missing	NON PARTICIPANT
MVIE08102530	FEMININ	.	.	0	0	71	5	No	No	No	Intermediate	Do not know	Secondary 2nd cycle	Couple	PARTIAL PARTICIPANT
MVIE08102631	FEMININ	.	.	0	0	77	.	Missing	Missing	Missing	Missing	Missing	missing	Missing	NON PARTICIPANT
MVIE08102732	FEMININ	13	5	0	0	75	3	No	No	No	Intermediate	Better	Secondary 2nd cycle	Couple	FULL PARTICIPANT
MVIE08102833	FEMININ	.	.	0	0	81	.	Missing	Missing	Missing	Missing	Missing	missing	Missing	NON PARTICIPANT
MVIE08102934	FEMININ	.	.	0	0	67	.	Missing	Missing	Missing	Missing	Missing	missing	Missing	NON PARTICIPANT
MVIE08103035	FEMININ	4	1	1	0	86	3	Yes	No	No	Intermediate	Better	Primary school	Non-family cohabitation	FULL PARTICIPANT
MVIE08103136	FEMININ	.	.	0	0	76	.	Missing	Missing	Missing	Missing	Missing	missing	Missing	NON PARTICIPANT
MVIE08103237	FEMININ	.	.	0	0	77	.	Missing	Missing	Missing	Missing	Missing	missing	Missing	NON PARTICIPANT
MVIE08103338	FEMININ	.	.	0	0	76	.	Missing	Missing	Missing	Missing	Missing	missing	Missing	NON PARTICIPANT
MVIE08103439	FEMININ	.	.	0	0	91	4	No	No	No	Intermediate	Do not know	Primary school	Single	PARTIAL PARTICIPANT
MVIE08103540	FEMININ	.	6	0	0	81	4	No	No	No	Missing	Missing	Primary school	Couple	FULL PARTICIPANT
MVIE08103641	FEMININ	5	4	0	0	68	1	No	No	No	Good	As good as	Secondary 2nd cycle	Family cohabitation	FULL PARTICIPANT
MVIE08103742	FEMININ	0	2	0	0	74	3	No	No	No	Good	As good as	Secondary 1st cycle	Single	FULL PARTICIPANT
MVIE08103843	FEMININ	.	.	0	0	67	.	No	No	No	Missing	Missing	Primary school	Single	FULL PARTICIPANT
MVIE08103944	FEMININ	.	.	0	0	71	.	Missing	Missing	Missing	Missing	Missing	missing	Missing	NON PARTICIPANT
MVIE08104045	FEMININ	.	.	0	0	69	.	Missing	Missing	Missing	Missing	Missing	missing	Missing	NON PARTICIPANT
MVIE08104146	FEMININ	.	.	0	0	74	.	Missing	Missing	Missing	Missing	Missing	missing	Missing	NON PARTICIPANT
MVIE08104247	FEMININ	.	.	0	0	69	.	Missing	Missing	Missing	Missing	Missing	missing	Missing	NON PARTICIPANT
MVIE08104348	FEMININ	.	.	0	0	89	.	Missing	Missing	Missing	Missing	Missing	missing	Missing	NON PARTICIPANT
MVIE08104449	FEMININ	.	.	0	0	73	.	Missing	Missing	Missing	Missing	Missing	missing	Missing	NON PARTICIPANT
MVIE08104550	FEMININ	.	.	0	0	82	.	Missing	Missing	Missing	Missing	Missing	missing	Missing	NON PARTICIPANT
MVIE08104651	FEMININ	.	.	0	0	72	.	Missing	Missing	Missing	Missing	Missing	missing	Missing	NON PARTICIPANT
MVIE08104752	FEMININ	.	.	0	0	86	.	Missing	Missing	Missing	Missing	Missing	missing	Missing	NON PARTICIPANT
MVIE08104853	FEMININ	0	0	0	0	66	1	No	No	No	Good	Better	Secondary 2nd cycle	Single	FULL PARTICIPANT
MVIE08104954	FEMININ	.	.	0	0	66	.	Missing	Missing	Missing	Missing	Missing	missing	Missing	NON PARTICIPANT
MVIE08105055	FEMININ	.	.	0	0	77	.	Missing	Missing	Missing	Missing	Missing	missing	Missing	NON PARTICIPANT
MVIE08105156	FEMININ	29	8	0	0	71	0	No	No	No	Intermediate	Better	Secondary 1st cycle	Family cohabitation	FULL PARTICIPANT
MVIE08105257	FEMININ	.	.	0	0	77	.	Missing	Missing	Missing	Missing	Missing	missing	Missing	NON PARTICIPANT
MVIE08105358	FEMININ	.	.	1	0	94	.	Missing	Missing	Missing	Missing	Missing	missing	Missing	NON PARTICIPANT
MVIE08105459	FEMININ	.	.	0	0	80	.	Missing	Missing	Missing	Missing	Missing	missing	Missing	NON PARTICIPANT
MVIE08105560	FEMININ	3	5	0	0	71	1	No	No	No	Good	As good as	Secondary 1st cycle	Couple	FULL PARTICIPANT
MVIE08105661	FEMININ	.	.	0	0	79	.	Missing	Missing	Missing	Missing	Missing	missing	Missing	NON PARTICIPANT
MVIE08105762	FEMININ	.	.	0	0	68	.	Missing	Missing	Missing	Missing	Missing	missing	Missing	NON PARTICIPANT
MVIE08105863	FEMININ	.	.	0	0	71	.	Missing	Missing	Missing	Missing	Missing	missing	Missing	NON PARTICIPANT
MVIE08105964	FEMININ	7	1	0	0	74	2	No	No	No	Very good	Better	Secondary 2nd cycle	Non-family cohabitation	FULL PARTICIPANT
MVIE08106065	FEMININ	.	.	0	0	83	.	Missing	Missing	Missing	Missing	Missing	missing	Missing	NON PARTICIPANT
MVIE08106166	FEMININ	.	.	1	0	90	.	Missing	Missing	Missing	Missing	Missing	missing	Missing	NON PARTICIPANT
MVIE08106267	FEMININ	.	.	0	0	77	.	Missing	Missing	Missing	Missing	Missing	missing	Missing	NON PARTICIPANT
MVIE08106368	FEMININ	.	.	0	0	73	0	No	No	No	Very good	Better	Secondary 2nd cycle	Single	PARTIAL PARTICIPANT
MVIE08106469	FEMININ	.	.	0	0	66	.	Missing	Missing	Missing	Missing	Missing	missing	Missing	NON PARTICIPANT
MVIE08106570	FEMININ	0	2	0	0	83	1	No	No	No	Good	As good as	Secondary 1st cycle	Single	FULL PARTICIPANT
MVIE08106671	FEMININ	.	.	0	0	72	.	Missing	Missing	Missing	Missing	Missing	missing	Missing	NON PARTICIPANT
MVIE08106772	FEMININ	.	.	0	0	77	3	Yes	No	No	Intermediate	As good as	Primary school	Single	PARTIAL PARTICIPANT
MVIE08106873	FEMININ	6	1	0	0	70	0	No	No	No	Intermediate	Better	Primary school	Couple	FULL PARTICIPANT
MVIE08106974	FEMININ	.	.	0	1	82	.	Missing	Missing	Missing	Missing	Missing	missing	Missing	NON PARTICIPANT
MVIE08107075	FEMININ	.	.	0	0	85	.	Missing	Missing	Missing	Missing	Missing	missing	Missing	NON PARTICIPANT
MVIE08107176	FEMININ	.	.	0	0	67	.	Missing	Missing	Missing	Missing	Missing	missing	Missing	NON PARTICIPANT
MVIE08107277	FEMININ	.	.	0	0	76	1	Do not know	No	No	Intermediate	Do not know	Secondary 1st cycle	Single	PARTIAL PARTICIPANT
MVIE08107378	FEMININ	.	.	0	0	70	.	Missing	Missing	Missing	Missing	Missing	missing	Missing	NON PARTICIPANT
MVIE08107479	FEMININ	.	.	0	1	87	.	Missing	Missing	Missing	Missing	Missing	missing	Missing	NON PARTICIPANT
MVIE08107580	FEMININ	.	.	0	0	75	0	No	No	No	Very good	Do not know	Primary school	Couple	PARTIAL PARTICIPANT
MVIE08107681	FEMININ	.	.	0	0	77	.	Missing	Missing	Missing	Missing	Missing	missing	Missing	NON PARTICIPANT
MVIE08107782	FEMININ	.	.	0	0	80	.	Missing	Missing	Missing	Missing	Missing	missing	Missing	NON PARTICIPANT
MVIE08107883	FEMININ	1	0	0	0	71	1	No	No	No	Good	Better	Secondary 1st cycle	Single	FULL PARTICIPANT
MVIE08107984	FEMININ	.	.	0	0	68	.	Missing	Missing	Missing	Missing	Missing	missing	Missing	NON PARTICIPANT
MVIE08108085	FEMININ	.	.	0	0	87	.	Missing	Missing	Missing	Missing	Missing	missing	Missing	NON PARTICIPANT
MVIE08108186	FEMININ	.	.	1	0	99	.	Missing	Missing	Missing	Missing	Missing	missing	Missing	NON PARTICIPANT
MVIE08108287	FEMININ	.	.	0	0	67	.	Missing	Missing	Missing	Missing	Missing	missing	Missing	NON PARTICIPANT
MVIE08108388	FEMININ	.	1	0	0	85	1	No	No	No	Good	Better	Secondary 1st cycle	Single	FULL PARTICIPANT
MVIE08108489	FEMININ	.	.	0	0	68	.	Missing	Missing	Missing	Missing	Missing	missing	Missing	NON PARTICIPANT
MVIE08108590	FEMININ	.	.	0	0	74	.	Missing	Missing	Missing	Missing	Missing	missing	Missing	NON PARTICIPANT
MVIE08108691	FEMININ	.	.	0	0	79	2	No	No	No	Missing	Missing	Secondary 1st cycle	Couple	FULL PARTICIPANT
MVIE08108792	FEMININ	0	2	0	0	70	3	No	No	No	Good	Better	Secondary 1st cycle	Single	FULL PARTICIPANT
MVIE08108893	FEMININ	.	.	0	0	86	.	Missing	Missing	Missing	Missing	Missing	missing	Missing	NON PARTICIPANT
MVIE08108994	FEMININ	1	2	0	0	70	1	No	No	No	Intermediate	As good as	Higher education (short)	Couple	FULL PARTICIPANT
MVIE08109095	FEMININ	.	.	0	0	70	.	Missing	Missing	Missing	Missing	Missing	missing	Missing	NON PARTICIPANT
MVIE08109196	FEMININ	.	.	0	0	94	.	Missing	Missing	Missing	Missing	Missing	missing	Missing	NON PARTICIPANT
MVIE08109200	FEMININ	.	.	0	0	82	.	Missing	Missing	Missing	Missing	Missing	missing	Missing	NON PARTICIPANT
MVIE08109301	FEMININ	.	.	0	0	80	.	Missing	Missing	Missing	Missing	Missing	missing	Missing	NON PARTICIPANT
MVIE08109402	FEMININ	.	.	0	0	74	.	Missing	Missing	Missing	Missing	Missing	missing	Missing	NON PARTICIPANT
MVIE08109503	FEMININ	.	.	0	0	75	.	Missing	Missing	Missing	Missing	Missing	missing	Missing	NON PARTICIPANT
MVIE08109604	FEMININ	.	.	0	0	66	.	Missing	Missing	Missing	Missing	Missing	missing	Missing	NON PARTICIPANT
MVIE08109705	FEMININ	.	.	0	0	69	.	Missing	Missing	Missing	Missing	Missing	missing	Missing	NON PARTICIPANT
MVIE08109806	FEMININ	.	.	0	0	82	.	Missing	Missing	Missing	Missing	Missing	missing	Missing	NON PARTICIPANT
MVIE08109907	FEMININ	.	.	0	0	78	0	No	No	No	Good	As good as	Secondary 1st cycle	Single	PARTIAL PARTICIPANT
MVIE08110008	FEMININ	.	.	0	0	78	.	Missing	Missing	Missing	Missing	Missing	missing	Missing	NON PARTICIPANT
MVIE08110109	FEMININ	.	.	0	0	88	.	Missing	Missing	Missing	Missing	Missing	missing	Missing	NON PARTICIPANT
MVIE08110210	FEMININ	.	.	0	0	72	.	Missing	Missing	Missing	Missing	Missing	missing	Missing	NON PARTICIPANT
MVIE08110311	FEMININ	18	5	0	0	70	2	No	No	No	Intermediate	Worse	Primary school	Couple	FULL PARTICIPANT
MVIE08110412	FEMININ	.	.	1	0	84	.	Missing	Missing	Missing	Missing	Missing	missing	Missing	NON PARTICIPANT
MVIE08110513	FEMININ	.	.	0	1	83	1	Yes	No	No	Good	Do not know	Primary school	Family cohabitation	FULL PARTICIPANT
MVIE08110614	FEMININ	1	0	0	0	66	0	No	No	No	Good	Better	Secondary 2nd cycle	Single	FULL PARTICIPANT
MVIE08110715	FEMININ	.	.	0	0	84	.	Missing	Missing	Missing	Missing	Missing	missing	Missing	NON PARTICIPANT
MVIE08110816	FEMININ	.	.	0	0	80	.	Missing	Missing	Missing	Missing	Missing	missing	Missing	NON PARTICIPANT
MVIE08110917	FEMININ	.	.	0	0	82	0	No	No	No	Missing	Missing	Secondary 1st cycle	Non-family cohabitation	FULL PARTICIPANT
MVIE08111018	FEMININ	8	3	0	0	68	3	No	No	No	Good	Better	Primary school	Couple	FULL PARTICIPANT
MVIE08111119	FEMININ	.	.	0	0	89	.	Missing	Missing	Missing	Missing	Missing	missing	Missing	NON PARTICIPANT
MVIE08111220	FEMININ	6	3	0	0	78	6	No	No	No	Good	As good as	Higher education (short)	Couple	FULL PARTICIPANT
MVIE08111321	MASCULIN	.	.	0	0	72	.	Missing	Missing	Missing	Missing	Missing	missing	Missing	NON PARTICIPANT
MVIE08111422	MASCULIN	.	.	0	0	76	.	Missing	Missing	Missing	Missing	Missing	missing	Missing	NON PARTICIPANT
MVIE08111523	MASCULIN	.	.	0	0	85	.	Missing	Missing	Missing	Missing	Missing	missing	Missing	NON PARTICIPANT
MVIE08111624	MASCULIN	.	.	0	0	66	.	Missing	Missing	Missing	Missing	Missing	missing	Missing	NON PARTICIPANT
MVIE08111725	MASCULIN	.	.	1	0	86	.	Missing	Missing	Missing	Missing	Missing	missing	Missing	NON PARTICIPANT
MVIE08111826	MASCULIN	.	.	1	0	77	.	Missing	Missing	Missing	Missing	Missing	missing	Missing	NON PARTICIPANT
MVIE08111927	MASCULIN	.	.	0	0	68	0	No	Yes	No	Good	Do not know	Primary school	Single	PARTIAL PARTICIPANT
MVIE08112028	MASCULIN	3	4	0	0	72	0	No	Yes	No	Very good	Do not know	Primary school	Couple	FULL PARTICIPANT
MVIE08112129	MASCULIN	.	.	0	0	75	.	Missing	Missing	Missing	Missing	Missing	missing	Missing	NON PARTICIPANT
MVIE08112230	MASCULIN	.	.	0	0	81	.	Missing	Missing	Missing	Missing	Missing	missing	Missing	NON PARTICIPANT
MVIE08112331	MASCULIN	.	.	0	0	78	.	Missing	Missing	Missing	Missing	Missing	missing	Missing	NON PARTICIPANT
MVIE08112432	MASCULIN	.	.	0	0	72	.	Missing	Missing	Missing	Missing	Missing	missing	Missing	NON PARTICIPANT
MVIE08112533	MASCULIN	9	2	0	0	68	1	No	Yes	No	Good	As good as	Higher education (short)	Couple	FULL PARTICIPANT
MVIE08112634	MASCULIN	2	1	0	0	71	0	No	No	No	Intermediate	Better	Higher education - University	Couple	FULL PARTICIPANT
MVIE08112735	MASCULIN	.	.	1	0	71	.	Missing	Missing	Missing	Missing	Missing	missing	Missing	NON PARTICIPANT
MVIE08112836	MASCULIN	1	1	0	0	68	1	No	No	No	Good	Better	Higher education (short)	Couple	FULL PARTICIPANT
MVIE08112937	MASCULIN	.	.	0	0	76	0	No	Yes	No	Intermediate	Worse	Secondary 1st cycle	Couple	PARTIAL PARTICIPANT
MVIE08113038	MASCULIN	2	0	0	0	73	1	No	No	No	Very good	As good as	Secondary 1st cycle	Couple	FULL PARTICIPANT
MVIE08113139	MASCULIN	.	.	0	0	67	6	Yes	No	No	Bad	Worse	Secondary 2nd cycle	Couple	PARTIAL PARTICIPANT
MVIE08113240	MASCULIN	.	.	0	0	67	.	Missing	Missing	Missing	Missing	Missing	missing	Missing	NON PARTICIPANT
MVIE08113341	MASCULIN	.	.	0	0	70	2	No	No	No	Very good	As good as	Secondary 2nd cycle	Couple	PARTIAL PARTICIPANT
MVIE08113442	MASCULIN	.	.	0	0	72	.	Missing	Missing	Missing	Missing	Missing	missing	Missing	NON PARTICIPANT
MVIE08113543	MASCULIN	.	.	0	0	80	.	Missing	Missing	Missing	Missing	Missing	missing	Missing	NON PARTICIPANT
MVIE08113644	MASCULIN	.	.	0	0	82	.	Missing	Missing	Missing	Missing	Missing	missing	Missing	NON PARTICIPANT
MVIE08113745	MASCULIN	0	1	0	0	68	2	No	No	No	Good	As good as	Higher education (short)	Couple	FULL PARTICIPANT
MVIE08113846	MASCULIN	.	.	0	0	69	.	Missing	Missing	Missing	Missing	Missing	missing	Missing	NON PARTICIPANT
MVIE08113947	MASCULIN	.	.	0	0	76	.	Missing	Missing	Missing	Missing	Missing	missing	Missing	NON PARTICIPANT
MVIE08114048	MASCULIN	0	2	0	0	69	0	No	No	No	Bad	Worse	Secondary 2nd cycle	Single	FULL PARTICIPANT
MVIE08114149	MASCULIN	5	1	0	0	72	3	No	No	No	Good	Better	Higher education (short)	Couple	FULL PARTICIPANT
MVIE08114250	MASCULIN	.	.	0	0	76	.	Missing	Missing	Missing	Missing	Missing	missing	Missing	NON PARTICIPANT
MVIE08114351	MASCULIN	.	.	0	0	75	1	No	No	No	Intermediate	As good as	Primary school	Couple	PARTIAL PARTICIPANT
MVIE08114452	MASCULIN	.	.	0	1	80	.	Missing	Missing	Missing	Missing	Missing	missing	Missing	NON PARTICIPANT
MVIE08114553	MASCULIN	.	.	0	0	69	.	Missing	Missing	Missing	Missing	Missing	missing	Missing	NON PARTICIPANT
MVIE08114654	MASCULIN	.	.	0	0	73	.	Missing	Missing	Missing	Missing	Missing	missing	Missing	NON PARTICIPANT
MVIE08114755	MASCULIN	.	.	0	0	67	.	Missing	Missing	Missing	Missing	Missing	missing	Missing	NON PARTICIPANT
MVIE08114856	MASCULIN	.	.	0	0	69	7	No	No	No	Intermediate	As good as	Secondary 2nd cycle	Couple	PARTIAL PARTICIPANT
MVIE08114957	MASCULIN	0	0	0	0	74	0	No	No	No	Good	Better	Secondary 2nd cycle	Couple	FULL PARTICIPANT
MVIE08115058	MASCULIN	.	.	0	0	67	2	Yes	No	No	Good	As good as	Secondary 1st cycle	Couple	PARTIAL PARTICIPANT
MVIE08115159	MASCULIN	.	.	0	0	71	0	No	No	No	Very good	Better	Secondary 1st cycle	Couple	FULL PARTICIPANT
MVIE08115260	MASCULIN	.	.	0	0	80	.	Missing	Missing	Missing	Missing	Missing	missing	Missing	NON PARTICIPANT
MVIE08115361	MASCULIN	.	.	0	0	67	0	No	No	No	Intermediate	Better	Secondary 1st cycle	Couple	PARTIAL PARTICIPANT
MVIE08115462	MASCULIN	.	.	0	0	81	.	Missing	Missing	Missing	Missing	Missing	missing	Missing	NON PARTICIPANT
MVIE08115563	MASCULIN	.	.	0	0	76	.	Missing	Missing	Missing	Missing	Missing	missing	Missing	NON PARTICIPANT
MVIE08115664	MASCULIN	.	.	0	0	87	.	Missing	Missing	Missing	Missing	Missing	missing	Missing	NON PARTICIPANT
MVIE08115765	MASCULIN	.	.	0	0	77	1	Yes	Yes	No	Bad	Do not know	Primary school	Couple	FULL PARTICIPANT
MVIE08115866	MASCULIN	.	.	0	0	68	.	Missing	Missing	Missing	Missing	Missing	missing	Missing	NON PARTICIPANT
MVIE08115967	MASCULIN	.	.	0	0	67	.	Missing	Missing	Missing	Missing	Missing	missing	Missing	NON PARTICIPANT
MVIE08116068	MASCULIN	.	.	0	0	81	.	Missing	Missing	Missing	Missing	Missing	missing	Missing	NON PARTICIPANT
MVIE08116169	MASCULIN	.	.	0	0	72	3	No	Yes	No	Intermediate	Worse	Secondary 1st cycle	Family cohabitation	PARTIAL PARTICIPANT
MVIE08116270	MASCULIN	.	.	0	0	67	0	No	No	No	Good	As good as	Primary school	Couple	PARTIAL PARTICIPANT
MVIE08116371	MASCULIN	.	.	0	0	72	.	Missing	Missing	Missing	Missing	Missing	missing	Missing	NON PARTICIPANT
MVIE08116472	MASCULIN	.	.	0	0	86	.	Missing	Missing	Missing	Missing	Missing	missing	Missing	NON PARTICIPANT
MVIE08116573	MASCULIN	0	1	0	0	69	0	Yes	No	No	Do not know	Better	Secondary 2nd cycle	Single	FULL PARTICIPANT
MVIE08116674	MASCULIN	.	.	0	0	66	.	Missing	Missing	Missing	Missing	Missing	missing	Missing	NON PARTICIPANT
MVIE08116775	MASCULIN	.	.	0	0	77	.	Missing	Missing	Missing	Missing	Missing	missing	Missing	NON PARTICIPANT
MVIE08116876	MASCULIN	.	.	1	0	82	.	Missing	Missing	Missing	Missing	Missing	missing	Missing	NON PARTICIPANT
MVIE08116977	MASCULIN	.	.	0	0	78	.	Missing	Missing	Missing	Missing	Missing	missing	Missing	NON PARTICIPANT
MVIE08117078	MASCULIN	.	.	0	0	79	.	Missing	Missing	Missing	Missing	Missing	missing	Missing	NON PARTICIPANT
MVIE08117179	MASCULIN	.	.	0	0	66	.	Missing	Missing	Missing	Missing	Missing	missing	Missing	NON PARTICIPANT
MVIE08117280	MASCULIN	.	.	0	0	74	.	Missing	Missing	Missing	Missing	Missing	missing	Missing	NON PARTICIPANT
MVIE08117381	MASCULIN	.	.	1	0	71	.	Missing	Missing	Missing	Missing	Missing	missing	Missing	NON PARTICIPANT
MVIE08117482	MASCULIN	.	.	0	0	70	.	Missing	Missing	Missing	Missing	Missing	missing	Missing	NON PARTICIPANT
MVIE08117583	MASCULIN	.	.	0	0	78	0	No	No	No	Good	As good as	Primary school	Couple	PARTIAL PARTICIPANT
MVIE08117684	MASCULIN	.	.	1	0	75	.	Missing	Missing	Missing	Missing	Missing	missing	Missing	NON PARTICIPANT
MVIE08117785	MASCULIN	.	.	0	0	66	.	Missing	Missing	Missing	Missing	Missing	missing	Missing	NON PARTICIPANT
MVIE08117886	MASCULIN	.	.	0	0	67	.	Missing	Missing	Missing	Missing	Missing	missing	Missing	NON PARTICIPANT
MVIE08117987	MASCULIN	.	.	0	0	68	2	No	No	No	Very good	Do not know	Secondary 1st cycle	Couple	PARTIAL PARTICIPANT
MVIE08118088	MASCULIN	.	.	0	0	70	.	Missing	Missing	Missing	Missing	Missing	missing	Missing	NON PARTICIPANT
MVIE08118189	MASCULIN	.	.	0	0	69	.	Missing	Missing	Missing	Missing	Missing	missing	Missing	NON PARTICIPANT
MVIE08118290	MASCULIN	0	0	0	0	68	1	No	No	No	Good	Better	Secondary 1st cycle	Couple	FULL PARTICIPANT
MVIE08118391	MASCULIN	4	1	0	0	68	1	No	Yes	No	Good	As good as	Secondary 1st cycle	Couple	FULL PARTICIPANT
MVIE08118492	MASCULIN	.	.	0	0	82	.	Missing	Missing	Missing	Missing	Missing	missing	Missing	NON PARTICIPANT
MVIE08118593	MASCULIN	.	.	0	0	70	1	No	Yes	No	Good	Better	Primary school	Couple	PARTIAL PARTICIPANT
MVIE08118694	MASCULIN	.	.	1	0	78	.	Missing	Missing	Missing	Missing	Missing	missing	Missing	NON PARTICIPANT
MVIE08118795	MASCULIN	2	6	0	0	71	2	No	Yes	No	Intermediate	Worse	Primary school	Single	FULL PARTICIPANT
MVIE08118896	MASCULIN	.	.	0	0	76	.	Missing	Missing	Missing	Missing	Missing	missing	Missing	NON PARTICIPANT
MVIE08118900	MASCULIN	.	.	0	0	67	.	Missing	Missing	Missing	Missing	Missing	missing	Missing	NON PARTICIPANT
MVIE08119001	MASCULIN	.	.	0	0	73	0	No	No	No	Good	Do not know	Higher education - University	Couple	PARTIAL PARTICIPANT
MVIE08119102	MASCULIN	.	.	0	0	66	.	Missing	Missing	Missing	Missing	Missing	missing	Missing	NON PARTICIPANT
MVIE08119203	MASCULIN	.	.	0	0	78	.	Missing	Missing	Missing	Missing	Missing	missing	Missing	NON PARTICIPANT
MVIE08119304	MASCULIN	.	.	0	0	82	.	Missing	Missing	Missing	Missing	Missing	missing	Missing	NON PARTICIPANT
MVIE08119405	MASCULIN	.	.	0	0	71	.	Missing	Missing	Missing	Missing	Missing	missing	Missing	NON PARTICIPANT
MVIE08119506	MASCULIN	.	.	0	0	67	.	Missing	Missing	Missing	Missing	Missing	missing	Missing	NON PARTICIPANT
MVIE08119607	MASCULIN	.	.	0	0	80	.	Missing	Missing	Missing	Missing	Missing	missing	Missing	NON PARTICIPANT
MVIE08119708	MASCULIN	0	1	0	0	72	0	No	No	No	Intermediate	Better	Primary school	Couple	FULL PARTICIPANT
MVIE08119809	MASCULIN	.	.	0	0	69	.	Missing	Missing	Missing	Missing	Missing	missing	Missing	NON PARTICIPANT
MVIE08119910	MASCULIN	.	.	0	0	68	.	Missing	Missing	Missing	Missing	Missing	missing	Missing	NON PARTICIPANT
MVIE08120011	MASCULIN	.	.	0	0	74	.	Missing	Missing	Missing	Missing	Missing	missing	Missing	NON PARTICIPANT
MVIE08120112	FEMININ	.	.	0	0	89	1	No	Yes	No	Good	Better	Secondary 2nd cycle	Couple	PARTIAL PARTICIPANT
MVIE08120213	FEMININ	.	.	0	0	73	2	No	No	No	Intermediate	As good as	Secondary 2nd cycle	Couple	PARTIAL PARTICIPANT
MVIE08120314	FEMININ	.	.	0	0	83	.	Missing	Missing	Missing	Missing	Missing	missing	Missing	NON PARTICIPANT
MVIE08120415	FEMININ	12	8	0	0	74	7	No	No	No	Intermediate	Better	Primary school	Single	FULL PARTICIPANT
MVIE08120516	FEMININ	.	.	0	0	75	.	Missing	Missing	Missing	Missing	Missing	missing	Missing	NON PARTICIPANT
MVIE08120617	FEMININ	.	.	0	0	80	.	Missing	Missing	Missing	Missing	Missing	missing	Missing	NON PARTICIPANT
MVIE08120718	FEMININ	.	.	0	0	99	.	Missing	Missing	Missing	Missing	Missing	missing	Missing	NON PARTICIPANT
MVIE08120819	FEMININ	.	.	0	0	80	1	No	No	No	Missing	Missing	Secondary 1st cycle	Single	PARTIAL PARTICIPANT
MVIE08120920	FEMININ	9	3	0	0	80	3	No	No	No	Good	As good as	Secondary 1st cycle	Non-family cohabitation	FULL PARTICIPANT
MVIE08121021	FEMININ	.	.	0	0	80	1	No	No	No	Intermediate	Better	Primary school	Family cohabitation	PARTIAL PARTICIPANT
MVIE08121122	FEMININ	.	.	0	0	75	.	Missing	Missing	Missing	Missing	Missing	missing	Missing	NON PARTICIPANT
MVIE08121223	FEMININ	.	.	0	0	71	0	No	No	No	Good	Better	No schooling	Couple	PARTIAL PARTICIPANT
MVIE08121324	FEMININ	.	.	0	0	76	.	Missing	Missing	Missing	Missing	Missing	missing	Missing	NON PARTICIPANT
MVIE08121425	FEMININ	.	.	0	0	70	.	Missing	Missing	Missing	Missing	Missing	missing	Missing	NON PARTICIPANT
MVIE08121526	FEMININ	.	.	0	0	69	.	Missing	Missing	Missing	Missing	Missing	missing	Missing	NON PARTICIPANT
MVIE08121627	FEMININ	.	.	0	0	87	.	Missing	Missing	Missing	Missing	Missing	missing	Missing	NON PARTICIPANT
MVIE08121728	FEMININ	5	3	0	0	68	5	No	No	No	Good	Better	Secondary 2nd cycle	Couple	FULL PARTICIPANT
MVIE08121829	FEMININ	.	.	0	0	78	.	Missing	Missing	Missing	Missing	Missing	missing	Missing	NON PARTICIPANT
MVIE08121930	FEMININ	9	6	0	0	66	1	No	No	No	Good	Better	Primary school	Couple	FULL PARTICIPANT
MVIE08122031	FEMININ	.	.	0	0	79	.	Missing	Missing	Missing	Missing	Missing	missing	Missing	NON PARTICIPANT
MVIE08122132	FEMININ	.	.	0	0	86	.	Missing	Missing	Missing	Missing	Missing	missing	Missing	NON PARTICIPANT
MVIE08122233	FEMININ	.	.	0	0	76	.	Missing	Missing	Missing	Missing	Missing	missing	Missing	NON PARTICIPANT
MVIE08122334	FEMININ	.	.	0	0	68	.	Missing	Missing	Missing	Missing	Missing	missing	Missing	NON PARTICIPANT
MVIE08122435	FEMININ	45	3	0	0	67	1	No	No	No	Missing	Missing	Primary school	Couple	FULL PARTICIPANT
MVIE08122536	FEMININ	3	0	0	0	75	0	No	No	No	Good	As good as	Secondary 1st cycle	Single	FULL PARTICIPANT
MVIE08122637	FEMININ	13	8	0	0	72	5	No	No	No	Intermediate	As good as	Primary school	Couple	FULL PARTICIPANT
MVIE08122738	FEMININ	.	.	0	1	83	.	Missing	Missing	Missing	Missing	Missing	missing	Missing	NON PARTICIPANT
MVIE08122839	FEMININ	.	.	0	0	74	.	Missing	Missing	Missing	Missing	Missing	missing	Missing	NON PARTICIPANT
MVIE08122940	FEMININ	.	.	0	0	78	.	Missing	Missing	Missing	Missing	Missing	missing	Missing	NON PARTICIPANT
MVIE08123041	FEMININ	.	.	0	0	72	.	Missing	Missing	Missing	Missing	Missing	missing	Missing	NON PARTICIPANT
MVIE08123142	FEMININ	1	0	0	0	70	2	No	No	No	Good	Better	Secondary 1st cycle	Single	FULL PARTICIPANT
MVIE08123243	FEMININ	.	.	0	0	73	.	Missing	Missing	Missing	Missing	Missing	missing	Missing	NON PARTICIPANT
MVIE08123344	FEMININ	.	.	0	0	71	.	Missing	Missing	Missing	Missing	Missing	missing	Missing	NON PARTICIPANT
MVIE08123445	FEMININ	.	.	0	0	78	.	Missing	Missing	Missing	Missing	Missing	missing	Missing	NON PARTICIPANT
MVIE08123546	FEMININ	0	2	0	0	68	0	No	No	No	Very good	Better	Secondary 2nd cycle	Couple	FULL PARTICIPANT
MVIE08123647	FEMININ	.	.	0	0	84	.	Missing	Missing	Missing	Missing	Missing	missing	Missing	NON PARTICIPANT
MVIE08123748	FEMININ	.	.	0	0	79	.	Missing	Missing	Missing	Missing	Missing	missing	Missing	NON PARTICIPANT
MVIE08123849	FEMININ	.	.	0	0	73	.	Missing	Missing	Missing	Missing	Missing	missing	Missing	NON PARTICIPANT
MVIE08123950	FEMININ	.	.	0	0	69	.	Missing	Missing	Missing	Missing	Missing	missing	Missing	NON PARTICIPANT
MVIE08124051	FEMININ	.	.	0	0	75	.	Missing	Missing	Missing	Missing	Missing	missing	Missing	NON PARTICIPANT
MVIE08124152	FEMININ	.	.	0	0	80	.	Missing	Missing	Missing	Missing	Missing	missing	Missing	NON PARTICIPANT
MVIE08124253	FEMININ	.	.	0	0	66	.	Missing	Missing	Missing	Missing	Missing	missing	Missing	NON PARTICIPANT
MVIE08124354	FEMININ	.	.	0	0	77	2	No	No	No	Very good	Better	Primary school	Family cohabitation	PARTIAL PARTICIPANT
MVIE08124455	FEMININ	.	.	0	0	86	.	Missing	Missing	Missing	Missing	Missing	missing	Missing	NON PARTICIPANT
MVIE08124556	FEMININ	8	3	0	0	84	0	Yes	No	No	Good	Better	Primary school	Couple	FULL PARTICIPANT
MVIE08124657	FEMININ	4	0	0	0	67	3	Yes	No	No	Good	Better	Higher education (short)	Single	FULL PARTICIPANT
MVIE08124758	FEMININ	.	.	0	0	69	.	Missing	Missing	Missing	Missing	Missing	missing	Missing	NON PARTICIPANT
MVIE08124859	FEMININ	2	1	0	0	68	0	No	No	No	Intermediate	As good as	Secondary 1st cycle	Couple	FULL PARTICIPANT
MVIE08124960	FEMININ	.	.	0	0	66	.	Missing	Missing	Missing	Missing	Missing	missing	Missing	NON PARTICIPANT
MVIE08125061	FEMININ	.	.	0	0	76	4	Yes	No	No	Bad	As good as	Primary school	Single	PARTIAL PARTICIPANT
MVIE08125162	FEMININ	8	2	0	0	75	2	No	No	No	Good	Better	Secondary 1st cycle	Couple	FULL PARTICIPANT
MVIE08125263	FEMININ	.	.	0	0	78	.	Missing	Missing	Missing	Missing	Missing	missing	Missing	NON PARTICIPANT
MVIE08125364	FEMININ	.	.	1	0	96	.	Missing	Missing	Missing	Missing	Missing	missing	Missing	NON PARTICIPANT
MVIE08125465	FEMININ	.	.	0	0	83	.	Missing	Missing	Missing	Missing	Missing	missing	Missing	NON PARTICIPANT
MVIE08125566	FEMININ	.	.	0	0	84	.	Missing	Missing	Missing	Missing	Missing	missing	Missing	NON PARTICIPANT
MVIE08125667	FEMININ	.	.	0	0	79	.	Missing	Missing	Missing	Missing	Missing	missing	Missing	NON PARTICIPANT
MVIE08125768	FEMININ	.	.	0	0	68	0	No	No	No	Intermediate	As good as	No schooling	Couple	PARTIAL PARTICIPANT
MVIE08125869	FEMININ	.	.	0	0	75	.	Missing	Missing	Missing	Missing	Missing	missing	Missing	NON PARTICIPANT
MVIE08125970	FEMININ	.	.	0	0	72	.	Missing	Missing	Missing	Missing	Missing	missing	Missing	NON PARTICIPANT
MVIE08126071	FEMININ	.	.	0	0	75	.	Missing	Missing	Missing	Missing	Missing	missing	Missing	NON PARTICIPANT
MVIE08126172	FEMININ	.	.	0	0	96	2	No	No	No	Bad	Do not know	Secondary 2nd cycle	Single	PARTIAL PARTICIPANT
MVIE08126273	FEMININ	.	.	0	0	85	.	Missing	Missing	Missing	Missing	Missing	missing	Missing	NON PARTICIPANT
MVIE08126374	FEMININ	1	1	0	0	69	1	No	No	No	Good	Better	Secondary 1st cycle	Couple	FULL PARTICIPANT
MVIE08126475	FEMININ	.	.	0	0	72	.	Missing	Missing	Missing	Missing	Missing	missing	Missing	NON PARTICIPANT
MVIE08126576	FEMININ	.	.	0	0	68	3	No	No	No	Good	Do not know	Primary school	Couple	PARTIAL PARTICIPANT
MVIE08126677	FEMININ	.	.	0	0	71	.	Missing	Missing	Missing	Missing	Missing	missing	Missing	NON PARTICIPANT
MVIE08126778	FEMININ	.	.	0	0	72	.	Missing	Missing	Missing	Missing	Missing	missing	Missing	NON PARTICIPANT
MVIE08126879	FEMININ	.	.	0	0	71	.	Missing	Missing	Missing	Missing	Missing	missing	Missing	NON PARTICIPANT
MVIE08126980	FEMININ	.	.	0	0	71	.	Missing	Missing	Missing	Missing	Missing	missing	Missing	NON PARTICIPANT
MVIE08127081	FEMININ	.	.	0	1	92	.	Missing	Missing	Missing	Missing	Missing	missing	Missing	NON PARTICIPANT
MVIE08127182	FEMININ	.	.	0	0	68	0	No	No	No	Very good	Do not know	Primary school	Couple	PARTIAL PARTICIPANT
MVIE08127283	FEMININ	28	4	0	1	84	7	No	No	No	Intermediate	As good as	Primary school	Non-family cohabitation	FULL PARTICIPANT
MVIE08127384	FEMININ	.	.	0	0	77	7	Yes	Yes	No	Bad	Do not know	Primary school	Single	PARTIAL PARTICIPANT
MVIE08127485	FEMININ	.	.	0	0	83	.	Missing	Missing	Missing	Missing	Missing	missing	Missing	NON PARTICIPANT
MVIE08127586	FEMININ	3	0	0	0	74	2	No	No	No	Good	Better	Higher education (short)	Couple	FULL PARTICIPANT
MVIE08127687	FEMININ	.	.	0	0	77	.	Missing	Missing	Missing	Missing	Missing	missing	Missing	NON PARTICIPANT
MVIE08127788	FEMININ	.	.	0	0	77	.	Missing	Missing	Missing	Missing	Missing	missing	Missing	NON PARTICIPANT
MVIE08127889	FEMININ	.	.	0	0	67	.	Missing	Missing	Missing	Missing	Missing	missing	Missing	NON PARTICIPANT
MVIE08127990	FEMININ	.	.	0	0	66	.	Missing	Missing	Missing	Missing	Missing	missing	Missing	NON PARTICIPANT
MVIE08128091	FEMININ	.	.	0	0	72	.	Missing	Missing	Missing	Missing	Missing	missing	Missing	NON PARTICIPANT
MVIE08128192	FEMININ	.	.	0	0	70	.	Missing	Missing	Missing	Missing	Missing	missing	Missing	NON PARTICIPANT
MVIE08128293	FEMININ	1	1	0	0	69	1	No	No	No	Good	As good as	Primary school	Single	FULL PARTICIPANT
MVIE08128394	FEMININ	.	.	0	0	75	.	Missing	Missing	Missing	Missing	Missing	missing	Missing	NON PARTICIPANT
MVIE08128495	FEMININ	.	.	0	0	72	.	Missing	Missing	Missing	Missing	Missing	missing	Missing	NON PARTICIPANT
MVIE08128596	FEMININ	.	.	0	0	83	.	Missing	Missing	Missing	Missing	Missing	missing	Missing	NON PARTICIPANT
MVIE08128600	FEMININ	4	2	0	0	69	0	No	No	No	Good	Do not know	Secondary 1st cycle	Single	FULL PARTICIPANT
MVIE08128701	FEMININ	.	.	0	0	72	.	Missing	Missing	Missing	Missing	Missing	missing	Missing	NON PARTICIPANT
MVIE08128802	FEMININ	.	.	0	0	79	.	Missing	Missing	Missing	Missing	Missing	missing	Missing	NON PARTICIPANT
MVIE08128903	FEMININ	.	.	0	0	75	1	No	No	No	Good	As good as	Primary school	Single	PARTIAL PARTICIPANT
MVIE08129004	FEMININ	.	.	0	0	68	0	No	No	No	Good	Better	Secondary 1st cycle	Couple	PARTIAL PARTICIPANT
MVIE08129105	FEMININ	3	2	0	0	66	2	No	Yes	No	Intermediate	As good as	Secondary 2nd cycle	Couple	FULL PARTICIPANT
MVIE08129206	FEMININ	4	5	0	0	71	1	No	No	No	Intermediate	As good as	Secondary 1st cycle	Single	FULL PARTICIPANT
MVIE08129307	FEMININ	.	.	0	0	70	.	Missing	Missing	Missing	Missing	Missing	missing	Missing	NON PARTICIPANT
MVIE08129408	FEMININ	.	.	0	1	84	.	Missing	Missing	Missing	Missing	Missing	missing	Missing	NON PARTICIPANT
MVIE08129509	FEMININ	.	.	0	1	73	.	Missing	Missing	Missing	Missing	Missing	missing	Missing	NON PARTICIPANT
MVIE08129610	FEMININ	.	.	0	0	87	.	Missing	Missing	Missing	Missing	Missing	missing	Missing	NON PARTICIPANT
MVIE08129711	FEMININ	.	.	0	0	73	4	No	No	No	Bad	Do not know	Secondary 1st cycle	Single	PARTIAL PARTICIPANT
MVIE08129812	FEMININ	5	9	0	0	74	1	No	No	No	Intermediate	Do not know	Primary school	Single	FULL PARTICIPANT
MVIE08129913	FEMININ	.	.	0	0	80	3	No	No	Do not know	Intermediate	As good as	Secondary 1st cycle	Couple	PARTIAL PARTICIPANT
MVIE08130014	FEMININ	.	.	0	0	78	.	Missing	Missing	Missing	Missing	Missing	missing	Missing	NON PARTICIPANT
MVIE08130115	FEMININ	.	.	0	0	77	.	Missing	Missing	Missing	Missing	Missing	missing	Missing	NON PARTICIPANT
MVIE08130216	FEMININ	.	.	0	0	96	.	Missing	Missing	Missing	Missing	Missing	missing	Missing	NON PARTICIPANT
MVIE08130317	FEMININ	.	.	0	0	85	.	Missing	Missing	Missing	Missing	Missing	missing	Missing	NON PARTICIPANT
MVIE08130418	FEMININ	.	.	0	0	71	.	Missing	Missing	Missing	Missing	Missing	missing	Missing	NON PARTICIPANT
MVIE08130519	MASCULIN	.	.	0	0	66	.	Missing	Missing	Missing	Missing	Missing	missing	Missing	NON PARTICIPANT
MVIE08130620	MASCULIN	.	.	0	0	76	.	Missing	Missing	Missing	Missing	Missing	missing	Missing	NON PARTICIPANT
MVIE08130721	MASCULIN	.	2	0	0	76	1	Do not know	No	No	Missing	Missing	Primary school	Couple	FULL PARTICIPANT
MVIE08130822	MASCULIN	.	.	0	0	75	.	Missing	Missing	Missing	Missing	Missing	missing	Missing	NON PARTICIPANT
MVIE08130923	MASCULIN	.	.	0	0	69	0	No	No	No	Intermediate	As good as	Secondary 1st cycle	Couple	PARTIAL PARTICIPANT
MVIE08131024	MASCULIN	.	.	0	0	85	.	Missing	Missing	Missing	Missing	Missing	missing	Missing	NON PARTICIPANT
MVIE08131125	MASCULIN	7	10	0	0	68	1	No	Yes	No	Good	Better	Higher education (short)	Couple	FULL PARTICIPANT
MVIE08131226	MASCULIN	.	.	1	0	77	.	Missing	Missing	Missing	Missing	Missing	missing	Missing	NON PARTICIPANT
MVIE08131327	MASCULIN	15	5	0	0	79	6	Yes	No	No	Intermediate	As good as	Secondary 1st cycle	Couple	FULL PARTICIPANT
MVIE08131428	MASCULIN	3	0	0	0	73	0	No	No	No	Intermediate	Do not know	Secondary 1st cycle	Couple	FULL PARTICIPANT
MVIE08131529	MASCULIN	.	.	0	0	82	.	Missing	Missing	Missing	Missing	Missing	missing	Missing	NON PARTICIPANT
MVIE08131630	MASCULIN	0	1	0	0	68	0	No	No	No	Good	As good as	Secondary 1st cycle	Couple	FULL PARTICIPANT
MVIE08131731	MASCULIN	.	.	0	0	71	.	Missing	Missing	Missing	Missing	Missing	missing	Missing	NON PARTICIPANT
MVIE08131832	MASCULIN	0	1	0	0	68	0	No	No	No	Good	As good as	Secondary 1st cycle	Family cohabitation	FULL PARTICIPANT
MVIE08131933	MASCULIN	.	.	0	0	74	.	Missing	Missing	Missing	Missing	Missing	missing	Missing	NON PARTICIPANT
MVIE08132034	MASCULIN	.	.	0	0	69	.	Missing	Missing	Missing	Missing	Missing	missing	Missing	NON PARTICIPANT
MVIE08132135	MASCULIN	.	.	0	0	77	.	Missing	Missing	Missing	Missing	Missing	missing	Missing	NON PARTICIPANT
MVIE08132236	MASCULIN	3	2	0	0	67	1	No	Yes	No	Bad	Better	Primary school	Couple	FULL PARTICIPANT
MVIE08132337	MASCULIN	3	0	0	0	66	1	No	No	No	Intermediate	Better	Secondary 1st cycle	Couple	FULL PARTICIPANT
MVIE08132438	MASCULIN	.	.	0	0	72	.	Missing	Missing	Missing	Missing	Missing	missing	Missing	NON PARTICIPANT
MVIE08132539	MASCULIN	.	.	1	0	68	.	Missing	Missing	Missing	Missing	Missing	missing	Missing	NON PARTICIPANT
MVIE08132640	MASCULIN	.	.	0	0	79	.	Missing	Missing	Missing	Missing	Missing	missing	Missing	NON PARTICIPANT
MVIE08132741	MASCULIN	.	.	0	0	67	.	Missing	Missing	Missing	Missing	Missing	missing	Missing	NON PARTICIPANT
MVIE08132842	MASCULIN	.	.	0	0	71	.	Missing	Missing	Missing	Missing	Missing	missing	Missing	NON PARTICIPANT
MVIE08132943	MASCULIN	.	.	0	0	67	.	Missing	Missing	Missing	Missing	Missing	missing	Missing	NON PARTICIPANT
MVIE08133044	MASCULIN	.	.	0	0	78	.	Missing	Missing	Missing	Missing	Missing	missing	Missing	NON PARTICIPANT
MVIE08133145	MASCULIN	.	.	0	0	90	0	No	No	No	Good	As good as	Secondary 2nd cycle	Couple	PARTIAL PARTICIPANT
MVIE08133246	MASCULIN	.	.	0	0	71	0	No	No	No	Very good	Better	Primary school	Single	PARTIAL PARTICIPANT
MVIE08133347	MASCULIN	.	.	0	0	77	.	Missing	Missing	Missing	Missing	Missing	missing	Missing	NON PARTICIPANT
MVIE08133448	MASCULIN	5	1	0	0	75	.	No	No	No	Very good	Better	Secondary 1st cycle	Couple	FULL PARTICIPANT
MVIE08133549	MASCULIN	.	.	0	0	80	.	Yes	No	No	Missing	Missing	Primary school	Couple	FULL PARTICIPANT
MVIE08133650	MASCULIN	.	.	0	0	72	.	Missing	Missing	Missing	Missing	Missing	missing	Missing	NON PARTICIPANT
MVIE08133751	MASCULIN	.	.	1	0	76	.	Missing	Missing	Missing	Missing	Missing	missing	Missing	NON PARTICIPANT
MVIE08133852	MASCULIN	4	3	0	0	79	1	No	No	No	Good	Better	Secondary 1st cycle	Couple	FULL PARTICIPANT
MVIE08133953	MASCULIN	2	7	0	0	68	1	Yes	No	No	Intermediate	Worse	Secondary 2nd cycle	Couple	FULL PARTICIPANT
MVIE08134054	MASCULIN	1	0	0	0	69	3	No	No	No	Good	Better	Secondary 1st cycle	Single	FULL PARTICIPANT
MVIE08134155	MASCULIN	.	.	0	0	69	.	Missing	Missing	Missing	Missing	Missing	missing	Missing	NON PARTICIPANT
MVIE08134256	MASCULIN	18	2	0	0	68	0	Yes	No	No	Intermediate	As good as	Primary school	Couple	FULL PARTICIPANT
MVIE08134357	MASCULIN	.	.	0	0	79	.	Missing	Missing	Missing	Missing	Missing	missing	Missing	NON PARTICIPANT
MVIE08134458	MASCULIN	0	1	0	0	71	0	No	No	No	Good	Better	Secondary 1st cycle	Single	FULL PARTICIPANT
MVIE08134559	MASCULIN	.	.	0	0	81	.	Missing	Missing	Missing	Missing	Missing	missing	Missing	NON PARTICIPANT
MVIE08134660	MASCULIN	.	.	0	0	67	.	Missing	Missing	Missing	Missing	Missing	missing	Missing	NON PARTICIPANT
MVIE08134761	MASCULIN	.	.	0	0	82	.	Missing	Missing	Missing	Missing	Missing	missing	Missing	NON PARTICIPANT
MVIE08134862	MASCULIN	.	.	0	0	68	.	Missing	Missing	Missing	Missing	Missing	missing	Missing	NON PARTICIPANT
MVIE08134963	MASCULIN	.	.	0	0	66	.	Missing	Missing	Missing	Missing	Missing	missing	Missing	NON PARTICIPANT
MVIE08135064	MASCULIN	.	.	0	0	70	1	No	No	No	Good	As good as	Higher education - University	Couple	PARTIAL PARTICIPANT
MVIE08135165	MASCULIN	.	.	0	0	75	.	Missing	Missing	Missing	Missing	Missing	missing	Missing	NON PARTICIPANT
MVIE08135266	MASCULIN	0	0	0	0	74	0	No	No	No	Good	Do not know	Secondary 1st cycle	Couple	FULL PARTICIPANT
MVIE08135367	MASCULIN	4	2	0	1	91	2	Yes	No	No	Good	As good as	Secondary 2nd cycle	Single	FULL PARTICIPANT
MVIE08135468	MASCULIN	.	.	0	0	81	.	Missing	Missing	Missing	Missing	Missing	missing	Missing	NON PARTICIPANT
MVIE08135569	MASCULIN	.	.	0	0	79	.	Missing	Missing	Missing	Missing	Missing	missing	Missing	NON PARTICIPANT
MVIE08135670	MASCULIN	8	5	0	1	79	1	Yes	No	No	Good	Better	Primary school	Non-family cohabitation	FULL PARTICIPANT
MVIE08135771	MASCULIN	.	.	0	0	75	1	No	Yes	No	Intermediate	Do not know	Secondary 1st cycle	Single	PARTIAL PARTICIPANT
MVIE08135872	MASCULIN	.	.	0	0	72	.	Missing	Missing	Missing	Missing	Missing	missing	Missing	NON PARTICIPANT
MVIE08135973	MASCULIN	.	.	0	0	69	.	Missing	Missing	Missing	Missing	Missing	missing	Missing	NON PARTICIPANT
MVIE08136074	MASCULIN	2	0	0	0	72	0	No	No	No	Good	Better	Higher education (short)	Couple	FULL PARTICIPANT
MVIE08136175	MASCULIN	.	.	0	0	77	.	Missing	Missing	Missing	Missing	Missing	missing	Missing	NON PARTICIPANT
MVIE08136276	MASCULIN	.	.	1	0	88	.	Missing	Missing	Missing	Missing	Missing	missing	Missing	NON PARTICIPANT
MVIE08136377	MASCULIN	.	.	0	0	72	.	Missing	Missing	Missing	Missing	Missing	missing	Missing	NON PARTICIPANT
MVIE08136478	MASCULIN	.	.	0	0	70	.	Missing	Missing	Missing	Missing	Missing	missing	Missing	NON PARTICIPANT
MVIE08136579	MASCULIN	.	.	0	0	83	.	Missing	Missing	Missing	Missing	Missing	missing	Missing	NON PARTICIPANT
MVIE08136680	MASCULIN	.	.	0	0	85	.	Missing	Missing	Missing	Missing	Missing	missing	Missing	NON PARTICIPANT
MVIE08136781	MASCULIN	.	.	0	0	74	.	Missing	Missing	Missing	Missing	Missing	missing	Missing	NON PARTICIPANT
MVIE08136882	MASCULIN	.	.	0	0	77	.	Missing	Missing	Missing	Missing	Missing	missing	Missing	NON PARTICIPANT
MVIE08136983	MASCULIN	.	.	0	0	67	.	Missing	Missing	Missing	Missing	Missing	missing	Missing	NON PARTICIPANT
MVIE08137084	MASCULIN	.	.	0	0	75	.	Missing	Missing	Missing	Missing	Missing	missing	Missing	NON PARTICIPANT
MVIE08137185	MASCULIN	.	.	0	0	81	.	Missing	Missing	Missing	Missing	Missing	missing	Missing	NON PARTICIPANT
MVIE08137286	MASCULIN	.	.	0	0	70	.	Missing	Missing	Missing	Missing	Missing	missing	Missing	NON PARTICIPANT
MVIE08137387	MASCULIN	.	.	0	0	73	.	Missing	Missing	Missing	Missing	Missing	missing	Missing	NON PARTICIPANT
MVIE08137488	MASCULIN	.	.	0	0	68	.	Missing	Missing	Missing	Missing	Missing	missing	Missing	NON PARTICIPANT
MVIE08137589	MASCULIN	.	.	0	0	79	.	Missing	Missing	Missing	Missing	Missing	missing	Missing	NON PARTICIPANT
MVIE08137690	MASCULIN	.	.	0	0	77	.	Missing	Missing	Missing	Missing	Missing	missing	Missing	NON PARTICIPANT
MVIE08137791	MASCULIN	0	5	0	0	68	1	No	Yes	No	Good	As good as	Secondary 1st cycle	Couple	FULL PARTICIPANT
